# Supplementary material for: Functionalised dihydroazo pyrimidine derivatives from Morita–Baylis–Hillman acetates: synthesis and studies against acetylcholinesterase as its inhibitors
Source: Royal Society of Chemistry journal article supplement (doi:10.1039/c6ra12507g), 2016-01-01
Supplement: c6ra12507g1.pdf [file c6ra12507g1.pdf]

## Supporting information

### Functionalised dihydroazo pyrimidine derivatives from Morita-Baylis-Hillman Acetates: Synthesis and studies against Acetylcholinesterase inhibitors.

Koti Reddy Eeda <sup>a</sup>, Remya Chandran <sup>b</sup>, Ayyiliah M Sajith <sup>c</sup>, Dileep KV <sup>d</sup>, C Sadasivan <sup>b</sup>,  
Shaik Anwar <sup>a,\*</sup>

<sup>a</sup> Division of Chemistry, Department of Science and Humanities, Vignan's Foundation for Science, Technology and Research University-VFSTRU (Vignan University), Vaddamudi, Guntur, 522 213, Andrapradesh, India.  
[shaikanwarcu@gmail.com](mailto:shaikanwarcu@gmail.com)

<sup>b</sup> Department of Biotechnology and Microbiology and inter-university centre for Bioscience, Kannur University, Thalassery, Kerala, India.

<sup>c</sup> Post Graduate and Research Department of Chemistry, Kasargod Govt. College, Kannur university, Kasaragod, India.

<sup>d</sup> School of Chemistry, Indian Institute of Science Education and Research, Thiruvananthapuram, Computer Science Building, College of Engineering, Trivandrum Campus, Trivandrum-695016, Kerala, India.

#### Table of contents

|                                                                                                    |         |
|----------------------------------------------------------------------------------------------------|---------|
| 1. X-ray crystal structure for compound 3e and 4b                                                  | 2       |
| 2. General information and general procedure                                                       | 3       |
| 3. Data for all newly synthesised compounds                                                        | 4 – 17  |
| 4. Figure 1 & 2                                                                                    | 18      |
| 5. Figure 3                                                                                        | 19      |
| 6. Biology data                                                                                    | 20- 27  |
| 7. Spectral data ( <sup>1</sup> H NMR and <sup>13</sup> C NMR) for all newly synthesised compounds | 28 - 54 |

## X-ray Crystallographic data

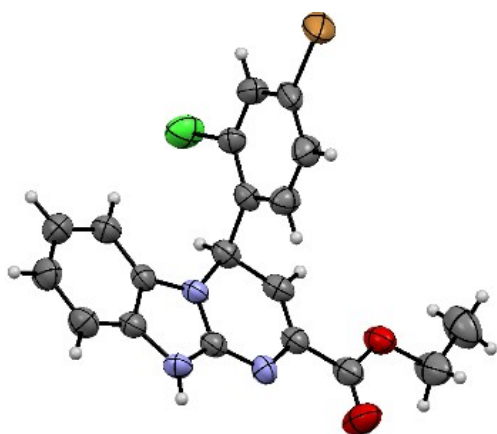

Compound 3e

CCDC Number: 1446736

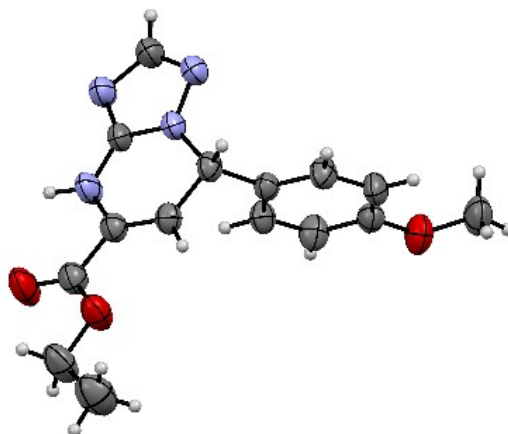

Compound 4b

CCDC Number: 1456725

## **General information**

Morita-Baylis-Hillman Acetates of nitroalkenes **1** were synthesized according to literature.<sup>11</sup> All experiments were performed under nitrogen atmosphere. All solvents and reagents are procured from commercially available sources like Aldrich, Alfa-aser, spectrochem. Commercially available pre packed silica gel (230-400 mesh) plugs, hexane and ethyl acetate solvents were used for column chromatographic purification. Isolated yields correspond to products of greater > 90% purity as determined by LC-MS and NMR. All NMR (<sup>1</sup>H, <sup>13</sup>C) chemical shifts are reported in parts per million (ppm), all coupling constants are reported in Hertz (Hz) and tetramethylsilane used as internal standard for <sup>1</sup>H NMR. Liquid chromatography- mass spectrometry (LC-MS) was used for reaction monitoring and identification for product mass.

## **Experimental procedure for synthesis of compound (3a-3l):**

To a solution of 2-aminobenzimidazole (0.15 mmol) in acetonitrile (1.0 mL) was mixed with MBH Acetate of nitro alkene (0.18 mmol) followed by the addition of cesium carbonate (0.3 mmol) and the reaction mixture was stirred for 12h at RT. After completion of reaction (monitored by LCMS), the reaction mixture was quenched with water (5 mL). The reaction mixture was extracted with ethyl acetate (3x 10 mL). The combined organic layers were dried over anhydrous sodium sulphate, filtered and concentrated. To this crude product was added methanol (4 mL) and stirred for 30 min at RT. A white precipitate was obtained which was filtered gave the product (60% - 82%). The mother liquid contains a small amount of product by LCMS.

**Ethyl 4-phenyl-4,10-dihydrobenzo[4,5]imidazo[1,2-a]pyrimidine-2-carboxylate (3a):**

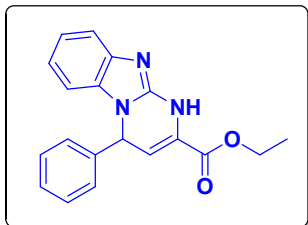

White solid; yield 46 mg, 82%; MP: 145-147 °C; **<sup>1</sup>H NMR** (400 MHz, Chloroform-*d*): δ 7.55 (dd, *J* = 7.9, 3.0 Hz, 1H), 7.39 - 7.28 (m, 5H), 7.17-7.13(m, 1H), 6.97-6.93(m, 1H), 6.79-6.77 (m, 1H), 6.19 (d, *J* = 4.0 Hz, 1H), 5.99 (d, *J* = 4.0 Hz, 1H), 4.38-4.30 (dq, *J* = 7.2 Hz, 4.8Hz, 2.0Hz, 2H), 1.35 (t, *J* = 7.4 Hz, 3H). **<sup>13</sup>C NMR** (75 MHz, Chloroform-*d*) δ 162.39, 144.42, 143.65, 137.79, 133.55, 129.53, 129.07, 128.19, 126.39, 122.96, 122.39, 122.19, 118.64, 109.97, 62.75, 59.28, 14.10. **LCMS:** *m/z* calculated for C<sub>19</sub>H<sub>17</sub>N<sub>3</sub>O<sub>2</sub>: 319.13; Observed mass: 320.2 (M+1); Anal. Calculated for C<sub>19</sub>H<sub>17</sub>N<sub>3</sub>O<sub>2</sub>: C, 71.46; H, 5.37; N, 13.16. Found: C, 71.44; H, 5.35; N, 13.18.

**Ethyl-4-(4-bromophenyl)-4,10-dihydrobenzo[4,5]imidazo[1,2-a]pyrimidine-2-carboxylate (3b):**

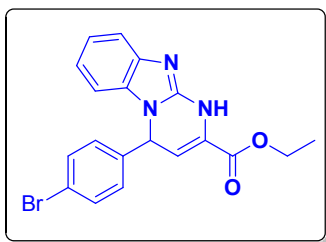

Pale brown solid; yield 57 mg, 80%; MP: 151-153 °C; **<sup>1</sup>H NMR** (400 MHz, Chloroform-*d*): δ 7.57 (d, *J* = 8.0 Hz, 1H), 7.51 (d, *J* = 1.8 Hz, 1H), 7.50 (d, *J* = 1.9 Hz, 1H), 7.21 – 7.14 (m, 3H), 6.99-6.95 (m, 1H), 6.75 (d, *J* = 8.0 Hz, 1H), 6.17 (d, *J* = 4.0 Hz, 1H). 5.92 (d, *J* = 4.0 Hz, 1H), 4.35 (qq, *J* = 7.3, 3.7 Hz, 2H), 1.34 (t, *J* = 7.1 Hz, 3H). **<sup>13</sup>C NMR** (75 MHz, Chloroform-*d*) δ 161.71, 146.59, 142.04, 138.62, 132.44, 132.04, 131.51, 128.11, 126.17, 122.70, 122.52, 120.67, 117.21, 109.41, 105.84, 62.36, 57.40, 14.07. **LCMS:** *m/z* calculated for C<sub>19</sub>H<sub>16</sub>BrN<sub>3</sub>O<sub>2</sub>: 397.04; Observed mass: 398.2, 400.2 (M+1, M+3); Anal. Calculated for C<sub>19</sub>H<sub>16</sub>BrN<sub>3</sub>O<sub>2</sub>: C, 57.30; H, 4.05; N, 10.55;. Found: C, 57.31; H, 4.07; N, 10.54.

**Ethyl-4-(p-tolyl)-4,10-dihydrobenzo[4,5]imidazo[1,2-a]pyrimidine-2-carboxylate (3c):**

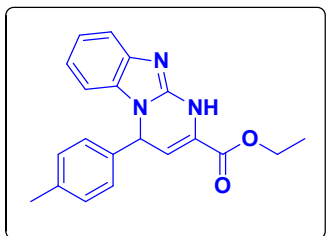

White solid; yield 46 mg, 77%; MP: 143-145 °C; <sup>1</sup>H NMR (400 MHz, DMSO-*d*<sub>6</sub>) δ (ppm) 7.93 (d, *J* = 6.56 Hz, 2H), 7.84–7.81 (m, 2H), 7.61-7.56 (m, 2H), 7.34-7.29 (m, 2H), 6.57 (d, *J* = 4.0 Hz, 1H), 6.16 (d, *J* = 4.0 Hz, 1H), 4.17 (q, *J* = 6.8 Hz, 2H), 2.11 (s, 3H), 1.23 (t, *J* = 6.8 Hz, 3H). <sup>13</sup>C NMR δ (ppm) 161.94, 148.24, 144.41, 143.67, 133.13, 127.23, 126.11, 124.90, 123.99, 123.49, 122.88, 119.06, 63.05, 58.43, 23.08, 14.08. **LCMS:** *m/z* calculated for C<sub>20</sub>H<sub>19</sub>N<sub>3</sub>O<sub>2</sub>: 333.15; Observed mass: 334.2 (M+1). Anal. Calculated for C<sub>20</sub>H<sub>19</sub>N<sub>3</sub>O<sub>2</sub>: C, 72.05; H, 5.74; N, 12.60; Found: C, 72.07; H, 5.75; N, 12.64

**Ethyl-4-(5-bromo-2-fluorophenyl)-4,10-dihydrobenzo[4,5]imidazo[1,2-a]pyrimidine-2-carboxylate (3d):**

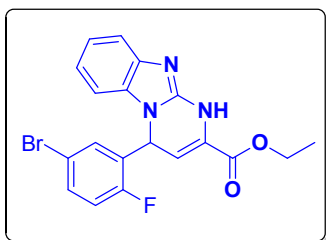

Yellow solid; yield 46 mg, 68%; MP: 150-152 °C; <sup>1</sup>H NMR (300 MHz, DMSO-*d*<sub>6</sub>): δ 10.15 (bs, 1H), 7.79 (s, 1H), 7.54 (dd, *J* = 8.2, 2.2 Hz, 1H), 7.37 (d, *J* = 7.7 Hz, 1H), 7.08-7.03 (m, 2H), 6.90 (t, *J* = 7.6 Hz, 1H), 6.73-6.70 (m, 2H), 5.83 (d, *J* = 3.9 Hz, 1H), 4.25 (q, *J* = 7.0 Hz, 2H), 1.28 (t, *J* = 7.0 Hz, 3H). <sup>13</sup>C NMR (101 MHz, DMSO) δ 166.89, 161.63, 153.30, 150.78, 142.39, 131.47, 131.41, 130.59, 127.97, 125.85, 125.56, 123.80, 123.76, 121.28, 121.24, 118.20, 106.17, 62.18, 59.24, 14.31. **LCMS:** *m/z* calculated for C<sub>19</sub>H<sub>15</sub>BrFN<sub>3</sub>O<sub>2</sub>: 415.03; Observed mass: 416.2, 418.2 (M+1, M+3); Anal. Calculated for C<sub>19</sub>H<sub>15</sub>BrFN<sub>3</sub>O<sub>2</sub>: C, 54.82; H, 3.63; N, 10.10; Found: C, 54.83; H, 3.65; N, 10.12.

**Ethyl-4-(4-bromo-2-chlorophenyl)-4,10-dihydrobenzo[4,5]imidazo[1,2-a]pyrimidine-2-carboxylate (3e):**

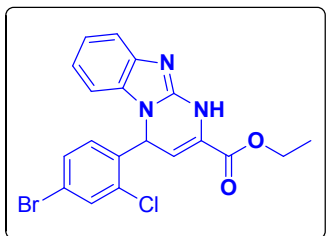

White solid; yield 54 mg, 70%; MP: 153-155 °C; **<sup>1</sup>H NMR** (400 MHz, Chloroform-*d*): δ 7.65 (d, *J* = 1.6 Hz, 1H), 7.55 (d, *J* = 8.0 Hz, 1H), 7.31 (dd, *J* = 8.4, 1.6 Hz, 1H), 7.20 (t, 7.2 Hz, 1H), 7.02 (t, *J* = 8.0 Hz, 1H), 6.85 (d, *J* = 8.0 Hz, 1H), 6.77 (d, *J* = 8.0 Hz, 1H), 6.67 (d, *J* = 4.0 Hz, 1H), 6.01 (d, *J* = 4.0 Hz, 1H), 4.36 (qq, *J* = 7.2 Hz, 2H), 1.37 (t, *J* = 7.2 Hz, 3H). **<sup>13</sup>C NMR** (75 MHz, Chloroform-*d*) δ 161.47, 135.37, 132.69, 131.32, 129.56, 126.72, 122.93, 122.81, 121.13, 117.19, 109.15, 103.84, 62.52, 50.80, 14.07. **LCMS:** *m/z* calculated for C<sub>19</sub>H<sub>15</sub>BrClN<sub>3</sub>O<sub>2</sub>: 431.00; Observed mass: 431.2, 433.2 (M+1, M+3); Anal. Calculated for C<sub>19</sub>H<sub>15</sub>BrClN<sub>3</sub>O<sub>2</sub>: C, 52.74; H, 3.49; N, 9.71; Found: C, 52.76; H, 3.50; N, 9.73.

**Ethyl-4-(pyridin-2-yl)-4,10-dihydrobenzo[4,5]imidazo[1,2-a]pyrimidine-2-carboxylate (3f):**

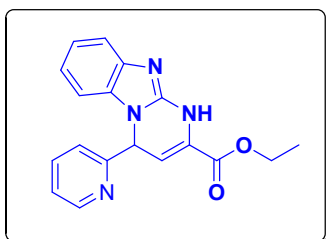

White solid; yield 40 mg, 70%; MP: 155-156 °C; **<sup>1</sup>H NMR** (300 MHz, DMSO-*d*6): δ 7.73-7.61 (m, 4H), 7.48 (d, *J* = 7.8 Hz, 1H), 7.10-7.06 (m, 2H), 6.85-6.81 (m, 1H), 6.46 (d, *J* = 3.9 Hz, 1H), 5.86 (d, *J* = 3.9 Hz, 1H), 4.25 (qq, *J* = 7.2, 3.6 Hz, 2H), 1.25 (t, *J* = 7.1 Hz, 3H). **<sup>13</sup>C NMR** (101 MHz, DMSO) δ 166.88, 161.51, 153.29, 150.95, 150.65, 140.81, 139.03, 136.16, 131.40, 128.88, 125.86, 124.63, 121.25, 121.30, 118.20, 103.72, 62.26, 59.34, 14.33. **LCMS:** *m/z* calculated for C<sub>18</sub>H<sub>16</sub>N<sub>4</sub>O<sub>2</sub>: 320.13; Observed mass:

321.2 (M+1). Anal. Calculated for C<sub>18</sub>H<sub>16</sub>N<sub>4</sub>O<sub>2</sub>: C, 67.49; H, 5.03; N, 17.49; Found: C, 67.51; H, 5.03; N, 17.48.

**Ethyl-4-(5-bromo-2-fluoropyridin-3-yl)-4,10-dihydrobenzo[4,5]imidazo[1,2-a]pyrimidine-2-carboxylate (3g):**

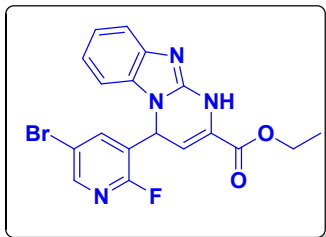

Brown solid; yield 50 mg, 67%; MP: 162-164 °C; **<sup>1</sup>H NMR** (300 MHz, Chloroform-*d*): 8.35 (s, 1H), 7.81 (s, 1H), 7.62-7.55 (m, 2H), 7.35-7.25 (m, 2H), 6.67 (d, J= 3.9 Hz, 1H), 6.02 (d, J= 3.9 Hz, 1H), 4.36 (q, J= 7.2 Hz, 2H), 1.36 (t, J= 7.2 Hz, 3H). **<sup>13</sup>C NMR** (75 MHz, Chloroform-*d*) δ 162.32, 143.99, 143.68, 140.10, 133.40, 127.46, 127.22, 126.80, 126.16, 123.40, 123.10, 122.48, 118.79, 109.70, 62.82, 53.92, 14.11. **LCMS**: *m/z* calculated for C<sub>18</sub>H<sub>14</sub>BrFN<sub>4</sub>O<sub>2</sub>: 416.03; Observed mass: 417.2, 419.2 (M+1, M+3); Anal. Calculated for C<sub>18</sub>H<sub>14</sub>BrFN<sub>4</sub>O<sub>2</sub>: C, 51.82; H, 3.38; N, 13.43; Found: C, 51.83; H, 3.40; N, 13.46.

**Ethyl-4-(3-hydroxyphenyl)-4,10-dihydrobenzo[4,5]imidazo[1,2-a]pyrimidine-2-carboxylate (3h):**

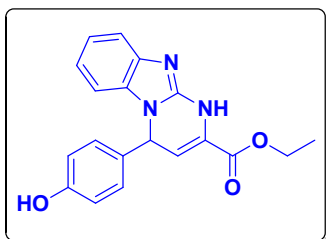

Colour less gummy nature; yield 44 mg, 73%; MP: 134-137 °C; **<sup>1</sup>H NMR** (400 MHz, Chloroform-*d*): δ 7.88 – 7.86 (m, 1H), 7.78 (dd, J = 8.8, 2.4 Hz, 2H), 7.69-7.66 (m, 2H), 7.18 (dd, J = 8.8, 2.4 Hz, 1H), 7.15 (d, J = 2.4 Hz, 1H), 6.73 (d, J = 4.0 Hz, 1H), 6.39 (d, J = 4.0 Hz, 1H), 5.88 (bs, 1H), 4.18 (q, J = 7.2 Hz, 2H), 1.31 (t, J = 7.2 Hz, 3H). **<sup>13</sup>C NMR** (101 MHz, CDCl<sub>3</sub>) δ 161.48, 151.75, 150.36, 139.70, 133.37, 131.35, 131.05, 129.22, 127.78, 126.54, 126.03, 122.34, 120.94, 119.11, 104.86, 62.52, 59.58, 14.12. **LCMS**:

$m/z$  calculated for  $C_{19}H_{17}N_3O_3$ : 335.13; Observed mass: 336.2 (M+1); Anal. Calculated for  $C_{19}H_{17}N_3O_3$ : C, 68.05; H, 5.11; N, 12.53; Found: C, 68.07; H, 5.13; N, 12.55.

**Ethyl-4-(2-fluorophenyl)-4,10-dihydrobenzo[4,5]imidazo[1,2-a]pyrimidine-2-carboxylate (3i):**

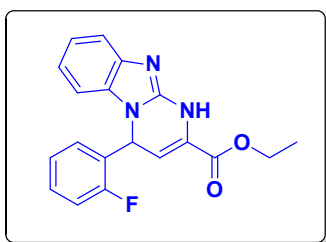

Pale yellow solid; yield 36 mg, 60%; MP: 141-143 °C;  $^1\text{H NMR}$  (400 MHz, Chloroform- $d$ ):  $\delta$  8.74 (dd,  $J = 7.2, 2.4$  Hz, 1H), 8.27 (s, 1H), 7.90 (m, 1H), 7.82 - 7.79 (m, 2H), 7.56 - 7.49 (m, 1H), 7.48 - 7.43 (m, 2H), 7.38 (d,  $J = 4.0$  Hz, 1H), 6.55 (d,  $J = 4.0$  Hz, 1H), 4.54 (q,  $J = 7.2$  Hz, 2H), 1.48 (t,  $J = 7.2$  Hz, 3H).  $^{13}\text{C NMR}$  (75 MHz,  $\text{CDCl}_3$ )  $\delta$  162.47, 160.06, 144.40, 143.60, 133.54, 129.81, 128.50, 127.76, 122.92, 122.33, 121.74, 118.58, 114.83, 110.04, 62.72, 58.73, 14.11. **LCMS:**  $m/z$  calculated for  $C_{19}H_{16}FN_3O_2$ : 337.12; Observed mass: 338.2 (M+1); Anal. Calculated for  $C_{19}H_{16}FN_3O_2$ : C, 67.65; H, 4.78; N, 12.46; Found: C, 67.65; H, 4.76; N, 12.45.

**Ethyl-4-(2-nitrophenyl)-1,4-dihydrobenzo[4,5]imidazo[1,2-a]pyrimidine-2-carboxylate (3j):**

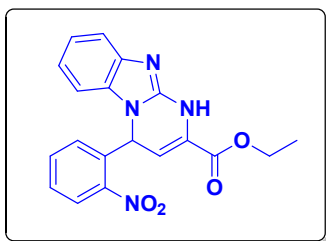

white solid; yield 33 mg, 51%; MP: 150-153 °C;  $^1\text{H NMR}$  (400 MHz, Chloroform- $d$ ):  $\delta$  8.13 (dd,  $J = 7.2$  Hz, 2.0 Hz, 1H), 7.57-7.48 (m, 3H), 7.18 (dt,  $J = 7.2$  Hz, 1H), 7.03 (dd,  $J = 7.2$  Hz, 2.0 Hz, 1H), 6.99-6.97 (m, 1H), 6.95 (d,  $J = 4.0$  Hz, 1H), 6.64 (d,  $J = 8.0$  Hz, 1H), 6.27 (d,  $J = 4.0$  Hz, 1H), 4.38 (dq,  $J = 7.2$  Hz, 2H), 1.37 (t,  $J = 7.2$  Hz,

3H). **<sup>13</sup>C NMR** (75 MHz, CDCl<sub>3</sub>) δ 161.78, 156.28, 148.83, 140.06, 134.69, 129.78, 129.16, 127.69, 127.24, 124.47, 121.53, 119.41, 114.12, 111.95, 61.94, 58.09, 14.24. **LCMS:** *m/z* calculated for C<sub>19</sub>H<sub>16</sub>N<sub>4</sub>O<sub>4</sub>: 364.12; Observed mass: 365.2 (M+1); Anal. Calculated for C<sub>19</sub>H<sub>16</sub>N<sub>4</sub>O<sub>4</sub>: C, 62.63; H, 4.43; N, 15.38; Found: C, 62.65; H, 4.44; N, 15.40.

**Ethyl-4-(3-(trifluoromethyl)phenyl)-1,4-dihydrobenzo[4,5]imidazo[1,2-a]pyrimidine-2-carboxylate (3k):**

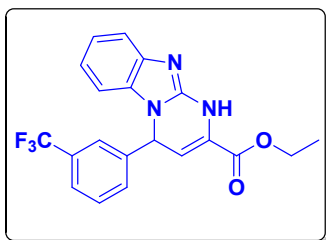

white powder; yield 50 mg, 72%; MP: 140-142 °C; **<sup>1</sup>H NMR** (300 MHz, Chloroform-*d*): δ 7.61-7.50 (m, 4H), 7.32 (m, 2H), 7.14 (m, 2H), 6.29 (d, *J* = 3.9 Hz, 1H), 5.90 (d, *J* = 3.9 Hz, 1H), 4.36 (q, *J* = 7.2 Hz, 2H), 1.34 (t, *J* = 7.2 Hz, 3H). **<sup>13</sup>C NMR** (101 MHz, CDCl<sub>3</sub>) δ 166.04, 161.61, 151.97, 150.24, 148.71, 138.70, 132.69, 132.22, 131.51, 128.85, 128.47, 127.53, 125.99, 123.03, 122.31, 120.90, 119.22, 105.49, 62.37, 60.03, 14.13. **LCMS:** *m/z* calculated for C<sub>20</sub>H<sub>16</sub>F<sub>3</sub>N<sub>3</sub>O<sub>2</sub>: 387.12; Observed mass: 388.2 (M+1); Anal. Calculated for C<sub>20</sub>H<sub>16</sub>F<sub>3</sub>N<sub>3</sub>O<sub>2</sub>: C, 62.01; H, 4.16; N, 10.85; Found: C, 62.03; H, 4.17; N, 10.87.

**Ethyl-4-(4-methoxyphenyl)-1,4-dihydrobenzo[4,5]imidazo[1,2-a]pyrimidine-2-carboxylate (3l):**

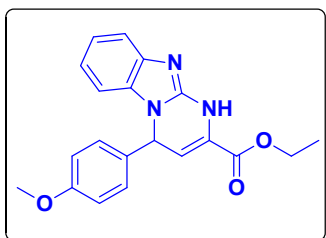

White solid; yield 47 mg, 75%; MP: 146-147 °C; **<sup>1</sup>H NMR** (400 MHz, Chloroform-*d*): δ 9.68 (bs, 1H), 7.61-7.56 (m, 2H), 7.35-7.31 (m, 1H), 7.26 (d, *J* = 8.4 Hz, 2H), 7.16-7.12 (m, 1H), 6.91 (d, *J* = 8.4 Hz, 2H), 6.17 (d, *J* = 4.0 Hz, 1H), 5.93 (d, *J* = 4.0 Hz, 1H), 4.41-4.29 (m, 2H), 3.80 (s, 3H), 1.35 (t, *J* = 7.2 Hz, 3H). **<sup>13</sup>C NMR** (101 MHz, CDCl<sub>3</sub>) δ 161.82, 160.01, 150.06, 148.62, 132.03, 131.57, 128.54, 127.18, 125.97, 122.29,

120.88, 119.27, 114.40, 106.45, 62.19, 60.05, 55.33, 14.14. **LCMS:**  $m/z$  calculated for  $C_{20}H_{19}N_3O_3$ : 349.14; Observed mass: 350.2 (M+1); Anal. Calculated for  $C_{20}H_{19}N_3O_3$ : C, 68.75; H, 5.48; N, 12.03; Found: C, 68.77; H, 5.49; N, 12.05.

**Ethyl-5-phenyl-5,8-dihydroimidazo[1,2-a]pyrimidine-7-carboxylate (3m):**

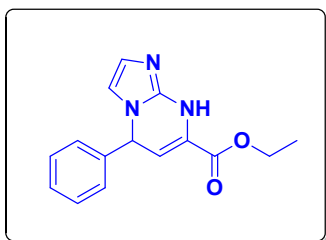

Colourless solid; yield 30 mg, 62%; MP: 162-164 °C;  **$^1H$  NMR** (400 MHz, Chloroform-*d*):  $\delta$  7.43-7.25 (m, 5H), 7.15 (dd,  $J$  = 3.9 Hz, 8.4 Hz, 1H), 6.53 (d,  $J$  = 3.6 Hz, 1H), 6.21 (dd,  $J$  = 3.9 Hz, 8.4 Hz, 1H), 5.92 (dd,  $J$  = 3.9 Hz, 8.4 Hz, 1H), 4.36 (dq,  $J$  = 7.2 Hz, 3.6 Hz, 2H), 1.35 (t,  $J$  = 7.2 Hz, 3H).  **$^{13}C$  NMR** (75 MHz,  $CDCl_3$ )  $\delta$  161.78, 148.83, 140.06, 134.69, 129.78, 129.16, 127.69, 127.24, 124.47, 121.53, 119.41, 111.95, 61.94, 58.09, 14.24. **LCMS:**  $m/z$  calculated for  $C_{15}H_{15}N_3O_2$ : 269.12; Observed mass: 270.2 (M+1); Anal. Calculated for  $C_{15}H_{15}N_3O_2$ : C, 66.90; H, 5.61; N, 15.60; Found: C, 66.92; H, 5.60; N, 15.62.

**Ethyl-5-(4-bromophenyl)-5,8-dihydroimidazo[1,2-a]pyrimidine-7-carboxylate (3n):**

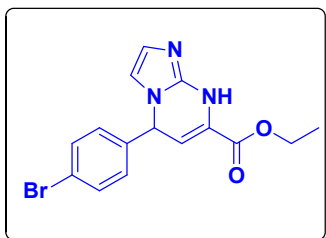

Pale brown solid; yield 41 mg, 66%; MP: 169-172 °C;  **$^1H$  NMR** (400 MHz, Chloroform-*d*):  $\delta$  10.25 (bs, 1H), 7.46 (d,  $J$  = 8.0 Hz, 2H), 7.38 (d,  $J$  = 1.6 Hz, 2H), 7.16-7.11 (m, 1H), 6.54 (d,  $J$  = 3.6 Hz, 1H), 6.16 (d,  $J$  = 4.0 Hz, 1H), 5.85 (d,  $J$  = 4.0 Hz, 1H), 4.36 (dq,  $J$  = 7.2 Hz, 3.6 Hz, 2H), 1.36 (t,  $J$  = 7.2 Hz, 3H).  **$^{13}C$  NMR** (101 MHz,

DMSO)  $\delta$  161.67, 150.63, 149.25, 140.47, 132.20, 129.49, 127.73, 121.94, 114.08, 106.46, 62.15, 59.11, 14.34. **LCMS**:  $m/z$  calculated for  $C_{15}H_{14}BrN_3O_2$ : 347.03; Observed mass: 348.2, 350.2 (M+1, M+3); Anal. Calculated for  $C_{15}H_{14}BrN_3O_2$ : C, 51.74; H, 4.05; N, 12.07; Found: C, 51.76; H, 4.07; N, 12.08.

**Ethyl-5-(4-methoxyphenyl)-5,8-dihydroimidazo[1,2-a]pyrimidine-7-carboxylate (3o):**

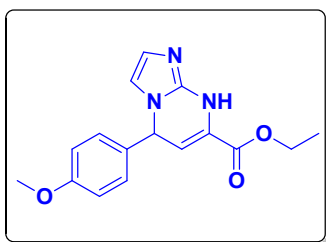

White solid; yield 31 mg, 59%; MP: 162-164 °C;  **$^1H$  NMR** (400 MHz, Chloroform- $d$ ):  $\delta$  9.59 (bs, 1H), 7.27-7.24 (m, 2H), 7.12 (d,  $J$  = 3.2 Hz, 2H), 6.90 (d,  $J$  = 8.4 Hz, 1H), 6.53 (d,  $J$  = 3.6 Hz, 1H), 6.15 (d,  $J$  = 3.6 Hz, 1H), 5.29 (d,  $J$  = 3.6 Hz, 1H), 4.33 (q,  $J$  = 7.2 Hz, 2H), 3.80 (s, 3H), 1.35 (t,  $J$  = 7.2 Hz, 3H).  **$^{13}C$  NMR**: (75 MHz, Chloroform- $d$ )  $\delta$  161.58, 150.20, 148.70, 138.71, 132.33, 128.84, 128.57, 127.57, 123.01, 105.39, 62.12, 61.58, 54.35, 14.16. **LCMS**:  $m/z$  calculated for  $C_{16}H_{17}N_3O_3$ : 299.13; Observed mass: 300.2 (M+1); Anal. Calculated for  $C_{16}H_{17}N_3O_3$ : C, 64.20; H, 5.72; N, 14.04; Found: C, 64.22; H, 5.74; N, 14.06.

**Ethyl-5-(3-(trifluoromethyl)-phenyl)-5,8-dihydroimidazo[1,2-a]pyrimidine-7-carboxylate (3p):**

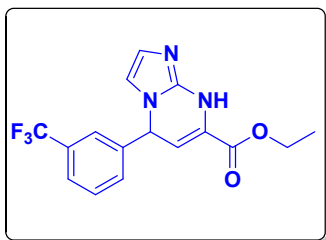

yield 40 mg, 66%; MP: 155-157 °C;  **$^1H$  NMR** (400 MHz, Chloroform- $d$ ):  $\delta$  7.72-7.61 (m, 2H), 7.57-7.46 (m, 2H), 7.04 (d,  $J$  = 4.0 Hz, 1H), 6.51 (d,  $J$  = 4.0 Hz, 1H), 6.27 (d,  $J$  = 3.8 Hz, 1H), 5.90 (d,  $J$  = 4.0 Hz, 1H), 4.38 (dq,  $J$  = 7.2 Hz, 3.6 Hz, 2H), 1.36 (t,  $J$  = 7.2 Hz, 3H).  **$^{13}C$  NMR** (126 MHz, DMSO)  $\delta$  161.62, 150.80, 149.35, 142.41,

131.49, 130.63, 129.69, 127.91, 125.62, 123.79, 113.91, 106.18, 62.19, 59.20, 14.33. **LCMS:**  $m/z$  calculated for  $C_{16}H_{14}F_3N_3O_2$ : 337.10; Observed mass: 338.2 (M+1); Anal. Calculated for  $C_{16}H_{14}F_3N_3O_2$ : C, 56.97; H, 4.18; N, 12.46; Found: C, 56.96; H, 4.19; N, 12.48.

**Ethyl-5-(5-bromo-2-fluorophenyl)-5,8-dihydroimidazo[1,2-a]pyrimidine-7-carboxylate (3q):**

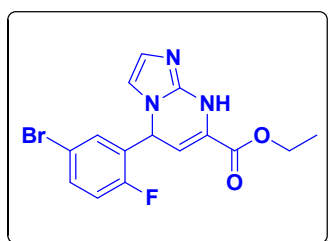

Pale brown solid; yield 30 mg, 45%; MP: 170-172 °C; **<sup>1</sup>H NMR** (300 MHz, Chloroform-*d*):  $\delta$  10.02 (bs, 1H), 7.52 (dd,  $J$  = 7.0 Hz, 1.8 Hz, 1H), 7.27-7.16 (m, 2H), 7.10 (d,  $J$  = 3.6 Hz, 1H), 6.53 (d,  $J$  = 3.6 Hz, 1H), 6.16 (d,  $J$  = 3.9 Hz, 1H), 5.87 (d,  $J$  = 3.9 Hz, 1H), 4.35 (dq,  $J$  = 7.2 Hz, 3.6 Hz, 2H), 1.35 (t,  $J$  = 7.2 Hz, 3H). **<sup>13</sup>C NMR** (126 MHz, DMSO)  $\delta$  161.59, 150.80, 149.25, 141.91, 131.86, 131.60, 131.45, 129.36, 128.01, 127.67, 113.64, 105.78, 62.20, 58.61, 14.34. **LCMS:**  $m/z$  calculated for  $C_{15}H_{13}BrFN_3O_2$ : 365.02; Observed mass: 366.2, 368.2 (M+1, M+3); Anal. Calculated for  $C_{15}H_{13}BrFN_3O_2$ : C, 49.20; H, 3.58; N, 11.48; Found: C, 49.22; H, 3.59; N, 11.50.

**Ethyl 5-(4-bromo-2-chlorophenyl)-5,8-dihydroimidazo[1,2-a]pyrimidine-7-carboxylate (3r):**

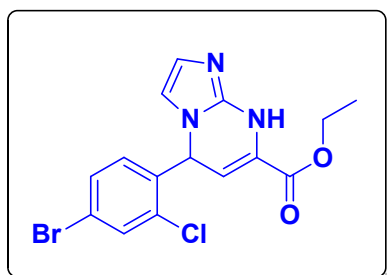

White solid; Yield 34 mg, 54%; MP: 171-173 °C; **<sup>1</sup>H NMR** (500 MHz, DMSO)  $\delta$  10.22 (s, 1H), 7.69 (s, 1H), 7.64 (d,  $J$  = 8.3 Hz, 1H), 7.52 (d,  $J$  = 2.0

Hz, 1H), 7.18 – 7.16 (m, 1H), 6.81 (s, 1H), 6.35 (d,  $J = 3.9$  Hz, 1H), 5.83 (d,  $J = 3.9$  Hz, 1H), 4.25 – 4.20 (m, 2H), 1.31 – 1.24 (m, 3H);  $^{13}\text{C}$  NMR (126 MHz, DMSO)  $\delta$  161.59, 150.80, 149.25, 141.91, 131.86, 131.60, 131.45, 129.36, 128.01, 127.67, 113.64, 105.78, 62.20, 58.61, 14.34; **LCMS**:  $m/z$  calculated for  $\text{C}_{15}\text{H}_{13}\text{BrClN}_3\text{O}_2$ : 381.00; Observed mass: 382.2, 384.2 (M+1, M+3); Anal. Calculated for  $\text{C}_{15}\text{H}_{13}\text{BrClN}_3\text{O}_2$ : C, 47.08; H, 3.42; N, 10.98; Found: C, 47.09; H, 3.44; N, 11.00.

#### Experimental procedure for synthesis of compound (4a-4h):

To a solution of 3-amino 1, 2, 4-triazole (0.30 mmol) in DMF (2.0 mL) was mixed with MBH Acetate of nitro alkene (0.36 mmol) and cesium carbonate (0.6 mmol) and the reaction mixture was heated to 60°C for 4h. After completion of reaction (monitored by LCMS), the reaction mixture was quenched with water (30 mL). The reaction mixture was extracted with ethyl acetate (3x 30 mL). The combined organic layers were dried over anhydrous sodium sulphate, filtered and concentrated over vacuum to give the crude product. To this crude product was added methanol (4 mL) and stirred for 30 min at RT. A white precipitate was obtained which was filtered gave the product (55% - 70%). The mother liquid contains a small amount of product along with small amount of other region isomer by LCMS.

#### Ethyl-7-phenyl-4,7-dihydro-[1,2,4]triazolo[1,5-a]pyrimidine-5-carboxylate-(4a):

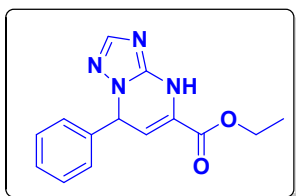

White solid; yield 60 mg, 60%; MP: 182-184 °C;  $^1\text{H}$  NMR (400 MHz, Chloroform- $d$ ):  $\delta$  (ppm) 10.23 (bs, 1H), 7.78 (s, 1H), 7.42-7.28 (m, 5H), 6.22 (d,  $J = 4.0$  Hz, 1H), 5.94 (d,  $J = 4.0$  Hz, 1.6 Hz, 1H), 4.38 (dq,  $J = 7.2$  Hz, 3.6 Hz, 2H), 1.36 (t,  $J = 7.2$  Hz, 3H).  $^{13}\text{C}$  NMR (75 MHz, Chloroform- $d$ )  $\delta$  (ppm) 161.82, 150.06, 148.99, 139.91, 129.02, 128.79, 127.42, 127.12, 106.10, 62.13, 60.63, 14.17; **LCMS**:  $m/z$  calculated for  $\text{C}_{14}\text{H}_{14}\text{N}_4\text{O}_2$ : 270.11; Observed mass: 271.2 (M+1); Anal. Calculated for  $\text{C}_{14}\text{H}_{14}\text{N}_4\text{O}_2$ : C, 62.21; H, 5.22; N, 20.73; Found: C, 62.22; H, 5.24; N, 20.75.

#### Ethyl-7-(4-methoxyphenyl)-4,7-dihydro-[1,2,4]triazolo[1,5-a]pyrimidine-5-carboxylate (4b):

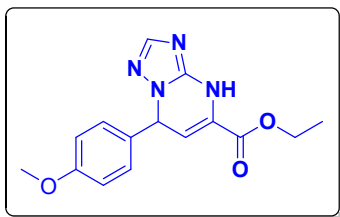

White solid; yield 70 mg, 65%; MP: 180-182 °C; **<sup>1</sup>H NMR** (300 MHz, Chloroform-*d*): δ 9.86 (bs, 1H), 7.74 (s, 1H), 7.24 (dd, *J* = 9.0 Hz, 2.7 Hz, 2H), 6.92 (d, *J* = 9.0 Hz, 2H), 6.16 (d, *J* = 3.9 Hz, 1H), 5.93 (d, *J* = 3.9 Hz, 1H), 4.36 (dq, *J* = 7.2 Hz, 3.6 Hz, 2H), 3.81 (s, 3H), 1.36 (t, *J* = 7.2 Hz, 3H). **<sup>13</sup>C NMR** (75 MHz, Chloroform-*d*) δ 161.82, 159.98, 149.93, 148.64, 132.05, 128.54, 127.24, 114.38, 106.35, 62.15, 60.05, 55.33, 14.16. LCMS: *m/z* calculated for C<sub>15</sub>H<sub>16</sub>N<sub>4</sub>O<sub>3</sub>: 300.12; Observed mass: 301.2 (M+1); Anal. Calculated for C<sub>15</sub>H<sub>16</sub>N<sub>4</sub>O<sub>3</sub>: C, 59.99; H, 5.37; N, 18.66; Found: C, 59.98; H, 5.39; N, 18.68.

**Ethyl-7-(3-(trifluoromethyl)phenyl)-4,7-dihydro-[1,2,4]triazolo[1,5-a]pyrimidine-5-carboxylate (4c):**

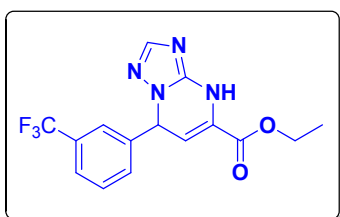

White solid; yield 70 mg, 58%; MP: 174-176 °C; **<sup>1</sup>H NMR** (300 MHz, Chloroform-*d*): δ 10.45 (bs, 1H), 7.80 (s, 1H), 7.64-7.48 (m, 4H), 6.30 (d, *J* = 3.9 Hz, 1H), 5.91 (d, *J* = 3.9 Hz, 1H), 4.40 (dq, *J* = 7.2 Hz, 3.6 Hz, 2H), 1.37 (t, *J* = 7.2 Hz, 3H). **<sup>13</sup>C NMR** (126 MHz, CDCl<sub>3</sub>) δ 161.53, 150.37, 148.82, 140.73, 131.62, 130.63, 129.63, 127.79, 125.76, 123.89, 105.05, 62.41, 60.25, 14.13. **LCMS**: *m/z* calculated for C<sub>15</sub>H<sub>13</sub>F<sub>3</sub>N<sub>4</sub>O<sub>2</sub>: 338.12; Observed mass: 339.2 (M+1); Anal. Calculated for C<sub>15</sub>H<sub>13</sub>F<sub>3</sub>N<sub>4</sub>O<sub>2</sub>: C, 53.26; H, 3.87; N, 16.56; Found: C, 53.28; H, 3.89; N, 16.58.

**Ethyl-7-(3,4-dichlorophenyl)-4,7-dihydro-[1,2,4]triazolo[1,5-a]pyrimidine-5-carboxylate (4d):**

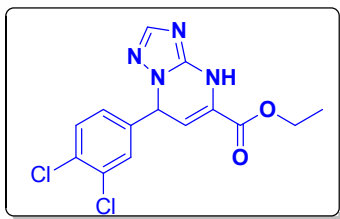

White solid; yield 75 mg, 62%; MP: 185-187 °C; <sup>1</sup>H NMR (300 MHz, Chloroform-*d*): δ 9.80 (bs, 1H), 7.77 (s, 1H), 7.46 (dd, *J* = 8.2 Hz, 1H), 7.28-7.26 (m, 1H), 7.18 (d, *J* = 8.4 Hz, 1H), 6.18 (d, *J* = 3.9 Hz, 1H), 5.87 (d, *J* = 3.9 Hz, 1H), 4.38 (dq, *J* = 7.2 Hz, 3.6 Hz, 2H), 1.37 (t, *J* = 7.2 Hz, 3H). <sup>13</sup>C NMR (126 MHz, DMSO) δ 161.51, 150.68, 140.81, 139.08, 136.15, 128.84, 124.65, 103.72, 62.27, 59.33, 14.34. LCMS: *m/z* calculated for C<sub>14</sub>H<sub>12</sub>Cl<sub>2</sub>N<sub>4</sub>O<sub>2</sub>: 338.03; Observed mass: 339.2 (M+1); Anal. Calculated for C<sub>14</sub>H<sub>12</sub>Cl<sub>2</sub>N<sub>4</sub>O<sub>2</sub>: C, 49.58; H, 3.57; N, 16.52; Found: C, 49.60; H, 3.58; N, 16.54.

**Ethyl-7-(4-bromophenyl)-4,7-dihydro-[1,2,4]triazolo[1,5-a]pyrimidine-5-carboxylate (4e):**

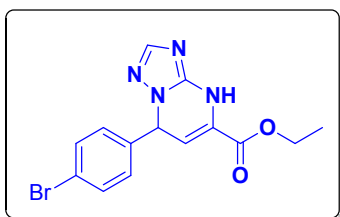

White solid; yield 83 mg, 67%; MP: 191-193 °C; <sup>1</sup>H NMR (300 MHz, Chloroform-*d*): δ 9.65 (bs, 1H), 7.75 (s, 1H), 7.53 (d, *J* = 8.4 Hz, 2H), 7.19 (dd, *J* = 8.4 Hz, 1.8 Hz, 2H), 6.18 (d, *J* = 3.9 Hz, 1H), 5.90 (d, *J* = 3.9 Hz, 1H), 4.36 (dq, *J* = 7.2 Hz, 3.0 Hz, 2H), 1.36 (t, *J* = 7.2 Hz, 3H). <sup>13</sup>C NMR (300 MHz, Chloroform-*d*): 161.58, 150.12, 148.70, 138.71, 132.20, 128.84, 128.57, 127.57, 123.01, 105.39, 62.33, 60.02, 14.14. LCMS: *m/z* calculated for C<sub>14</sub>H<sub>13</sub>BrN<sub>4</sub>O<sub>2</sub>: 348.02; Observed mass: 349.2, 351.2 (M+1, M+3); Anal. Calculated for C<sub>14</sub>H<sub>13</sub>BrN<sub>4</sub>O<sub>2</sub>: C, 48.16; H, 3.75; N, 16.05; Found: C, 48.18; H, 3.76; N, 16.07.

**Ethyl-7-(4-hydroxyphenyl)-4,7-dihydro-[1,2,4]triazolo[1,5-a]pyrimidine-5-carboxylate (4f):**

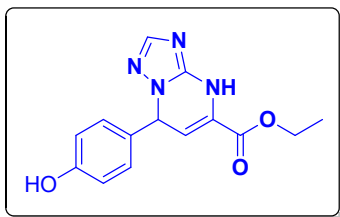

White solid; yield 53 mg, 52%; MP: 173-175 °C; <sup>1</sup>H NMR (400 MHz, DMSO) δ 10.02 (s, 1H), 7.62 (s, 1H), 7.17 – 7.11 (m, 2H), 6.95 – 6.88 (m, 2H), 6.22 (d, *J* = 4.0 Hz, 1H), 5.79 (d, *J* = 4.0 Hz, 1H), 4.30 – 4.19 (m, 2H), 1.26 (t, *J* = 7.1 Hz, 3H). <sup>13</sup>C NMR (75 MHz, Chloroform-*d*) δ 161.98, 159.93, 149.82, 148.54 132.05, 128.64, 126.35, 114.15, 107.24, 62.38, 60.17, 14.04. **LCMS:** *m/z* calculated for C<sub>14</sub>H<sub>14</sub>N<sub>4</sub>O<sub>3</sub>: 286.11; Observed mass: 287.2 (M+1); Anal. Calculated for C<sub>14</sub>H<sub>14</sub>N<sub>4</sub>O<sub>3</sub>: C, 58.73; H, 4.93; N, 19.57; Found: C, 58.75; H, 4.95; N, 19.59.

**Ethyl-7-(2-bromopyridin-3-yl)-4,7-dihydro-[1,2,4]triazolo[1,5-a]pyrimidine-5-carboxylate (4g):**

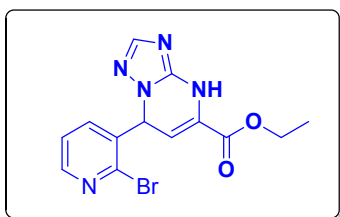

Brown solid; yield 77 mg, 62%; MP: 197-200 °C; <sup>1</sup>H NMR (400 MHz, Chloroform-*d*): δ 9.88 (bs, 1H), 8.36 (s, 1H), 7.83 (m, 1H), 7.28-7.16 (m, 2H), 6.67 (d, *J* = 4.0 Hz, 1H), 6.01 (d, *J* = 4.0 Hz, 1H), 4.37 (q, *J* = 7.2 Hz, 2H), 1.38 (t, *J* = 7.2 Hz, 3H). <sup>13</sup>C NMR (101 MHz, DMSO) δ 160.50 (m), 150.81, 150.21, 149.16, 141.20, 136.84, 135.49, 128.86, 124.66, 103.72, 62.27, 59.33, 14.34; **LCMS:** *m/z* calculated for C<sub>13</sub>H<sub>12</sub>BrN<sub>5</sub>O<sub>2</sub>: 349.02; Observed mass: 350.2, 352.2 (M+1, M+3); Anal. Calculated for C<sub>13</sub>H<sub>12</sub>BrN<sub>5</sub>O<sub>2</sub>: C, 44.59; H, 3.45; N, 20.00; Found: C, 44.58; H, 3.46; N, 20.02.

**Ethyl-7-(5-bromo-2-fluorophenyl)-4,7-dihydro-[1,2,4]triazolo[1,5-a]pyrimidine-5-carboxylate (4h):**

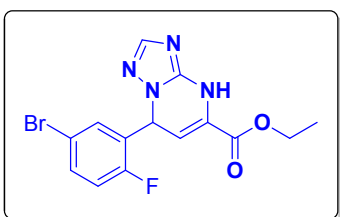

Plae brown solid; yield 35 mg, 53%; MP: 192-194 °C; <sup>1</sup>H NMR (300 MHz, DMSO-*d*6): δ 10.18 (bs, 1H), 7.70-7.60 (m, 3H), 7.48 (d, *J* = 7.2 Hz, 1H), 6.45

(d,  $J = 3.9$  Hz, 1H), 5.86 (d,  $J = 3.9$  Hz, 1H), 4.24 (q,  $J = 7.2$  Hz, 2H), 1.26 (t,  $J = 7.2$  Hz, 3H).  $^{13}\text{C}$  NMR (75MHz, DMSO- $d_6$ )  $\delta$  164.40, 152.93, 145.45, 140.82, 128.59, 128.41, 126.42, 125.18, 123.64, 65.93, 60.17, 13.14. LCMS:  $m/z$  calculated for  $\text{C}_{14}\text{H}_{12}\text{BrFN}_4\text{O}_2$ : 366.01; Observed mass: 367.1, 369.1 (M+1, M+3); Anal. Calculated for  $\text{C}_{14}\text{H}_{12}\text{BrFN}_4\text{O}_2$ : C, 45.80; H, 3.29; N, 15.26; Found: C, 45.82; H, 3.30; N, 15.28.

#### Experimental procedure for synthesis of compound (5a & 5b):

To a solution of 5-amino tetrazole (0.075 mmol) in DMF (1.0 mL) was mixed with MBH Acetate of nitro alkene (0.09 mmol) and cesium carbonate (0.15 mmol) and the reaction mixture was heated to 60°C for 4h. After completion of reaction (monitored by LCMS), the reaction mixture was quenched with water (10 mL). The reaction mixture was extracted with ethyl acetate (3x 10 mL). The combined organic layers were dried over anhydrous sodium sulphate, filtered and concentrated over vacuum to give the crude product. To this crude product was added methanol (2 mL) and stirred for 30 min at RT. A white precipitate was obtained which was filtered gave the product (70% - 75%). The mother liquid contains a small amount of product along with small amount of other region isomer by LCMS.

#### Ethyl-7-phenyl-4,7-dihydrotetrazolo[1,5-a]pyrimidine-5-carboxylate (5a):

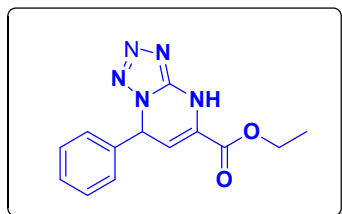

yield 18 mg, 75%; MP: 201-204 °C;  $^1\text{H}$  NMR (300 MHz, Chloroform- $d$ ):  $\delta$  7.62-7.55 (m, 3H), 7.35-7.25 (m, 2H), 6.67 (d,  $J = 3.9$  Hz, 1H), 6.02 (d,  $J = 3.9$  Hz, 1H), 4.36 (q,  $J = 7.2$  Hz, 2H), 1.36 (t,  $J = 7.2$  Hz, 3H). LCMS:  $m/z$  calculated for  $\text{C}_{13}\text{H}_{13}\text{N}_5\text{O}_2$ : 271.11; Observed mass: 272.2 (M+1).

#### Ethyl-7-(4-methoxyphenyl)-4,7-dihydrotetrazolo[1,5-a]pyrimidine-5-carboxylate (5b):

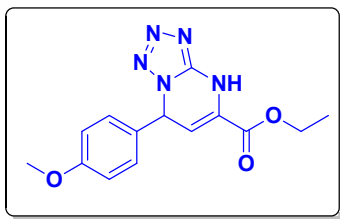

yield 19 mg, 72%; MP: 200-202 °C;  $^1\text{H}$  NMR (300 MHz, DMSO-*d*<sub>6</sub>):  $\delta$  10.01 (s, 1H), 7.14 (d,  $J$  = 8.7 Hz, 2H), 6.92 (d,  $J$  = 8.7 Hz, 2H), 6.21 (d,  $J$  = 3.9 Hz, 1H), 5.78 (dd,  $J$  = 3.9 Hz, 1.5 Hz, 1H), 4.25 (dq,  $J$  = 7.2 Hz, 2H), 3.72 (s, 3H), 1.26 (t,  $J$  = 7.2 Hz, 3H). **LCMS:**  $m/z$  calculated for C<sub>14</sub>H<sub>15</sub>N<sub>5</sub>O<sub>3</sub>: 301.12; Observed mass: 302.2 (M+1).

**Figure 1:** Imidazopyrimidine containing drugs

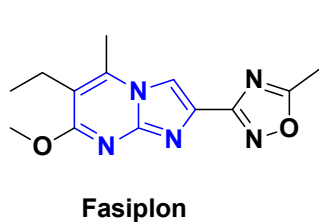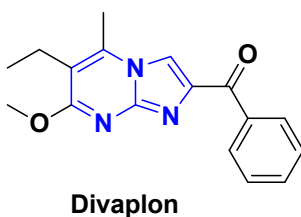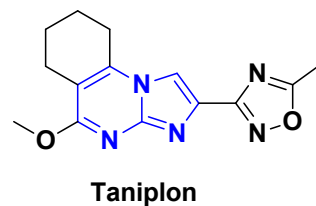

**Figure 2:** AChE inhibitors clinically used for the treatment of AD

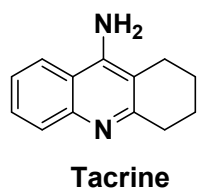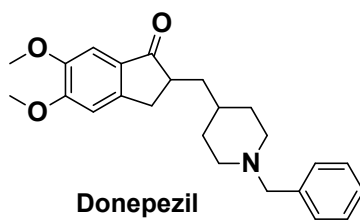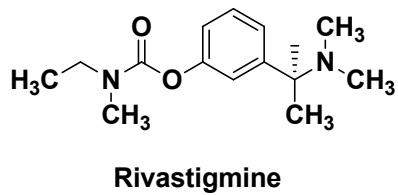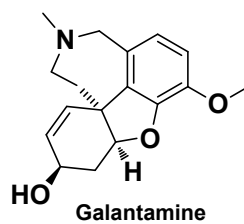

**Figure 3:** ORTEP diagram of (a) compound **3e** and (b) compound **4b**

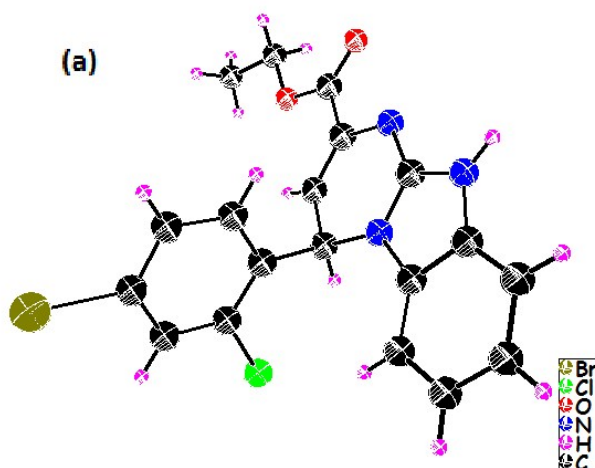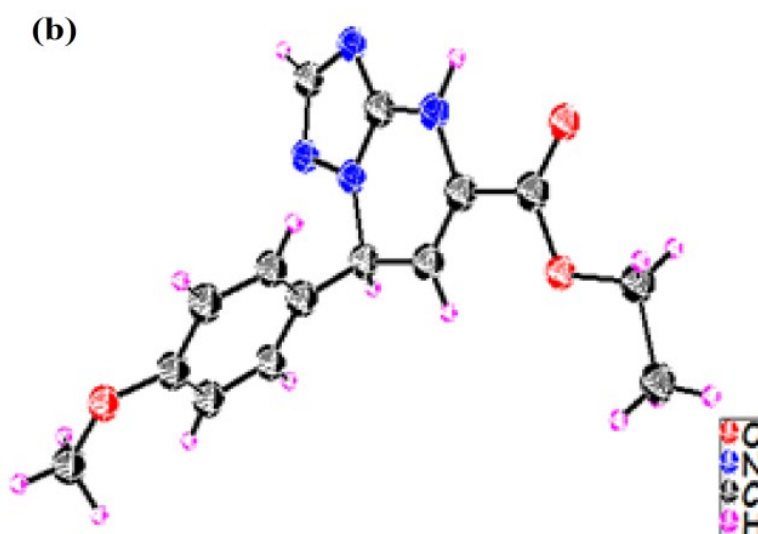

**Table 1.** Screening of reaction conditions <sup>a</sup>

| 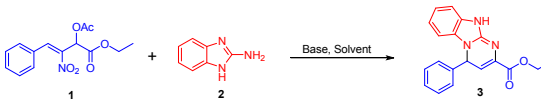 |                                 |                                 |      |                           |
|------------------------------------------------------------------------------------|---------------------------------|---------------------------------|------|---------------------------|
| S.No                                                                               | Base                            | Solvent                         | Temp | Yield <sup>b</sup><br>(%) |
| 1                                                                                  | --                              | THF                             | RT   | 0                         |
| 2                                                                                  | --                              | THF                             | 70°C | 0                         |
| 3                                                                                  | Et <sub>3</sub> N               | THF                             | RT   | 20                        |
| 4                                                                                  | DIPEA                           | THF                             | RT   | 22                        |
| 5                                                                                  | Pyridine                        | THF                             | RT   | 40                        |
| 6                                                                                  | 2,6-Lutidine                    | THF                             | RT   | 40                        |
| 7                                                                                  | DABCO                           | THF                             | RT   | 44                        |
| 8                                                                                  | DBU                             | THF                             | RT   | 49                        |
| 9                                                                                  | K <sub>2</sub> CO <sub>3</sub>  | THF                             | RT   | 60                        |
| 10                                                                                 | Cs <sub>2</sub> CO <sub>3</sub> | THF                             | RT   | 80                        |
| 11                                                                                 | Cs <sub>2</sub> CO <sub>3</sub> | CH <sub>2</sub> Cl <sub>2</sub> | RT   | 45                        |
| 12                                                                                 | Cs <sub>2</sub> CO <sub>3</sub> | CHCl <sub>3</sub>               | RT   | 48                        |
| 13                                                                                 | Cs <sub>2</sub> CO <sub>3</sub> | MeOH                            | RT   | 60                        |
| 14                                                                                 | Cs <sub>2</sub> CO <sub>3</sub> | EtOH                            | RT   | 68                        |
| 15                                                                                 | Cs <sub>2</sub> CO <sub>3</sub> | CH <sub>3</sub> CN              | RT   | 82                        |
| 16                                                                                 | Cs <sub>2</sub> CO <sub>3</sub> | 1,4-dioxane                     | RT   | 81                        |

## Biology

### Enzyme Inhibition studies

The *in vitro* inhibitory effect of newly synthesized ligands was assessed by Ellman's method<sup>22</sup> using AMPLITE™ AChE assay kit (AAT Bioquest, Inc., Sunnyvale, CA). The assay system consists of AChE from electric eel (EC 3.1.1.7), 5,5-dithiobis-(2-nitrobenzoic acid) (DTNB, known as Ellman's reagent) and acetylcholine. The assay procedure is as follows, an aliquots (total volume 100  $\mu$ L) was prepared by mixing 5.7 nMAChE (prepared in 0.1 % of BSA containing distilled water) with acetylcholine (500  $\mu$ M) and DTNB in a reaction buffer of pH 7.4. As a result of enzyme substrate interaction, the yellow colour formation was monitored and measured at 405 nm using a spectrophotometer at a time interval 2 minutes each for 20 minutes. Later the optical density was plotted against time. The same experiment (in triplicate) was repeated by incubating (15 minutes) the enzyme with different ligands. The relative activities of all ligands were expressed and compared with that of native enzyme activity. Finally the half maximal inhibitory concentration ( $IC_{50}$ ) was determined for each ligands.

**Table 2:** The *in vitro* AChE inhibitory profile of compounds 3a-3j

| S. No | Compound | % of Inhibition at 208 nM | hAChE $IC_{50}$ (nM)+ SD |
|-------|----------|---------------------------|--------------------------|
| 1     | 3a       | 53                        | 70.78 $\pm$ 10.01        |

|    |              |    |                    |
|----|--------------|----|--------------------|
| 2  | 3b           | 70 | $52.64 \pm 1.07$   |
| 3  | 3c           | 62 | $91.8 \pm 3.6$     |
| 4  | 3d           | 76 | $46.86 \pm 1.16$   |
| 5  | 3e           | 74 | $42.52 \pm 5.17$   |
| 6  | 3g           | 69 | $71.48 \pm 5.04$   |
| 7  | 3h           | 61 | $67.32 \pm 4.94$   |
| 8  | 3i           | 67 | $52.58 \pm 15.65$  |
| 9  | 3j           | 65 | $68.4 \pm 7.94$    |
| 10 | Tacrine      |    | $551.58 \pm 19.17$ |
| 11 | Galanthamine |    | $360 \pm 10^1$     |

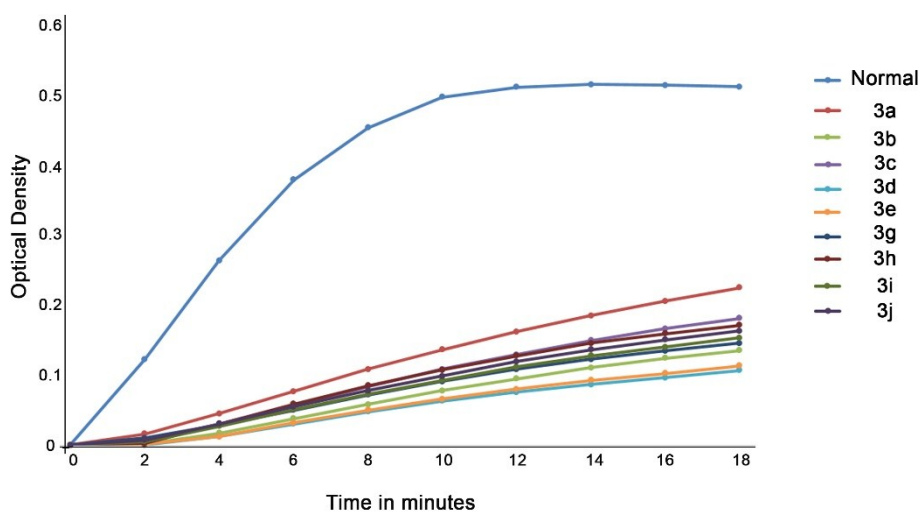

**Figure 4:** Velocity time graph obtained for native enzyme and in presence of compounds (208 nM)

**IC50 graphs for compounds 3a-3j**

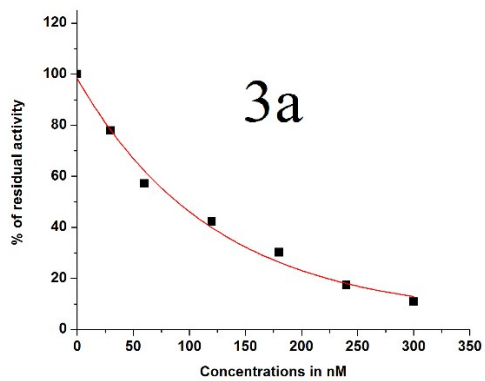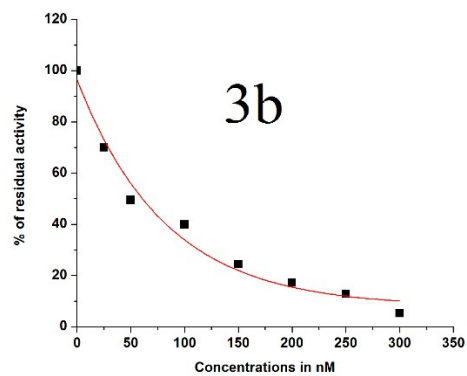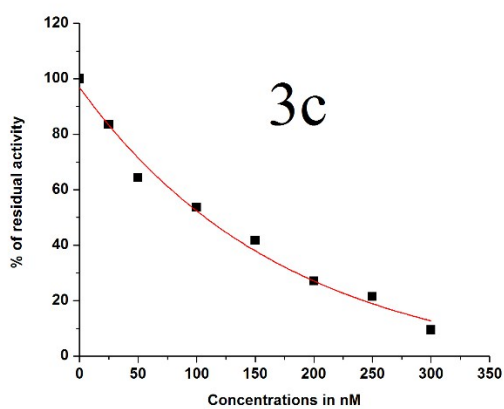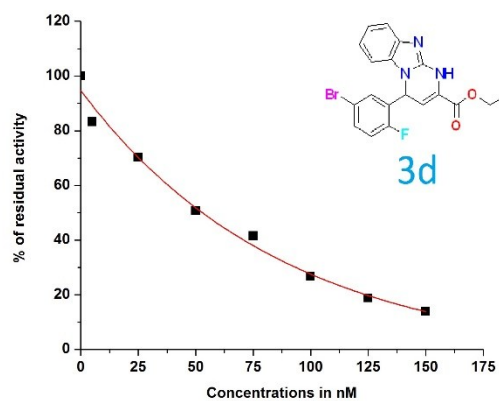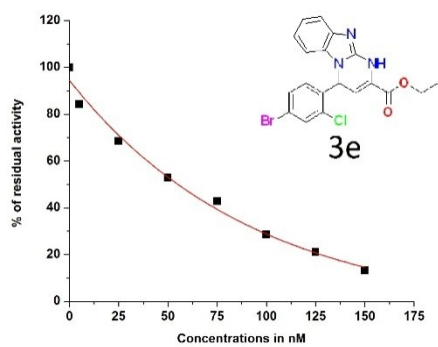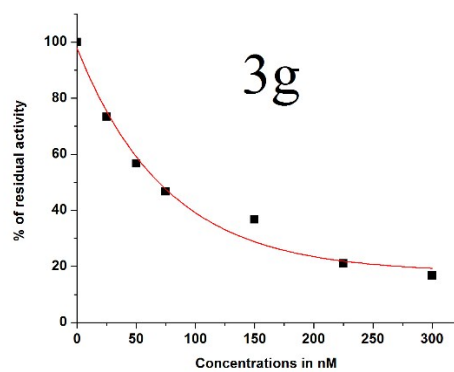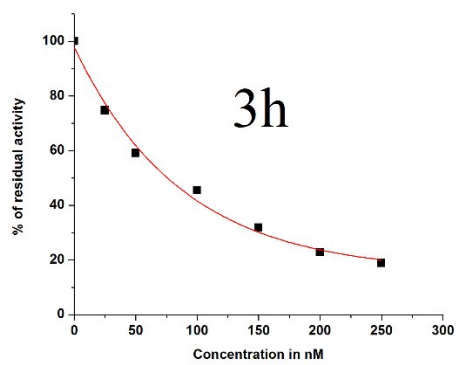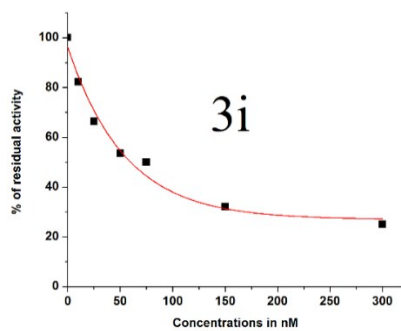

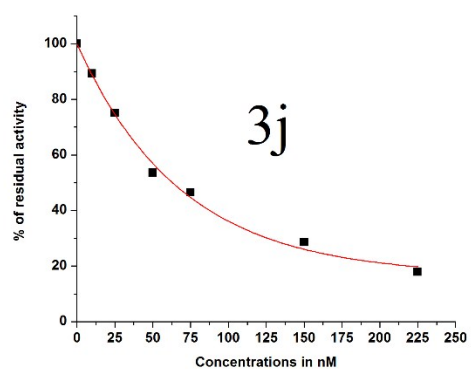

**Figure 5:** Relative residual activity of AChE plotted against the different concentrations of the most potent compounds **3d** (a) and **3e** (b).

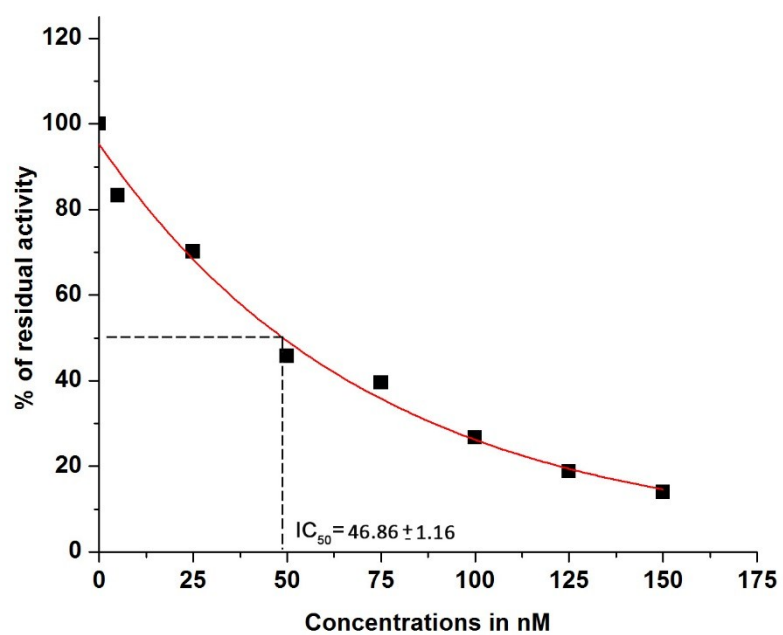

(a)

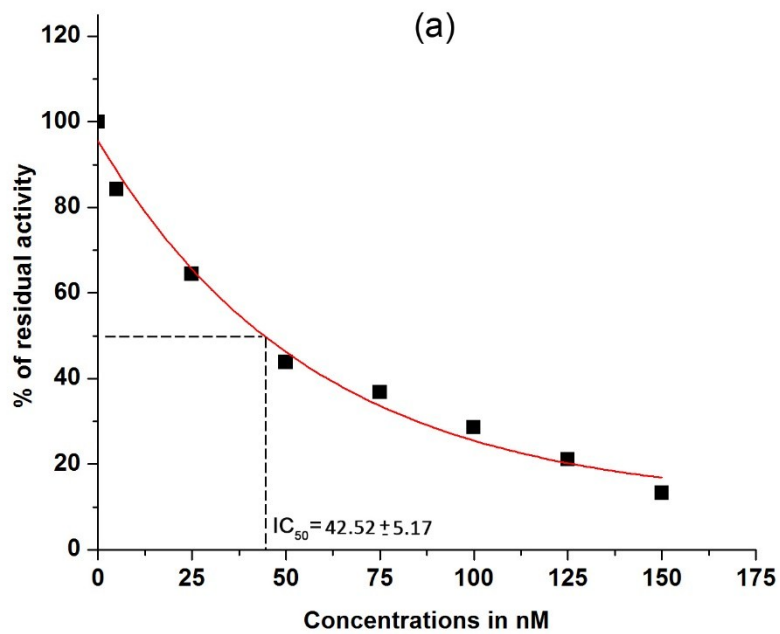

(b)

**Table 3:** ADME profile of the compounds predicted by QikProp program

| Compound | MW<br>( $\leq 450$ Da) | HBD<br>( $\leq 3$ ) | HBA<br>( $\leq 7$ ) | LogP<br>( $\leq 5$ ) | CNS<br>( $\geq 0$ ) | Rotor<br>( $\leq 7$ ) | N and O<br>( $\leq 7$ ) |
|----------|------------------------|---------------------|---------------------|----------------------|---------------------|-----------------------|-------------------------|
|----------|------------------------|---------------------|---------------------|----------------------|---------------------|-----------------------|-------------------------|

|    |     |   |   |      |    |   |   |
|----|-----|---|---|------|----|---|---|
| 3a | 319 | 1 | 3 | 4.35 | 0  | 2 | 5 |
| 3b | 398 | 1 | 3 | 4.92 | 0  | 2 | 5 |
| 3c | 333 | 1 | 3 | 4.66 | 0  | 2 | 5 |
| 3d | 416 | 1 | 3 | 5.01 | 0  | 2 | 5 |
| 3e | 433 | 1 | 3 | 5.32 | 0  | 2 | 5 |
| 3g | 417 | 1 | 4 | 4.41 | 0  | 2 | 6 |
| 3h | 335 | 2 | 4 | 3.58 | -2 | 3 | 6 |
| 3i | 337 | 1 | 3 | 4.53 | 0  | 2 | 5 |
| 3j | 348 | 1 | 5 | 3.51 | -2 | 3 | 7 |

| Compound | BBB<br>(-1.2 -1.2) | SASA<br>(320-735 Å <sup>2</sup> ) | Volume<br>(≤1250 Å <sup>3</sup> ) | PSA<br>(60 –70 Å <sup>2</sup> ) | Caco<br>(≥ 500 nm/s) | MDCK<br>(≥ 500 nm/s) | %<br>HOA |
|----------|--------------------|-----------------------------------|-----------------------------------|---------------------------------|----------------------|----------------------|----------|
| 3a       | -0.51              | 605                               | 1052                              | 64                              | 1171                 | 587                  | 100      |
| 3b       | -0.35              | 634                               | 1105                              | 64                              | 1171                 | 1554                 | 100      |
| 3c       | -0.54              | 637                               | 1112                              | 64                              | 1171                 | 587                  | 100      |
| 3d       | -0.27              | 641                               | 1118                              | 64                              | 1170                 | 2391                 | 100      |
| 3e       | -0.22              | 649                               | 1141                              | 63                              | 1174                 | 3126                 | 100      |
| 3g       | -0.51              | 634                               | 1106                              | 76                              | 675                  | 1362                 | 100      |
| 3h       | -1.12              | 618                               | 1077                              | 86                              | 355                  | 161                  | 94       |
| 3i       | -0.43              | 612                               | 1065                              | 64                              | 1169                 | 899                  | 100      |
| 3j       | -1.16              | 620                               | 1090                              | 96                              | 319                  | 144                  | 92       |

**Table 4: The binding energetics of the compounds at the active site of hAChE**

| Name         | Glide score | Binding energy | Interacting residues              |
|--------------|-------------|----------------|-----------------------------------|
| 3a           | -8.24       | -74.38         | F338,H447,Y337 and W86            |
| 3b           | -8.62       | -75.55         | F338,H447, Y337, Y124 and W86     |
| 3c           | -8.09       | -72.60         | F338,H447,Y124,Y337 and W86       |
| 3d           | -9.15       | -87.03         | F338,H447, Y341,Y124,Y337 andW86  |
| 3e           | -9.79       | -92.26         | F338,H447,Y341,Y337, Y124 and W86 |
| 3g           | -8.70       | -85.55         | F338,Y124,Y337 and W86            |
| 3h           | -9.11       | -75.07         | F338,Y124,Y133, G121 and W86      |
| 3i           | -8.90       | -76.65         | F338,H447,Y124,Y337 and W86       |
| 3j           | -9.04       | -74.13         | F338,H447,Y124,Y337 andW86        |
| Galanthamine | -9.69       | -81.51         | F338,S203,E202 and Y337           |

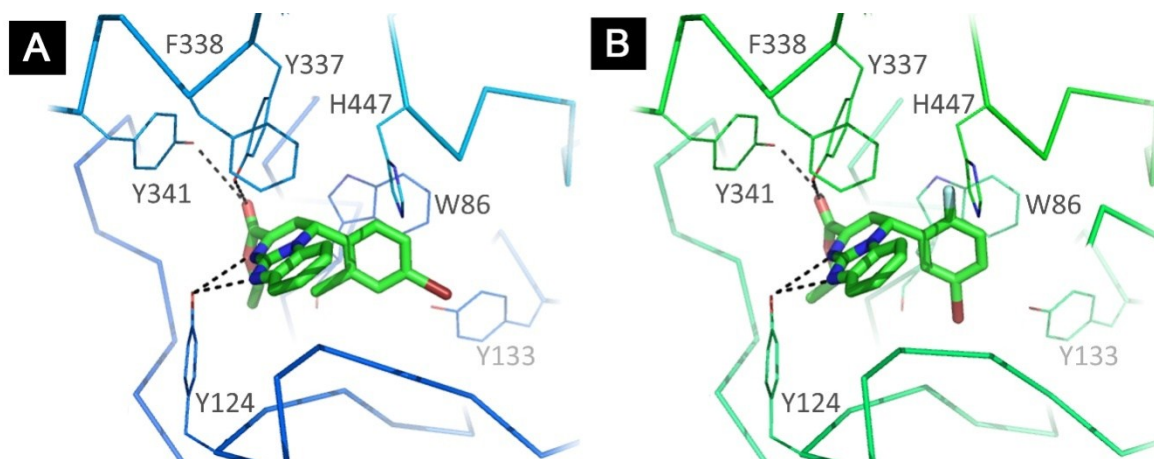

**Figure 6:** Binding pattern of compounds 3e (A) and 3d (B) at the active site of hAChE. The protein residues are shown in lines and the compounds are shown in stick. The hydrogen bonds are indicated by dotted lines

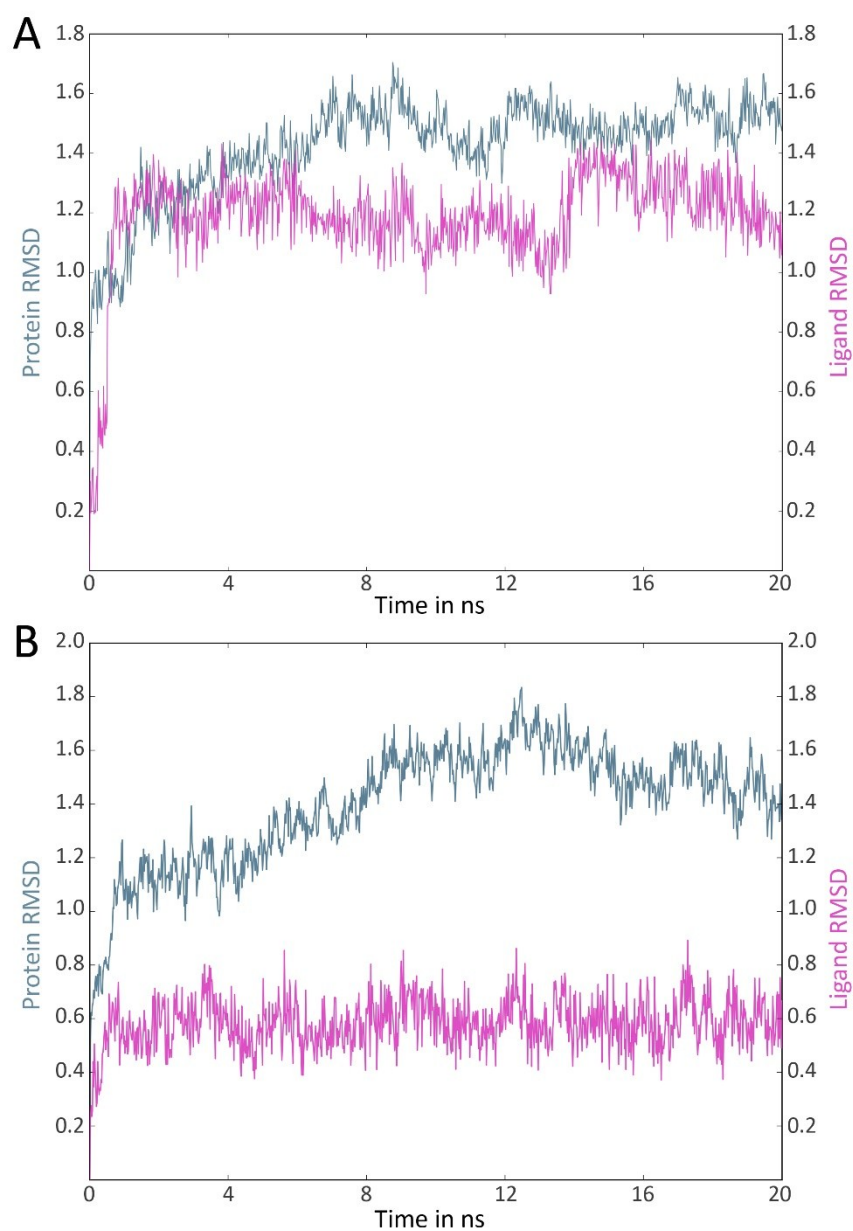

**Figure 7:** The RMSD graph of C $\alpha$  (blue in colour), ligand displacement (pink in colour) of 3d (A) 3e (B) respectively

# <sup>1</sup>H NMR for compound 3a

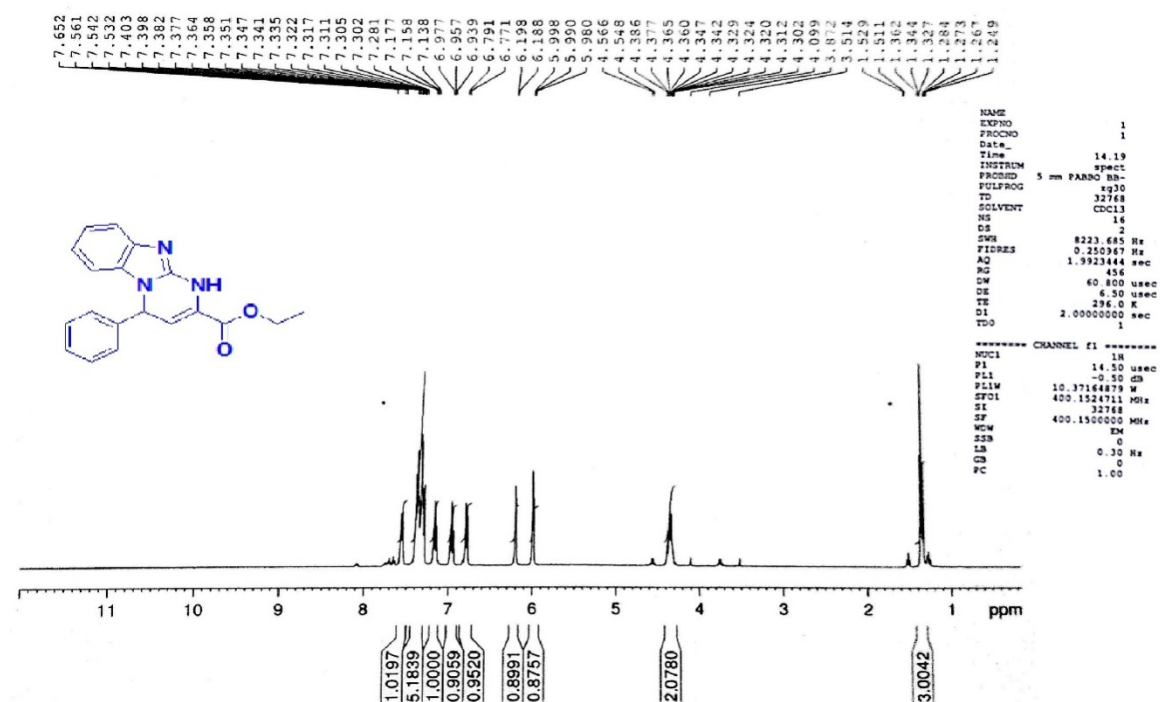

# <sup>13</sup>C for compound 3a

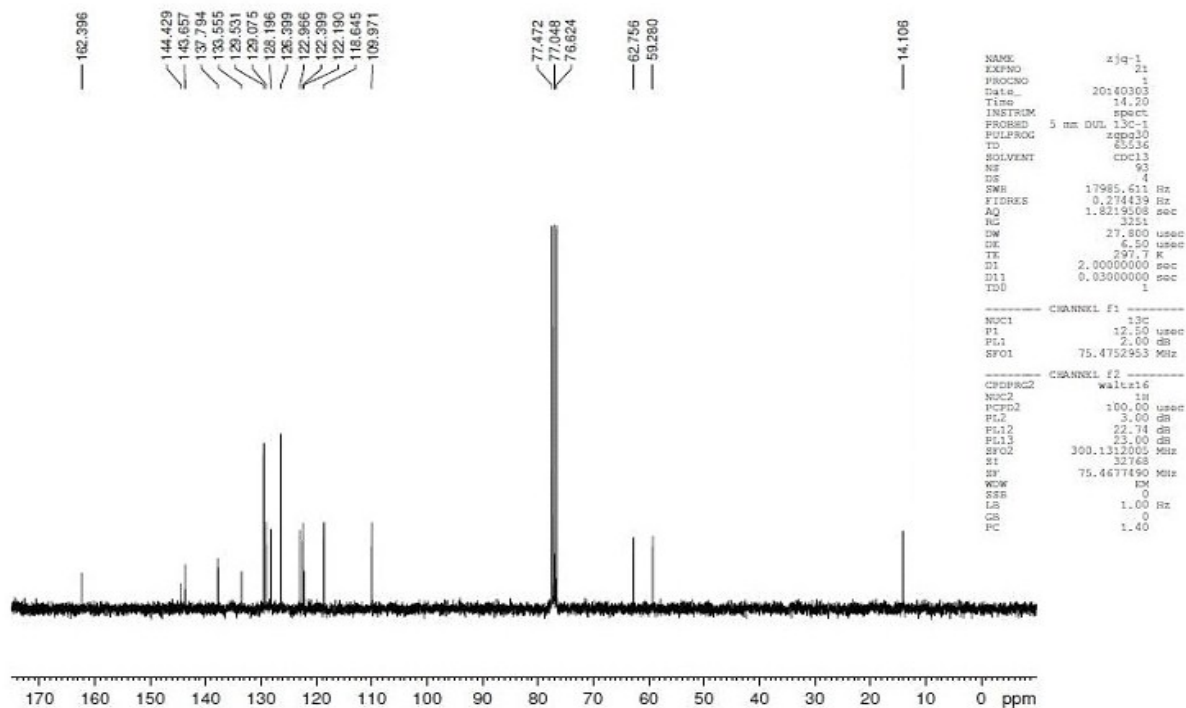

# <sup>1</sup>H NMR for compound 3b

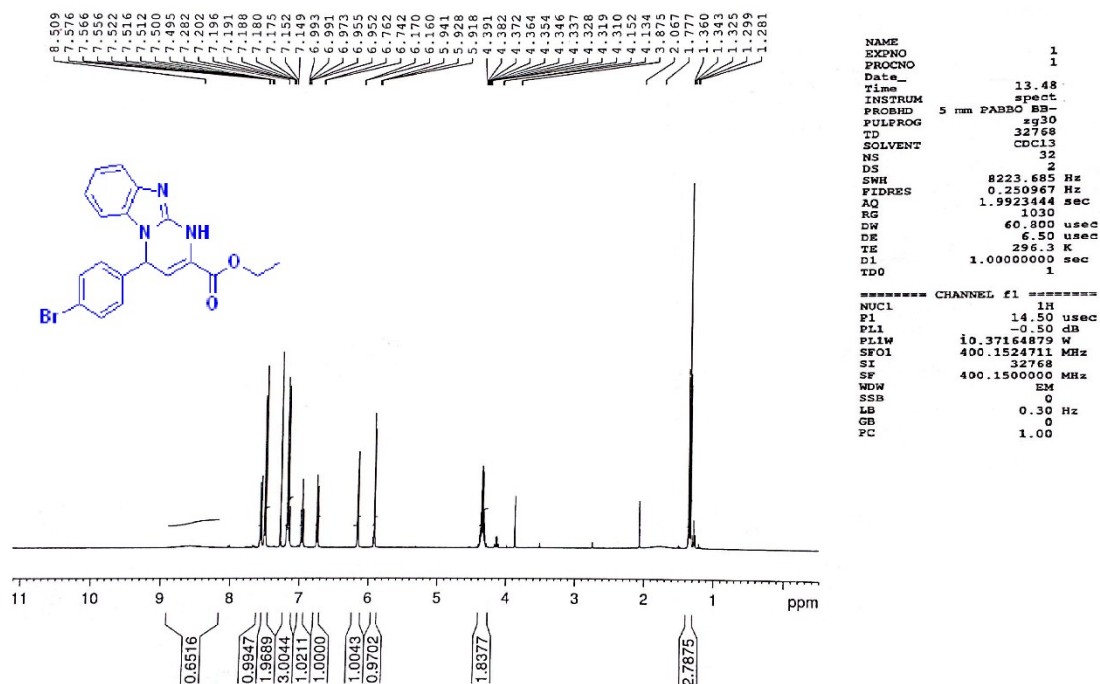

# <sup>13</sup>C NMR for compound 3b

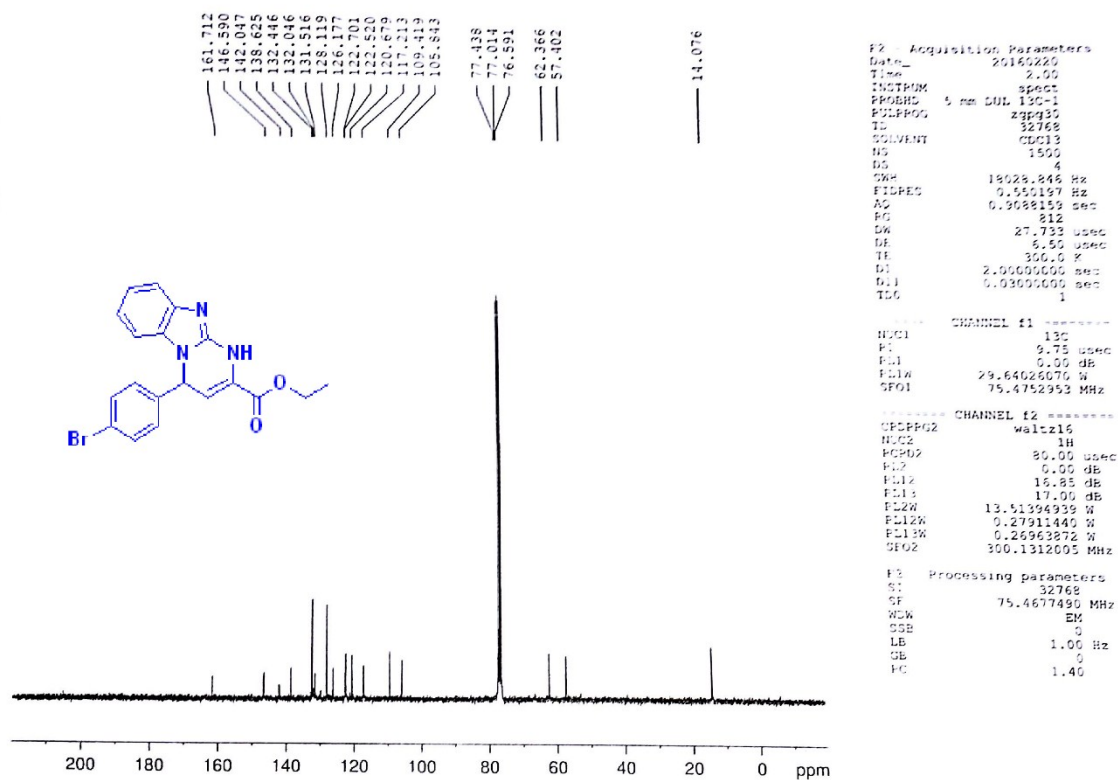

<sup>1</sup>H NMR for compound 3c (DMSO-d<sub>6</sub>, 400 MHz)

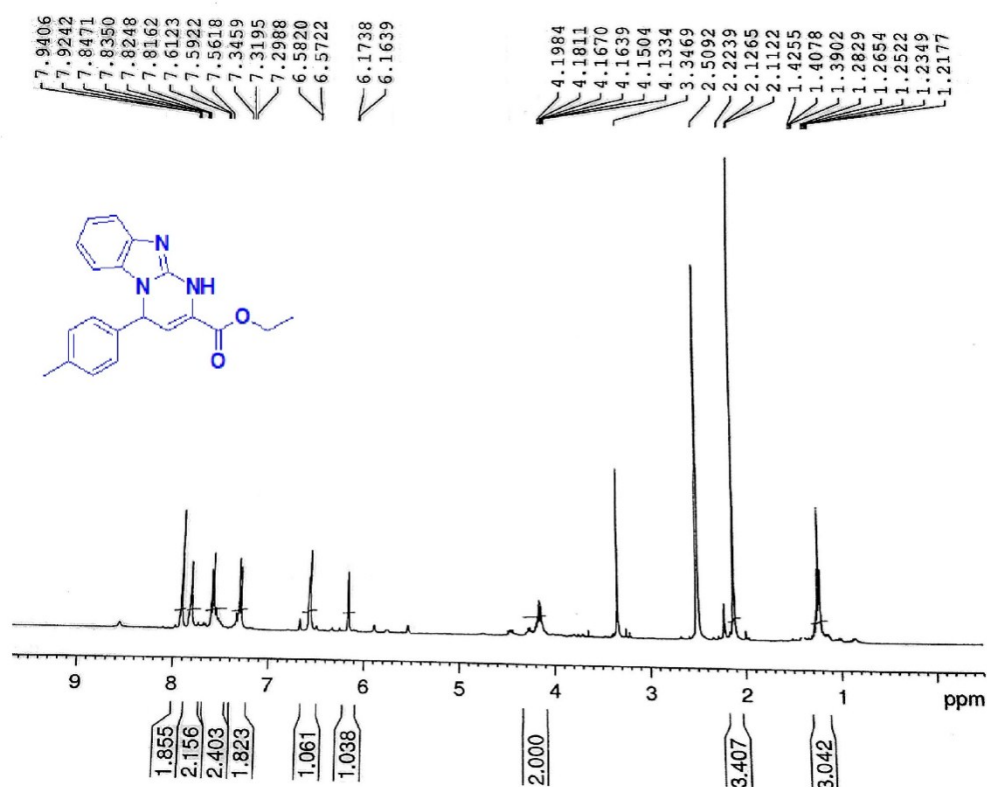

<sup>13</sup>C NMR for compound 3c

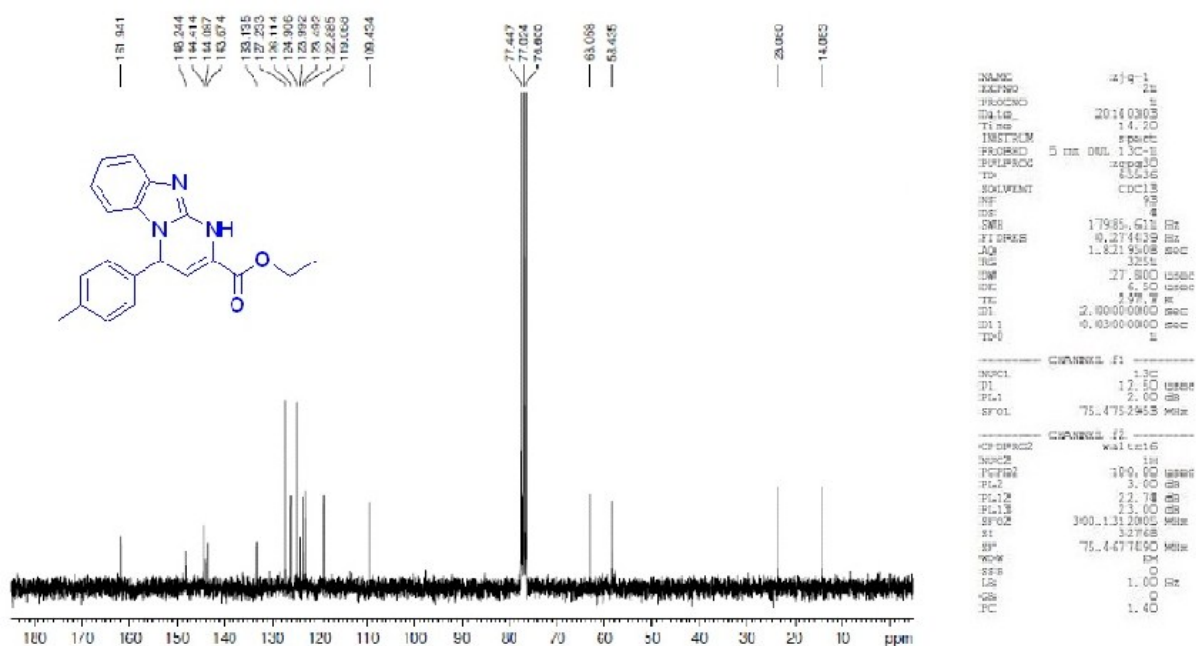

$^1\text{H}$  NMR for compound 3d (DMSO- $d_6$ , 300 MHz)

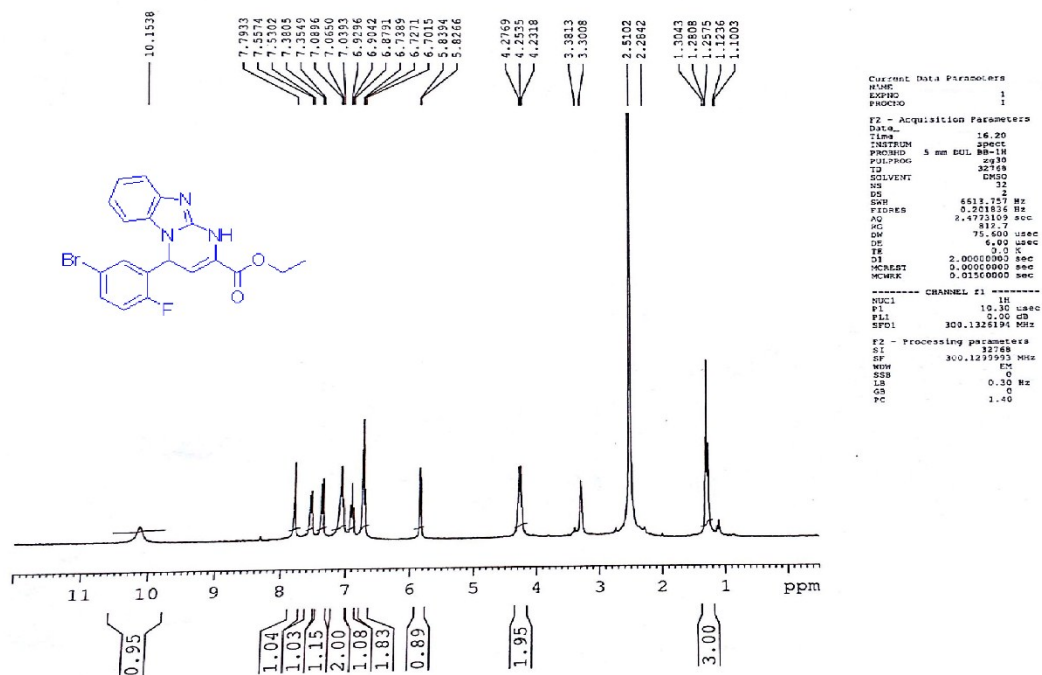

$^{13}\text{C}$  NMR for compound 3d

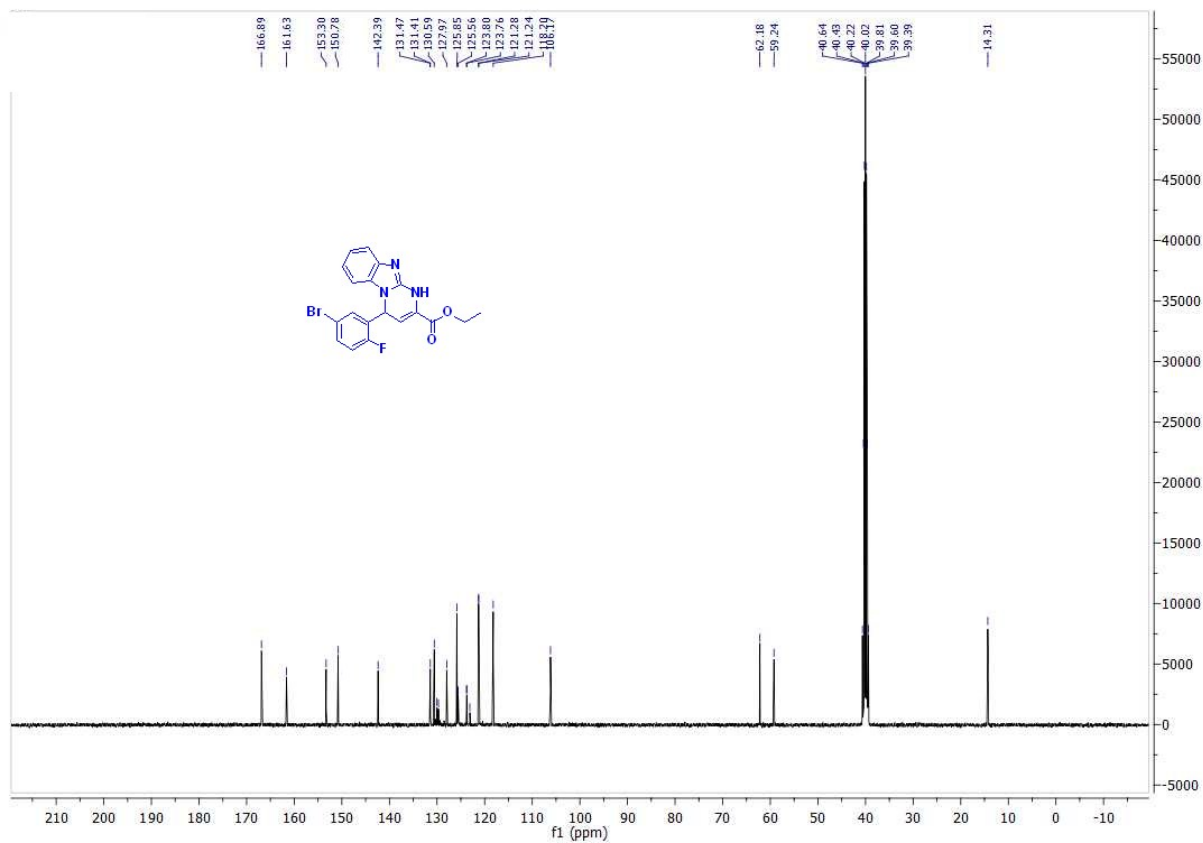

# <sup>1</sup>H NMR for compound 3e

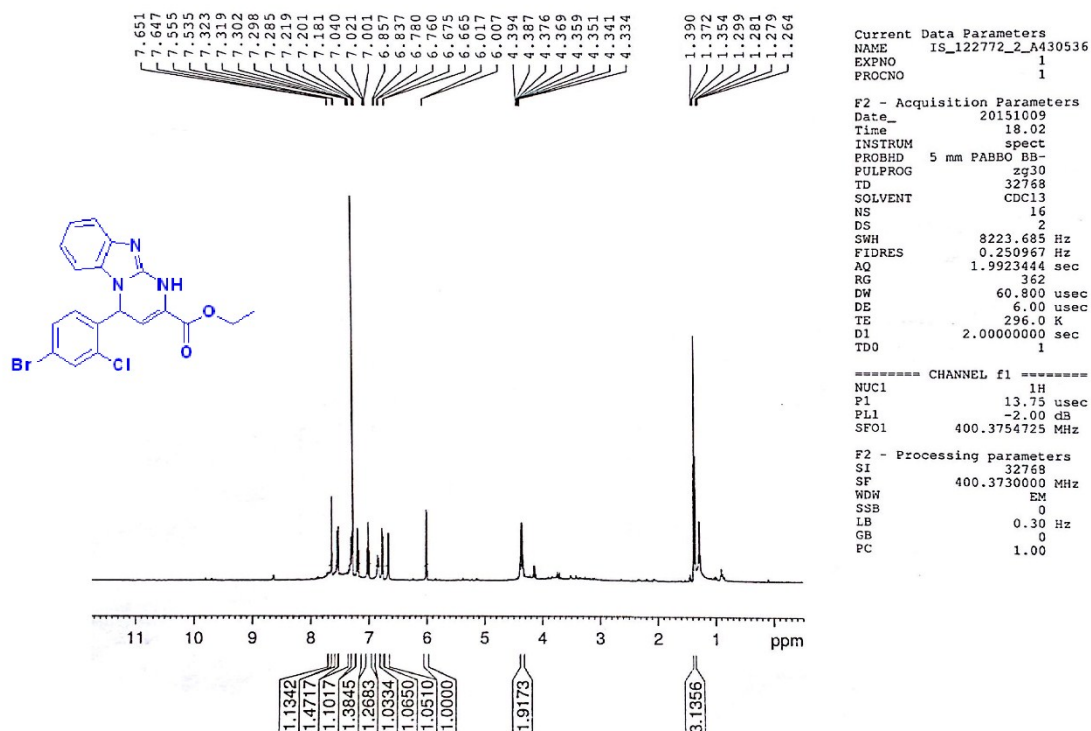

# <sup>13</sup>C NMR for compound 3e

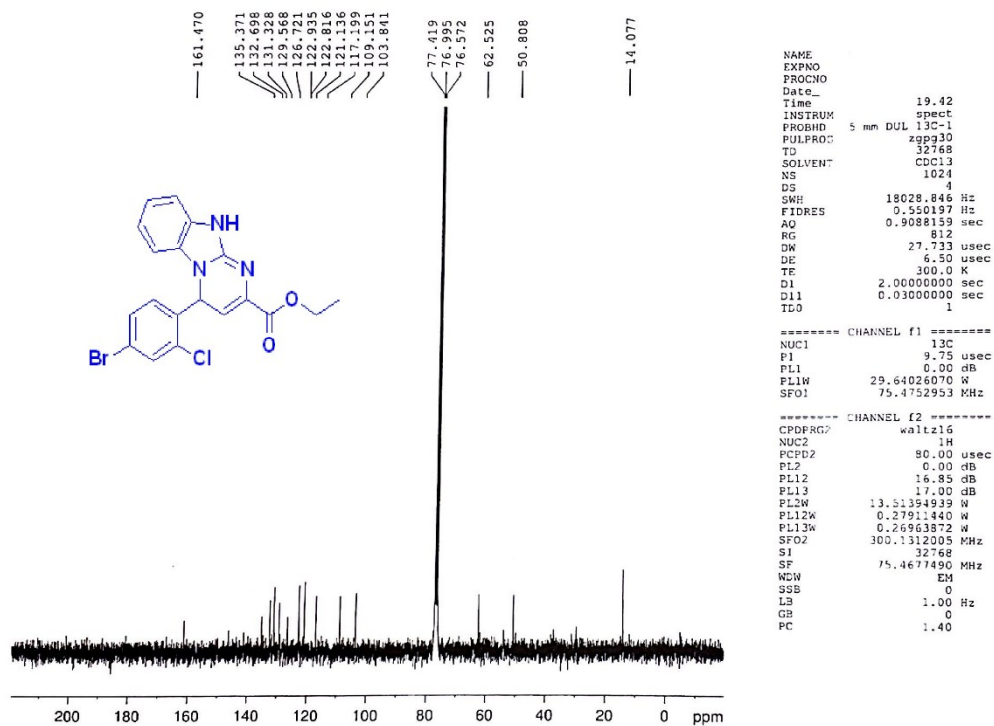

# <sup>1</sup>H NMR compound 3f

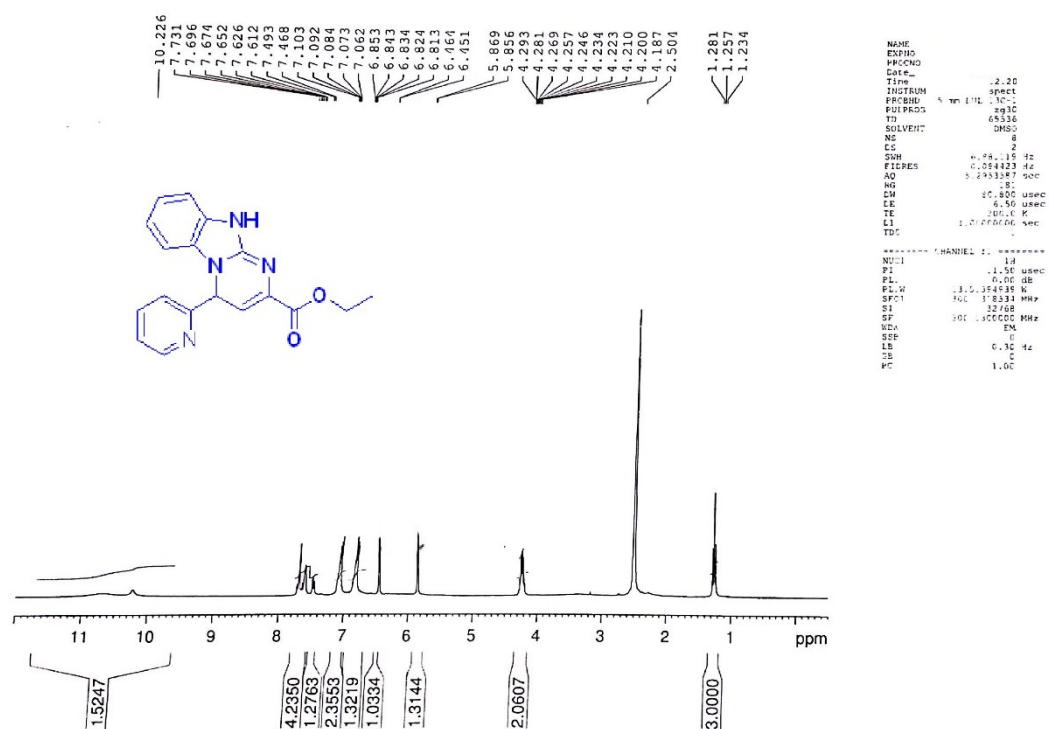

# <sup>13</sup>C NMR for compound 3f

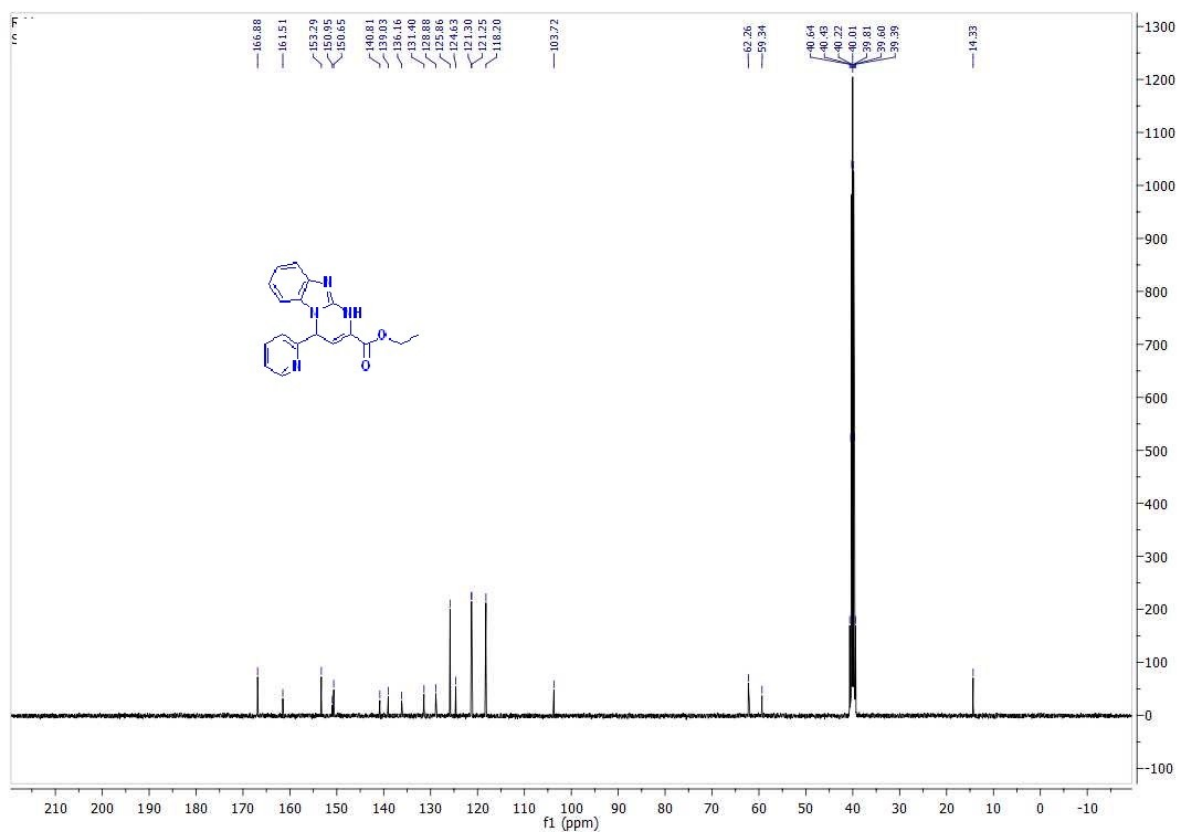

# <sup>1</sup>H NMR for compound 3g

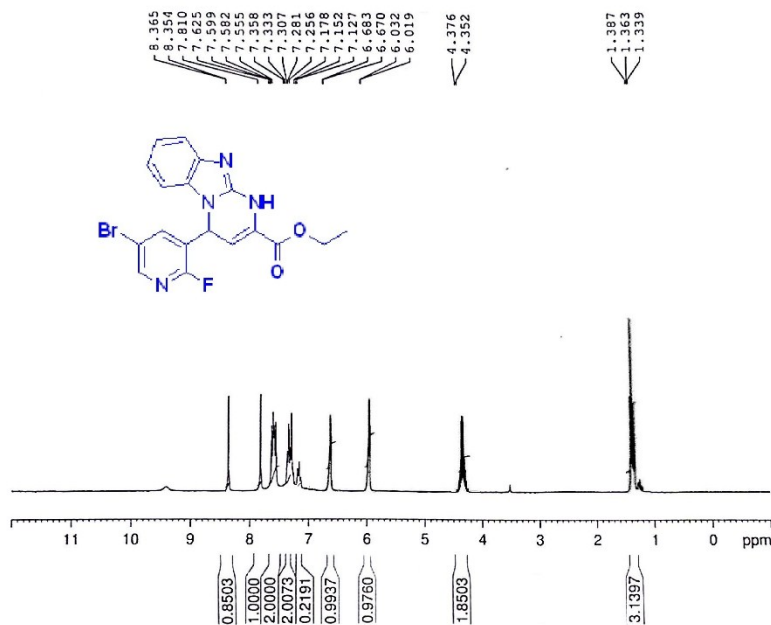

```

NAME
EXNO
PROCNO
Date_
Time
INSTRUM
PROBHD 5 mm DUL 13C-1
PULPROG zg30
TD 65536
SOLVENT CDCl3
NS 8
DS 2
SWH 6188.119 Hz
FIDRES 0.094423 Hz
AQ 5.2953587 sec
RG 181
DW 80.800 usec
DE 6.50 usec
TE 300.0 K
D1 1.00000000 sec
D11
TD0

----- CHANNEL f1 -----
NUC1 1H
P1 11.50 usec
PL1 0.00 dB
PL1W 13.51394939 W
SFO1 300.1318534 MHz
SI 32768
SF 300.1300000 MHz
WDW EM
SSB 0
LB 0.30 Hz
GB 0
PC 1.00

```

# <sup>13</sup>C NMR for compound 3g

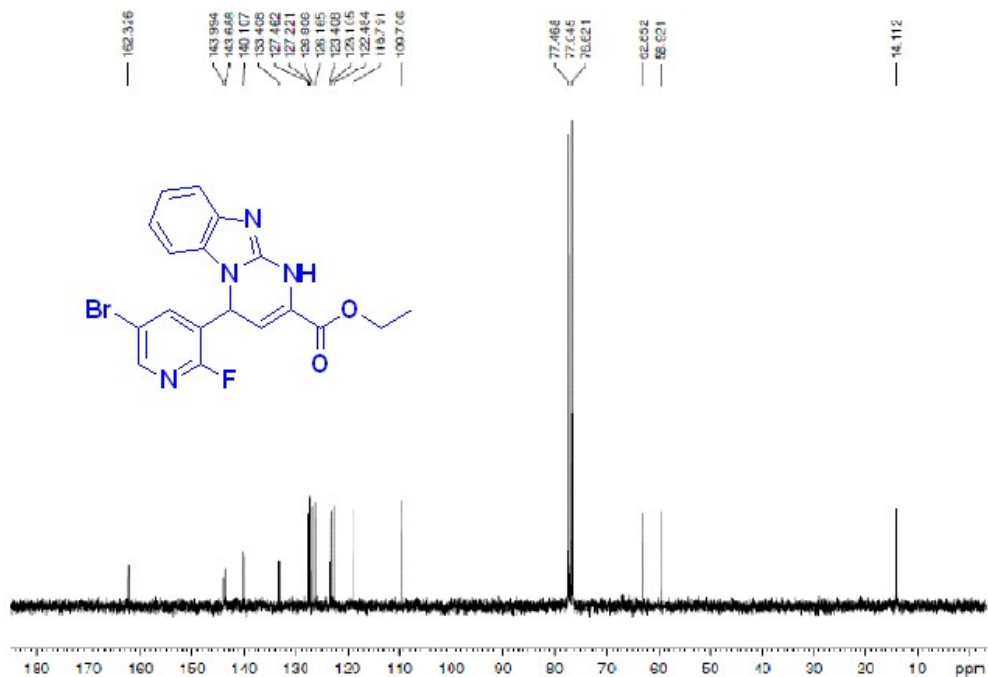

```

NAME
EXNO
PROCNO
Date_
Time
INSTRUM
PROBHD 5 mm DUL 13C-1
PULPROG zgpg30
TD 65536
SOLVENT CDCl3
NS 144
DS 4
SWH 17098.621 Hz
FIDRES 0.274439 Hz
AQ 1.8279508 sec
RG 1790.2
DW 27.800 usec
DE 6.50 usec
TE 299.4 K
D1 2.60000000 sec
D11 0.03000000 sec
TD0

----- CHANNEL f1 -----
NUC1 13C
P1 32.50 usec
PL1 2.00 dB
SFO1 75.4752953 MHz

----- CHANNEL f2 -----
CHPROG2 waitx16
NUC2 1H
PCPD2 100.00 usec
PL2 3.00 dB
PL12 22.74 dB
PL13 23.00 dB
SFO2 300.13512005 MHz
SI 32768
SF 75.4517493 MHz
WDW SSC
SSB 0
LB 1.00 Hz
GB 0
PC 1.40

```

$^1\text{H}$  NMR for compound 3h ( $\text{CDCl}_3$ , 400 MHz)

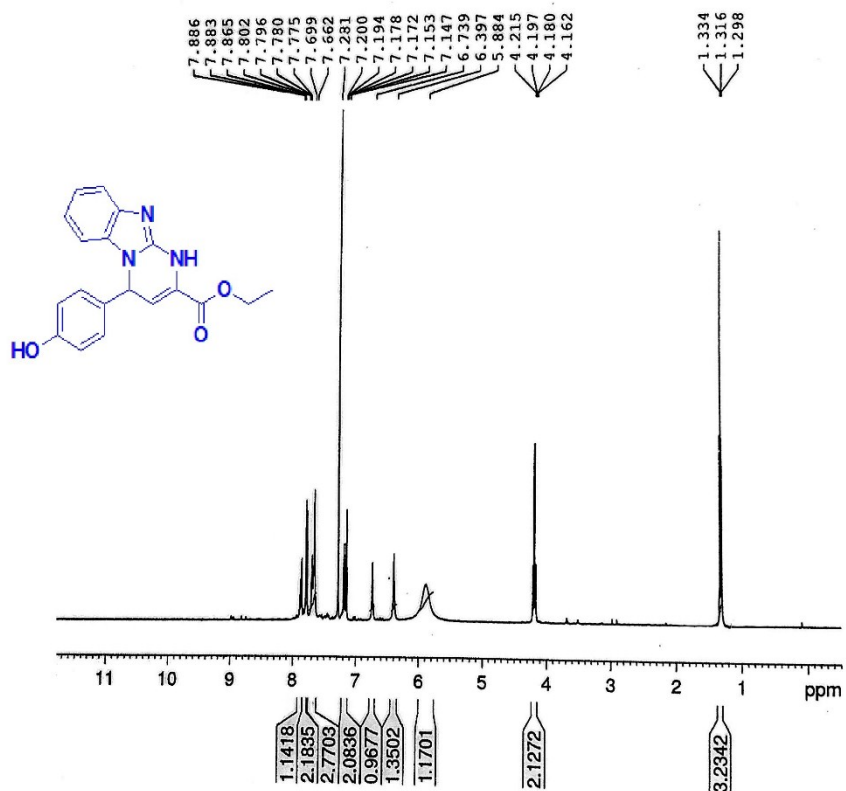

$^{13}\text{C}$  NMR for compound 3h

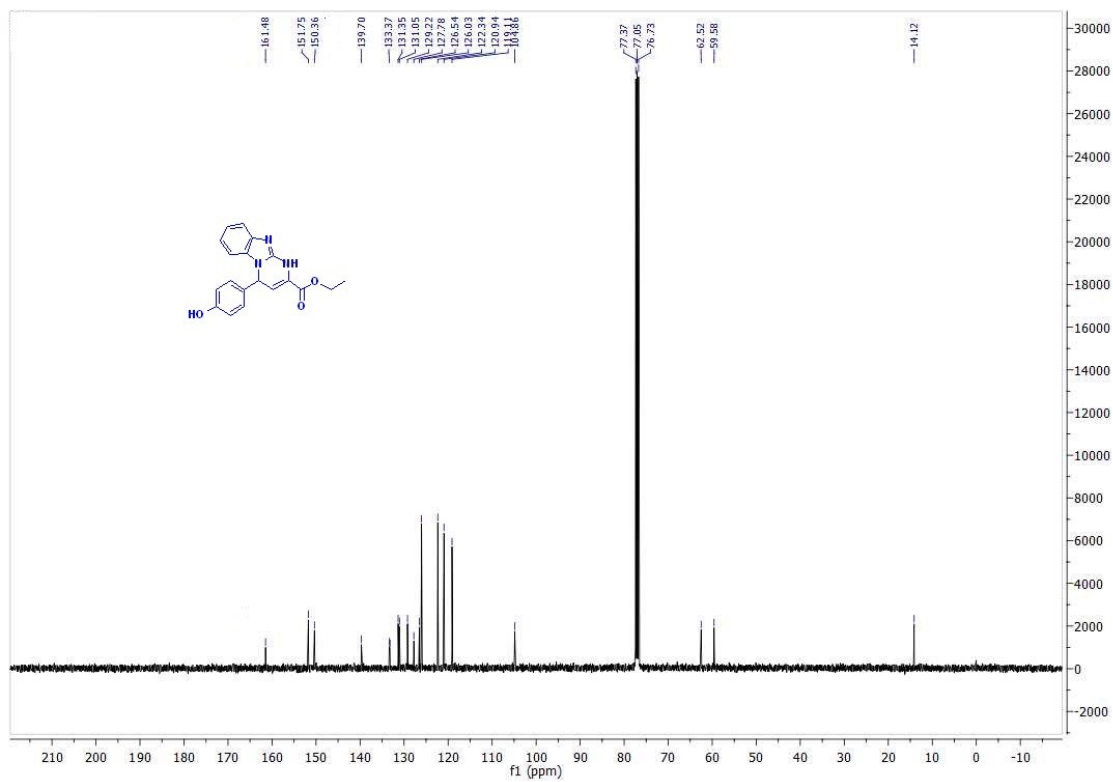

# <sup>1</sup>H NMR for compound 3i

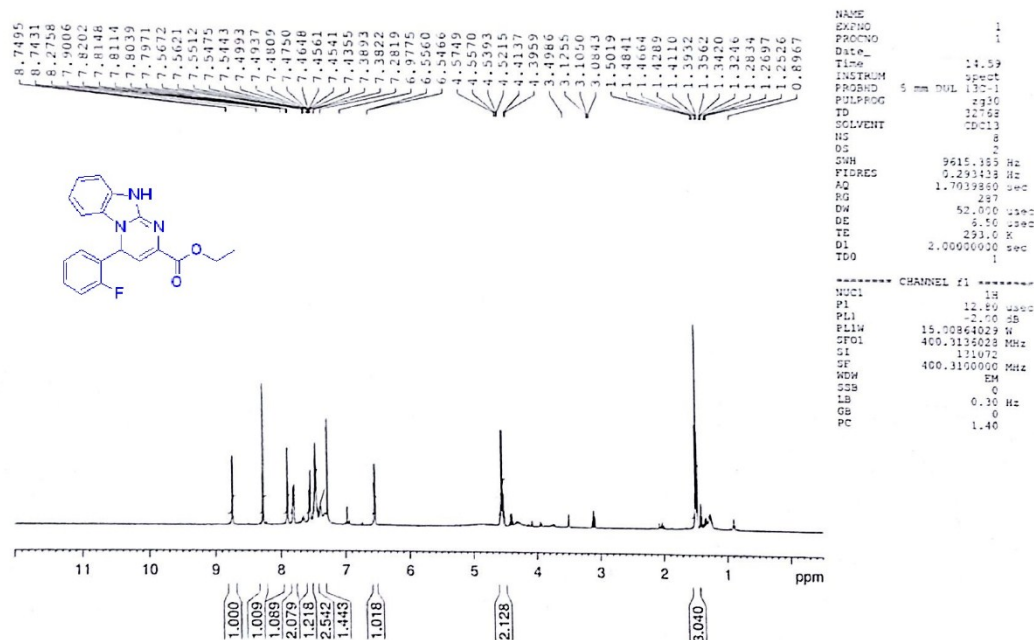

# <sup>13</sup>C NMR for compound 3i

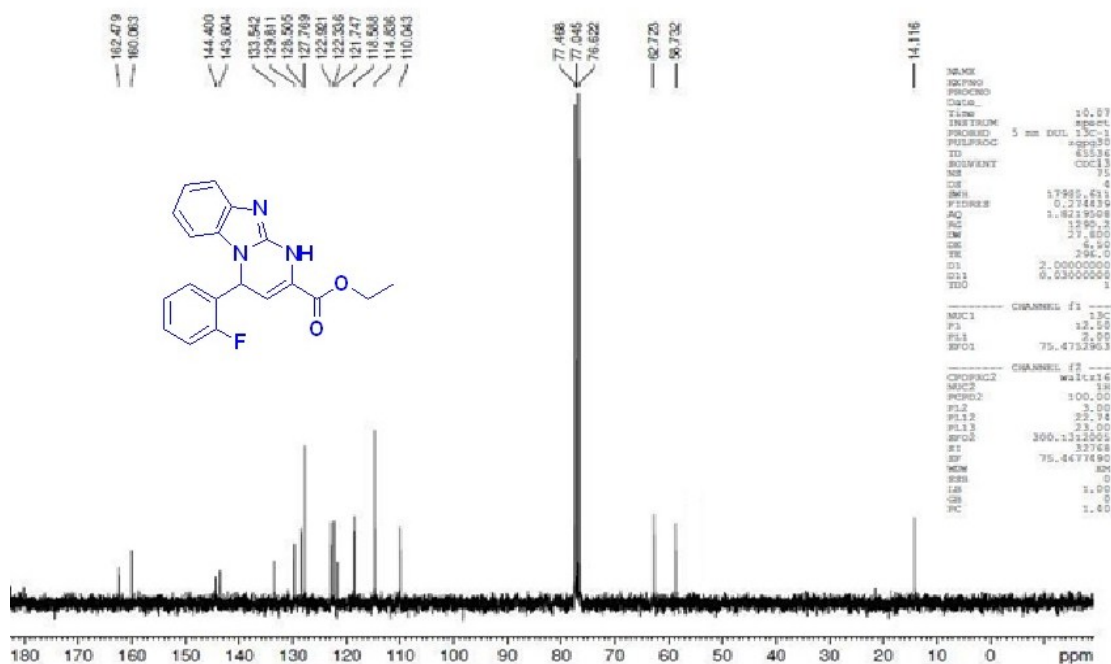

# <sup>1</sup>H NMR for compound 3j

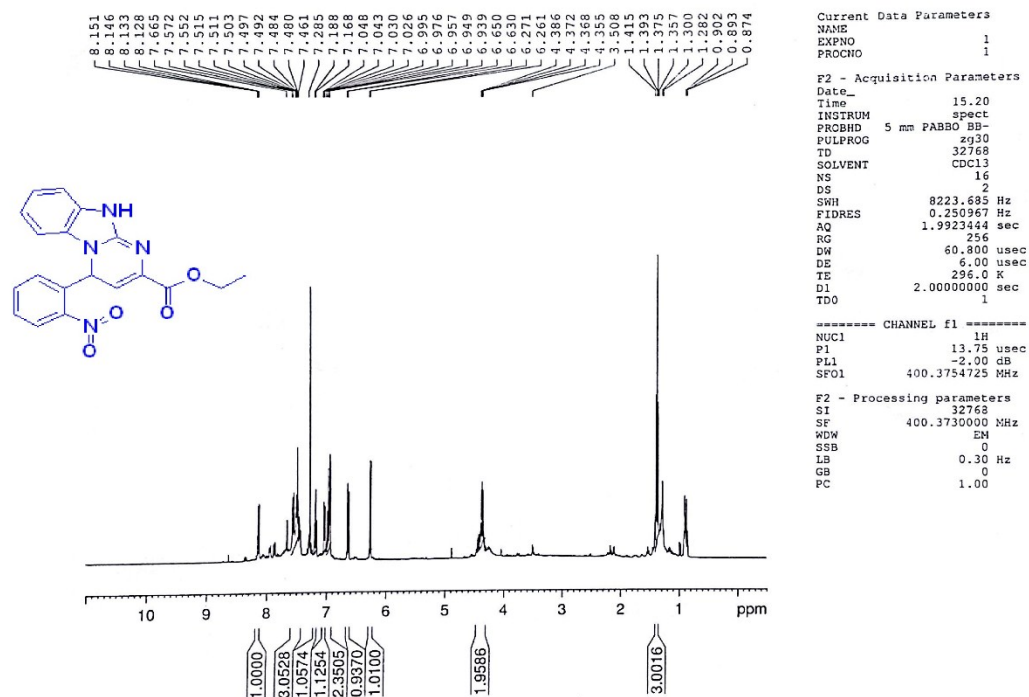

# <sup>13</sup>C NMR for compound 3j

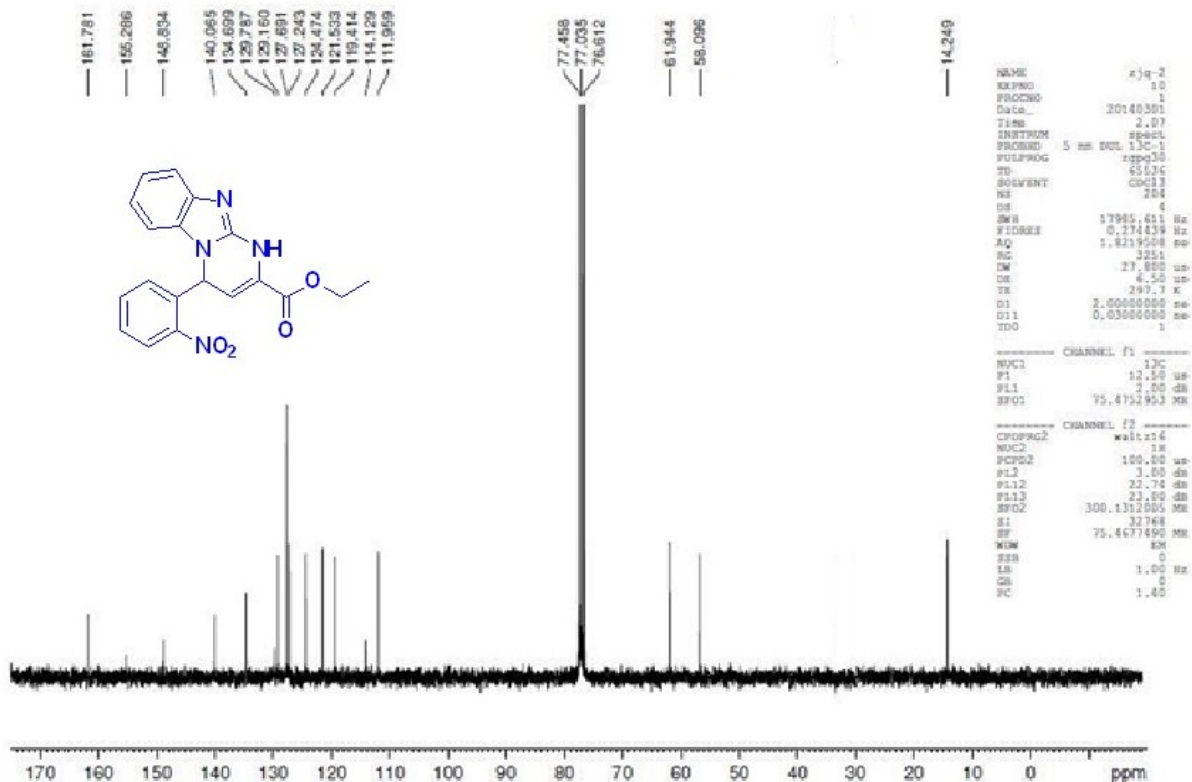

# <sup>1</sup>H NMR for compound 3k

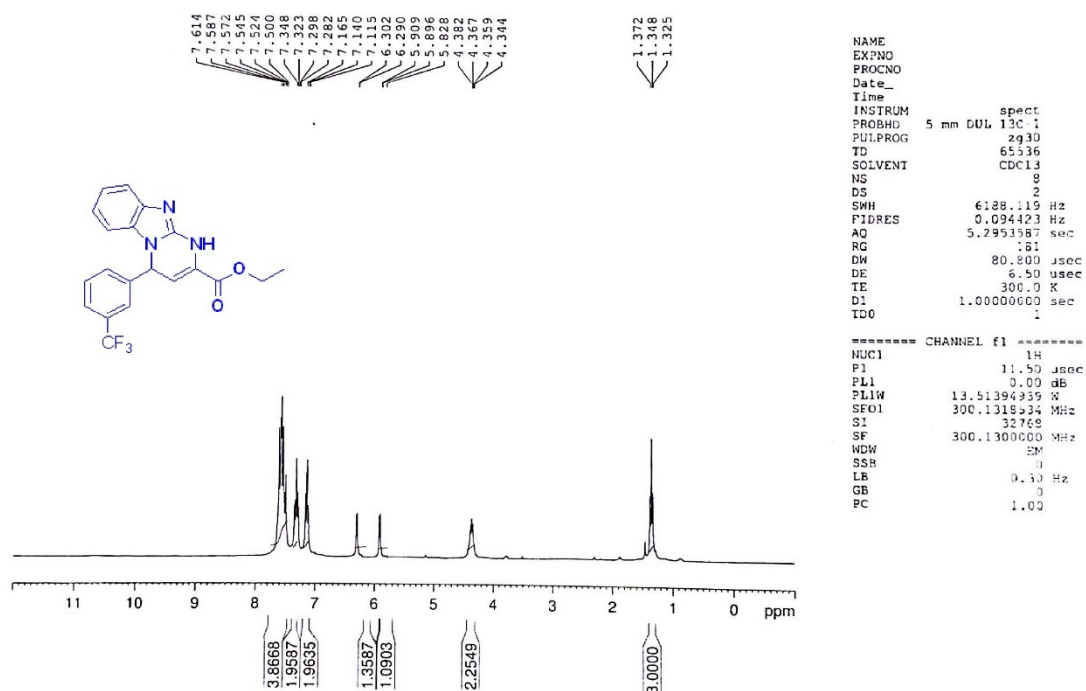

# <sup>13</sup>C NMR for compound 3k

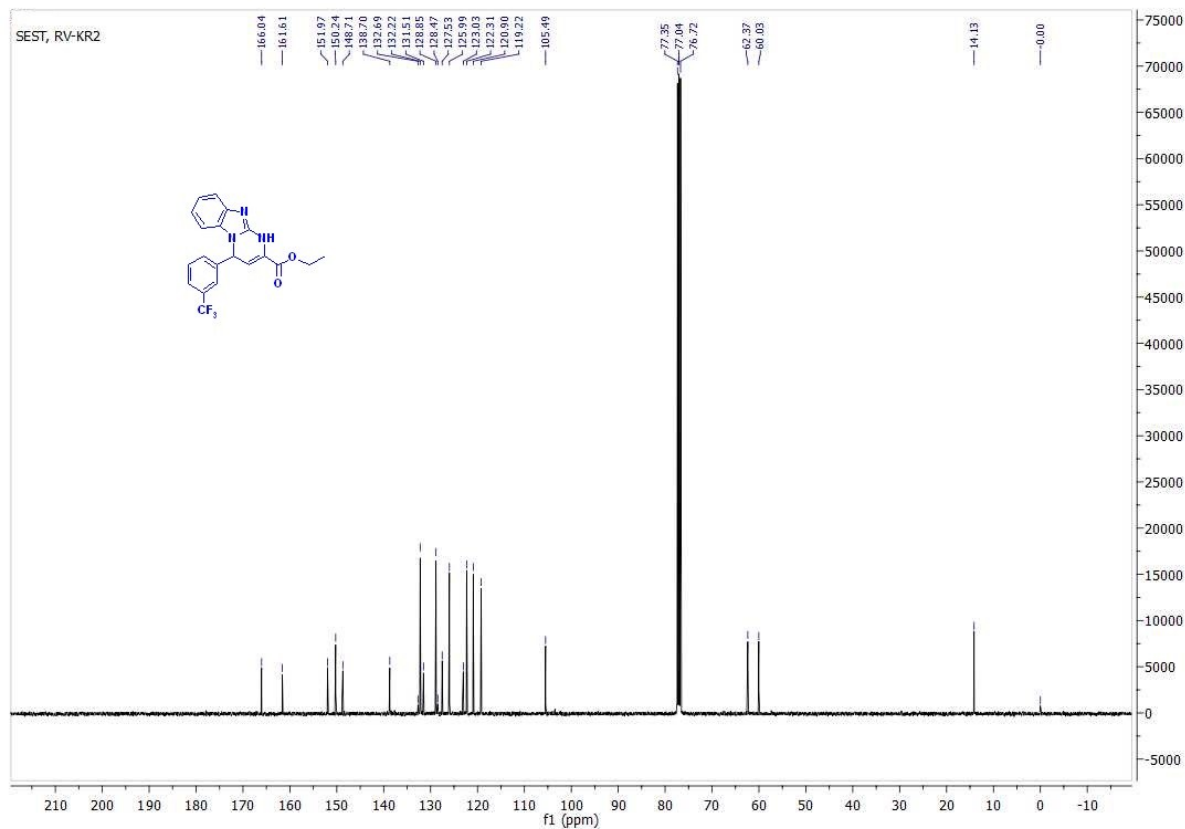

# <sup>1</sup>H NMR for compound 31

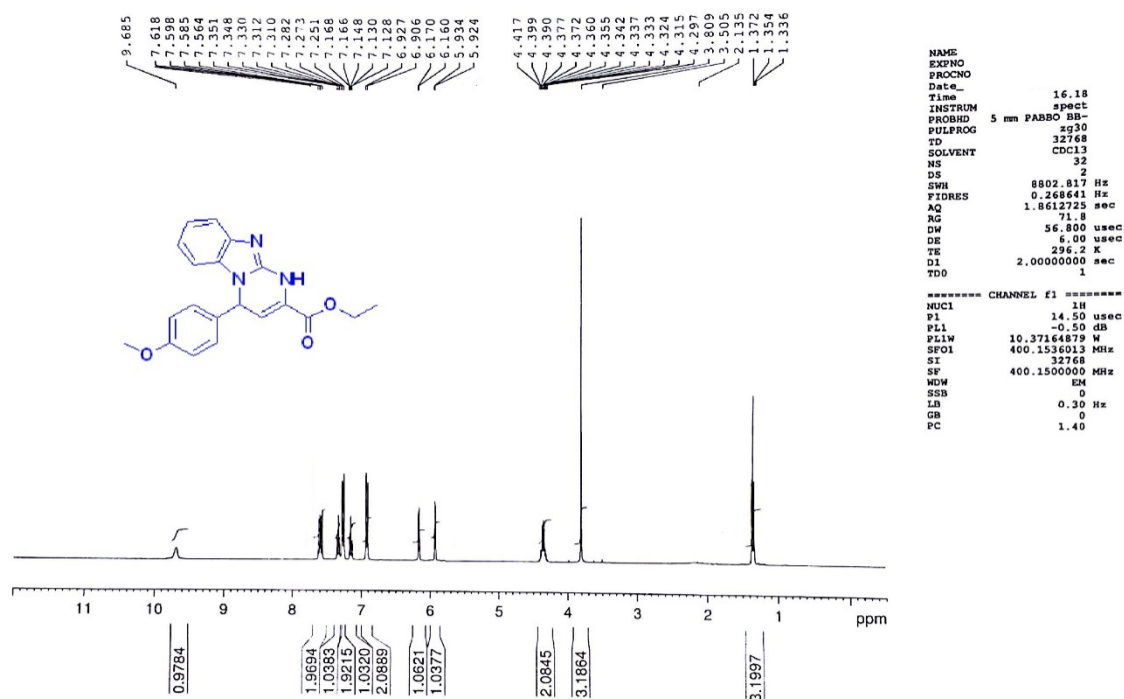

# <sup>13</sup>C NMR for compound 31

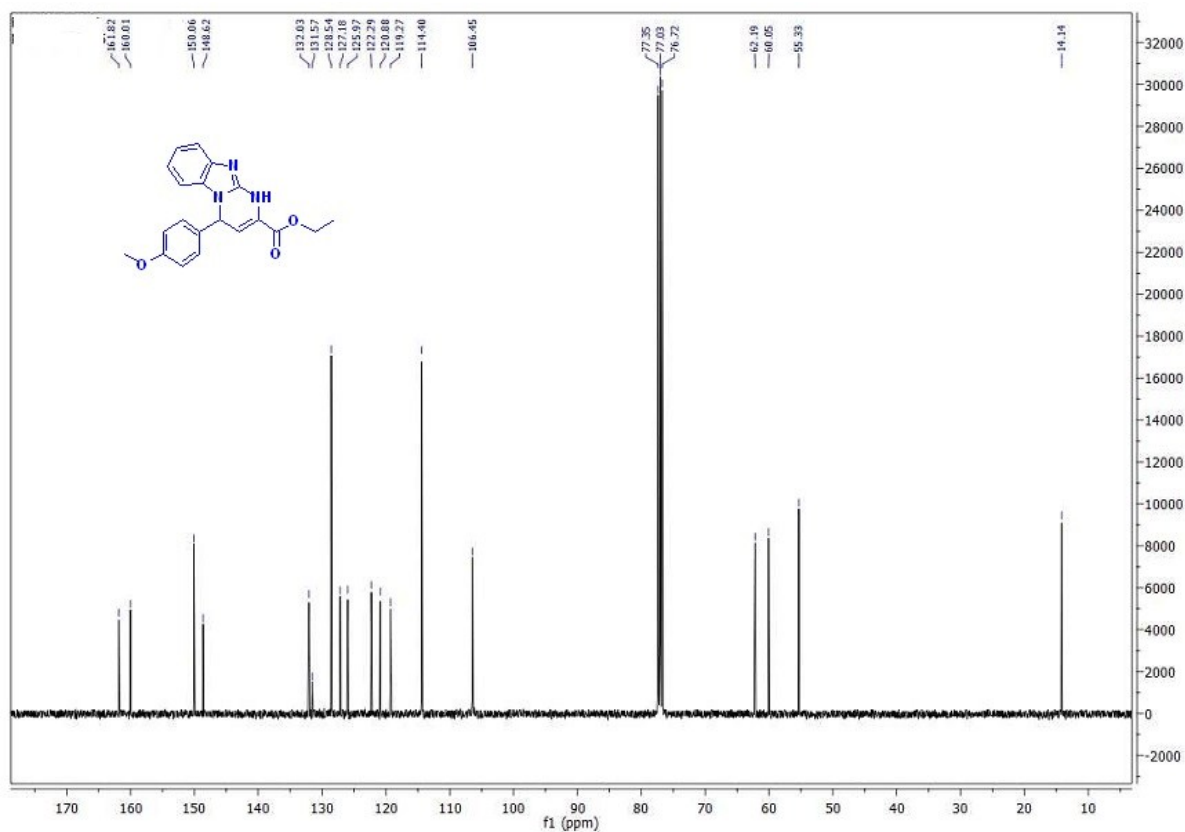

# <sup>1</sup>H NMR for compound 3m

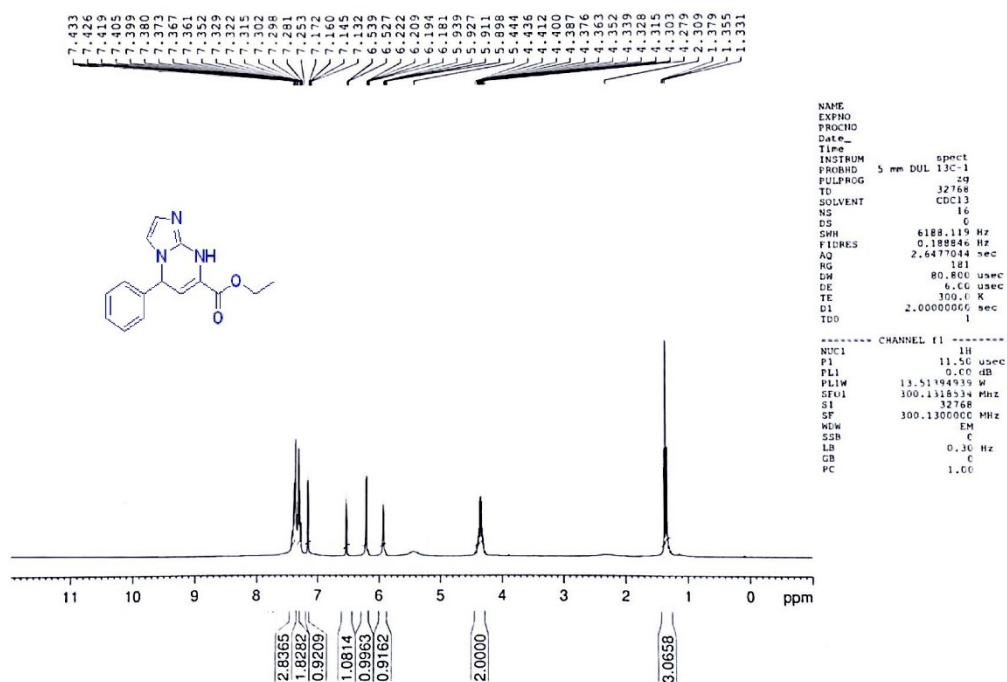

# <sup>13</sup>C NMR for compound 3m

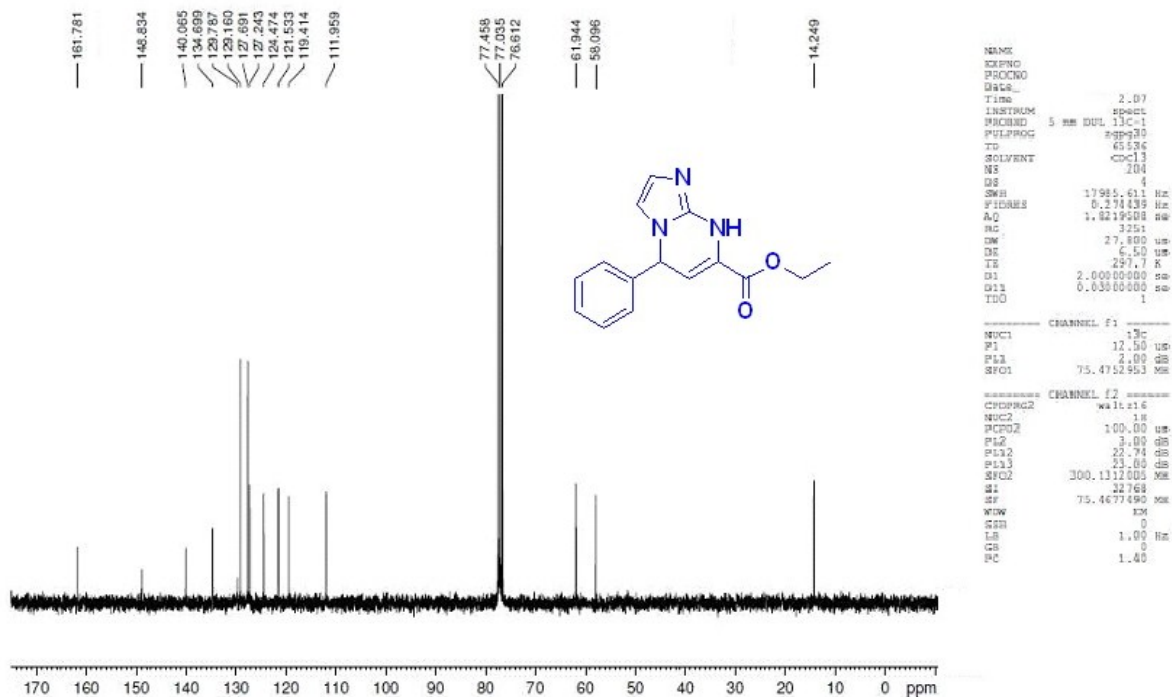

<sup>1</sup>H NMR for compound 3n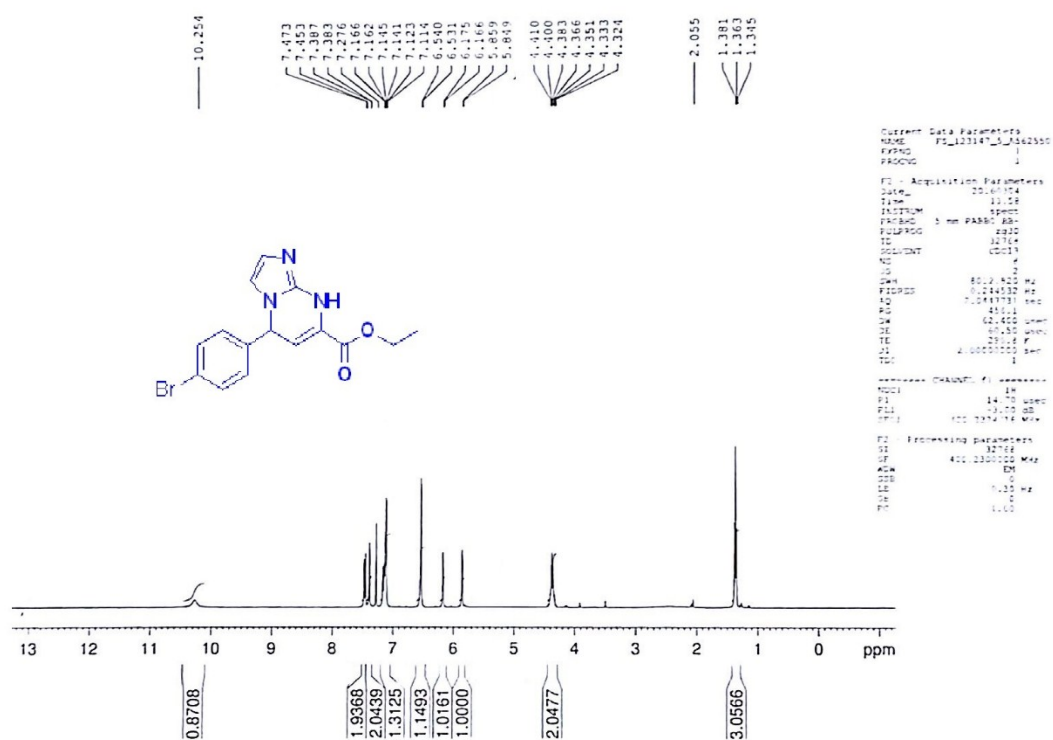 $^{13}\text{C}$  NMR for compound 3n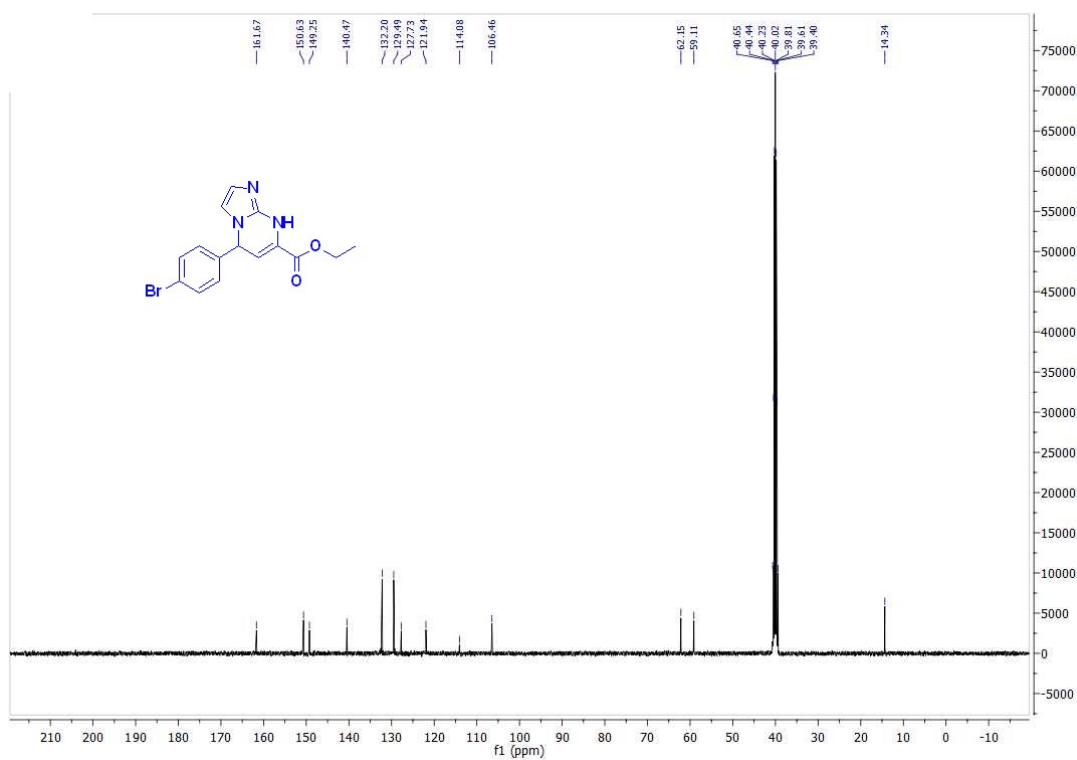

# <sup>1</sup>H NMR for compound 3o

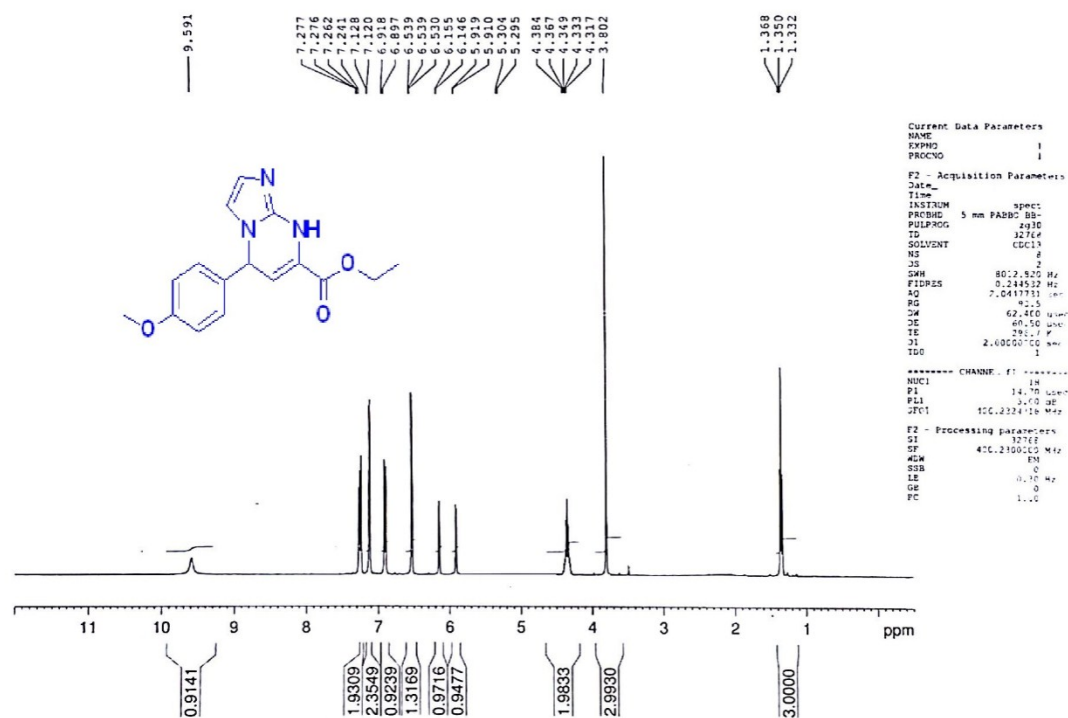

# <sup>13</sup>C NMR for compound 3o

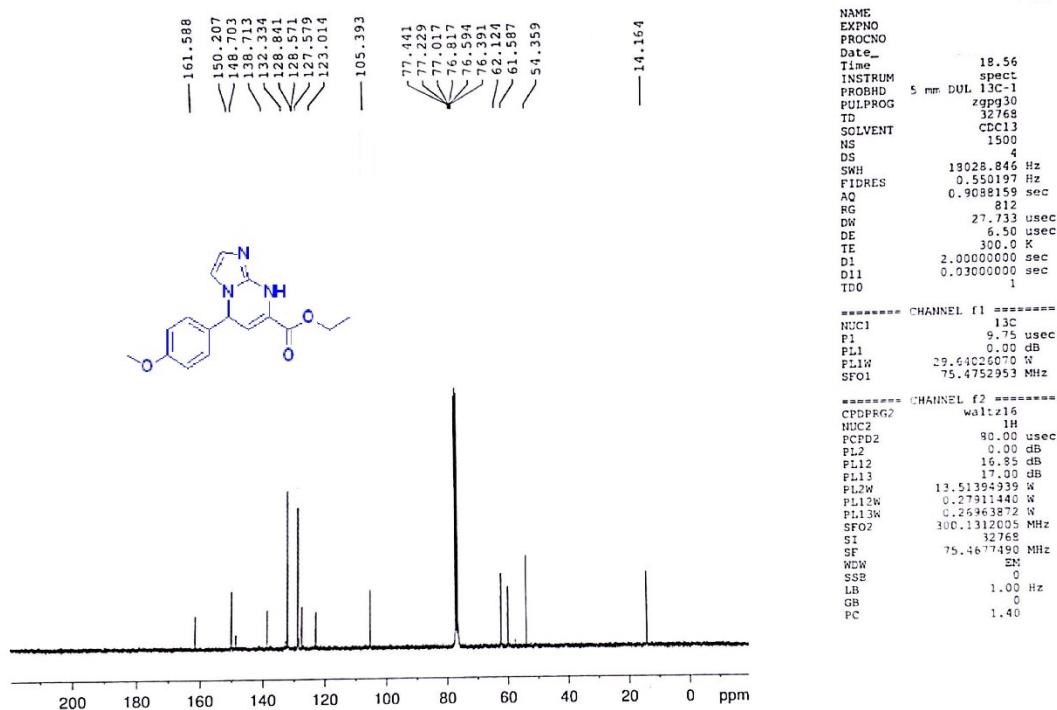

# <sup>1</sup>H NMR for compound 3p

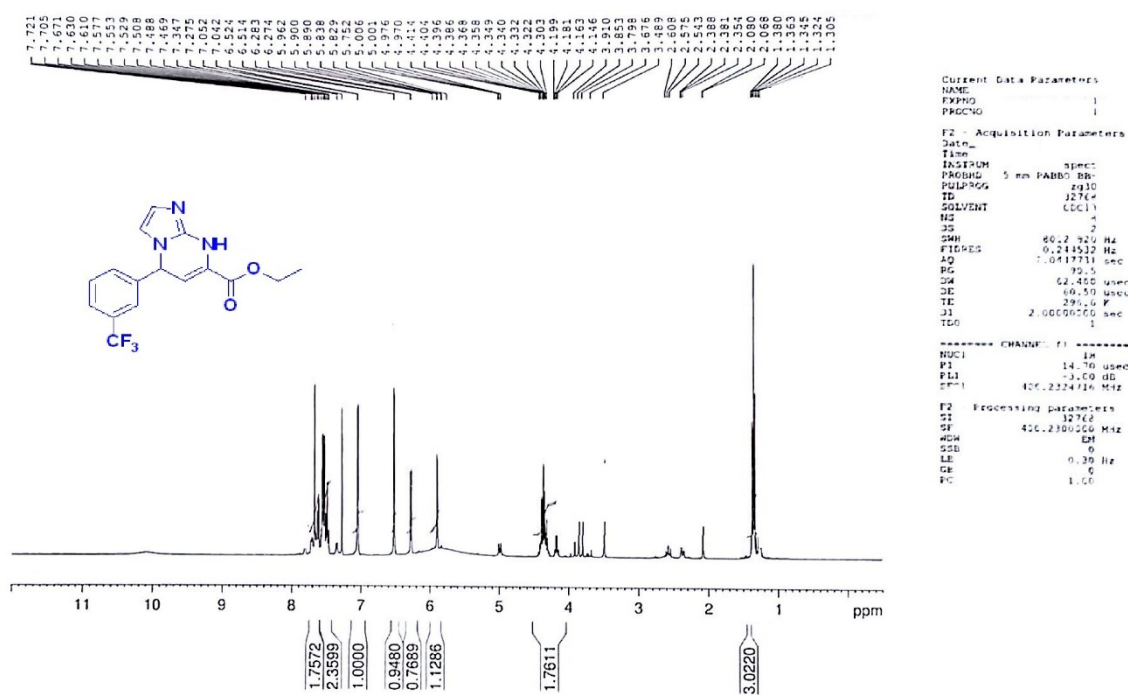

# <sup>13</sup>C NMR for compound 3p

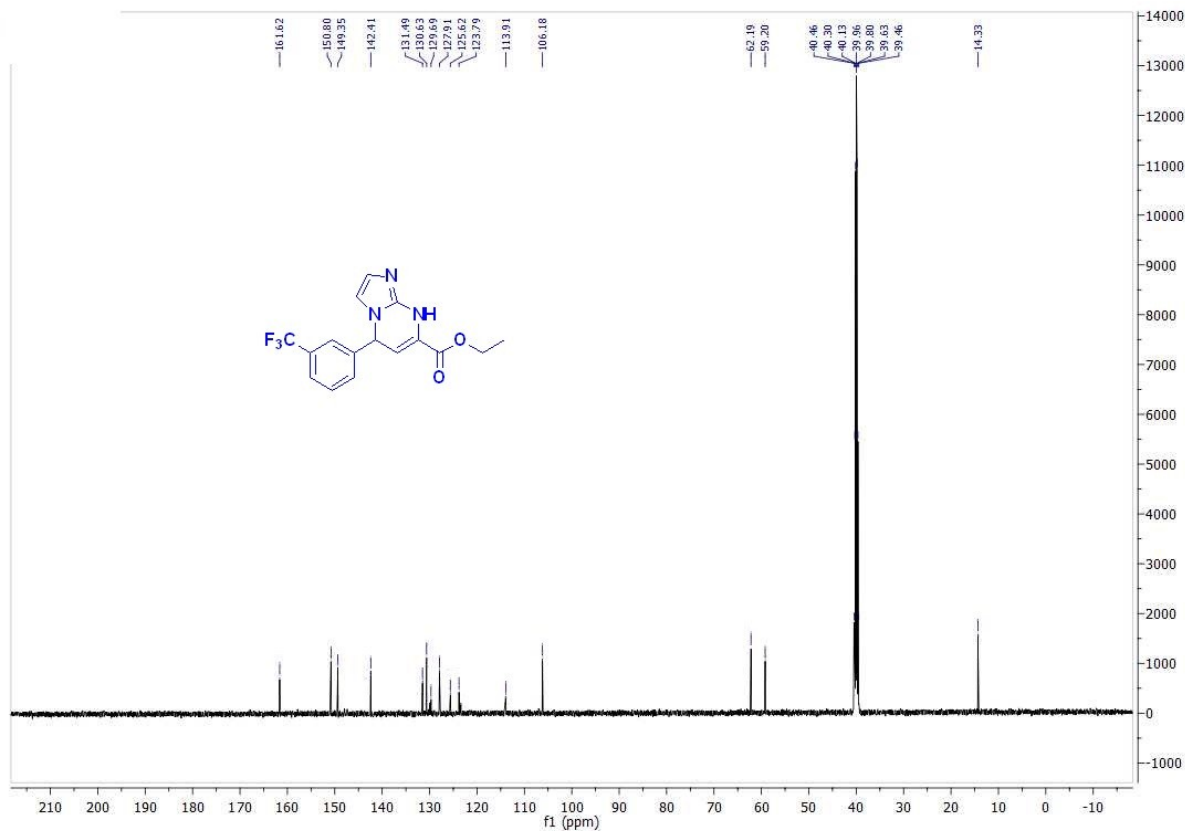

# <sup>1</sup>H NMR for compound 3q

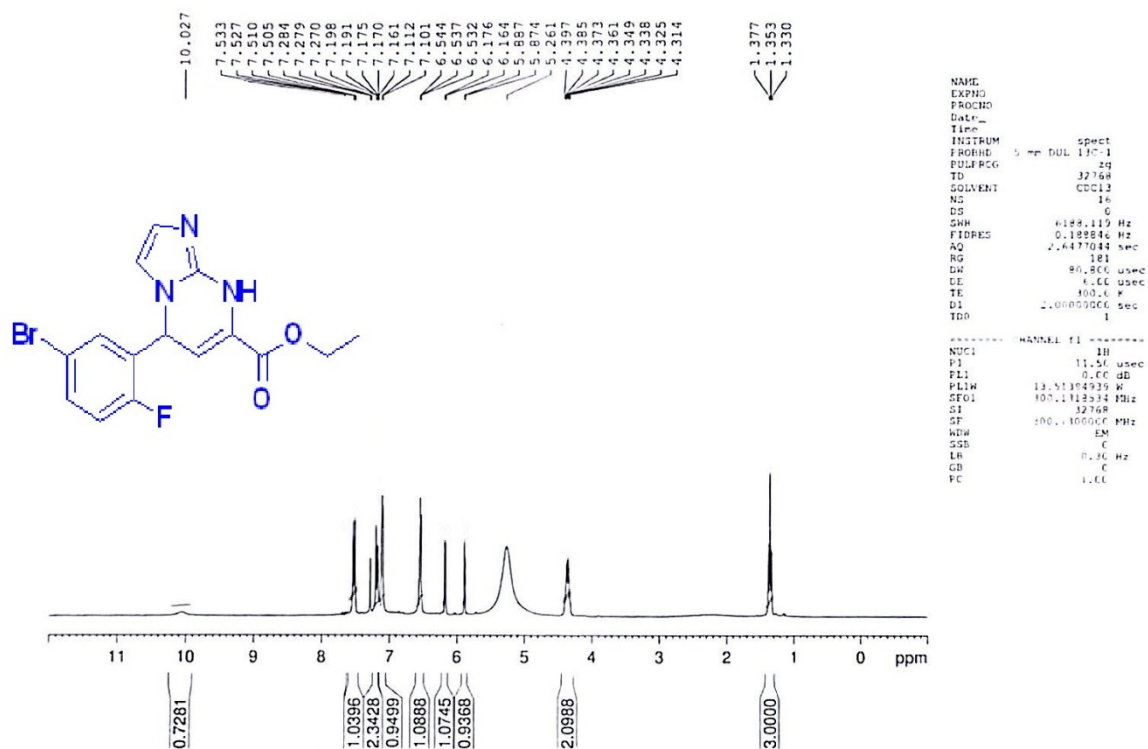

# <sup>13</sup>C NMR for compound 3q

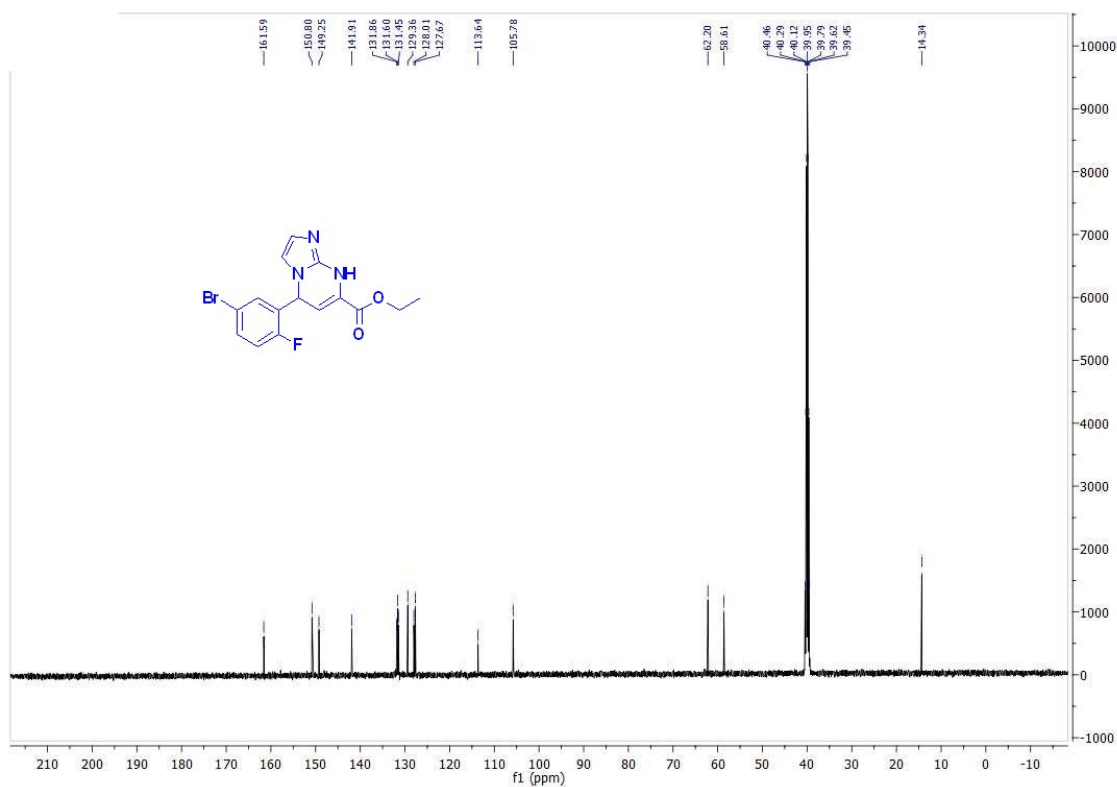

<sup>1</sup>H NMR for compound 3r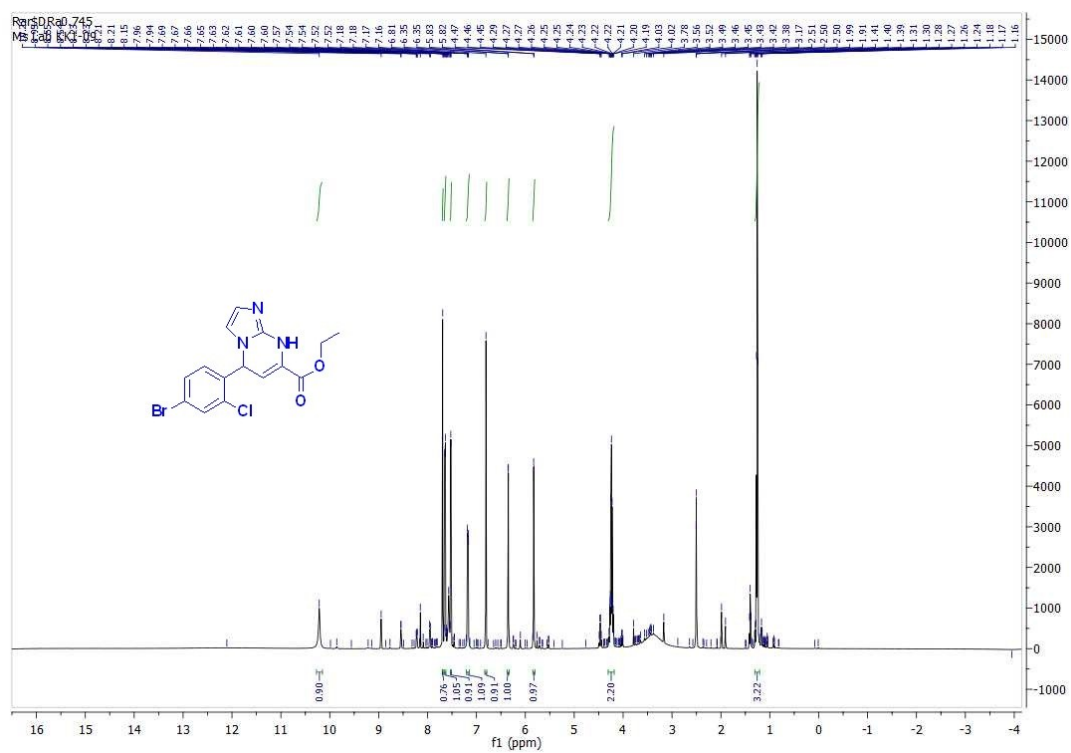 $^{13}\text{C}$  NMR for compound 3r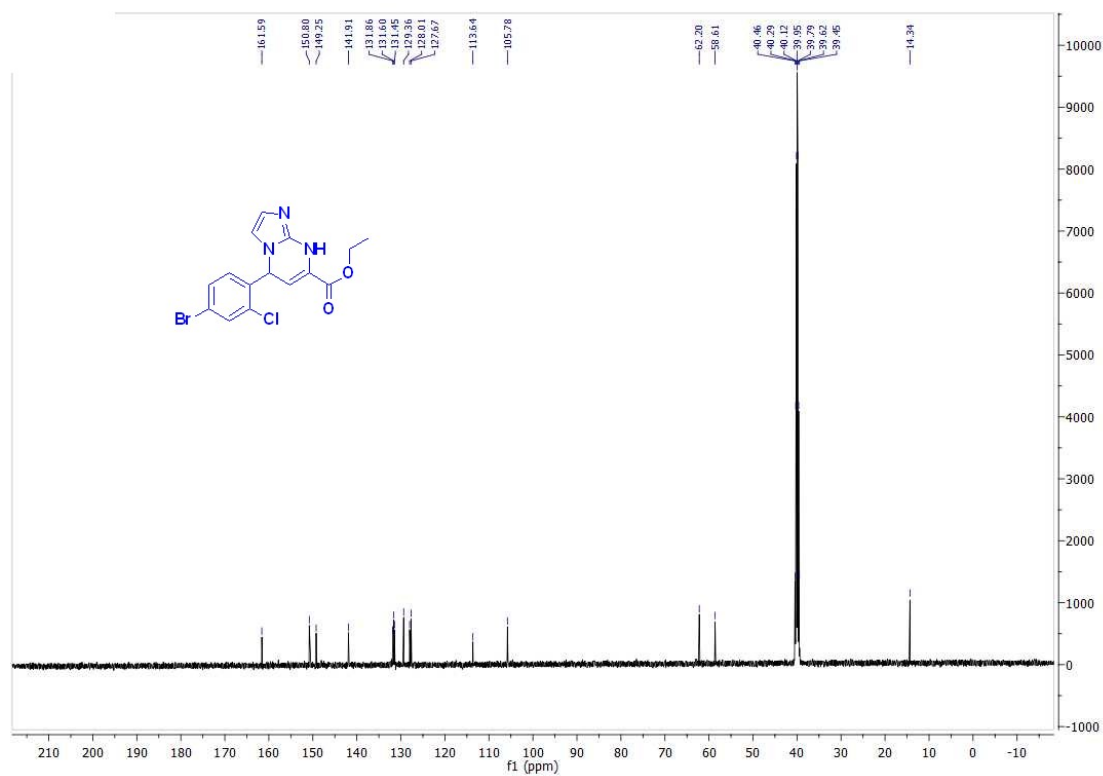

# <sup>1</sup>H NMR for compound 4a

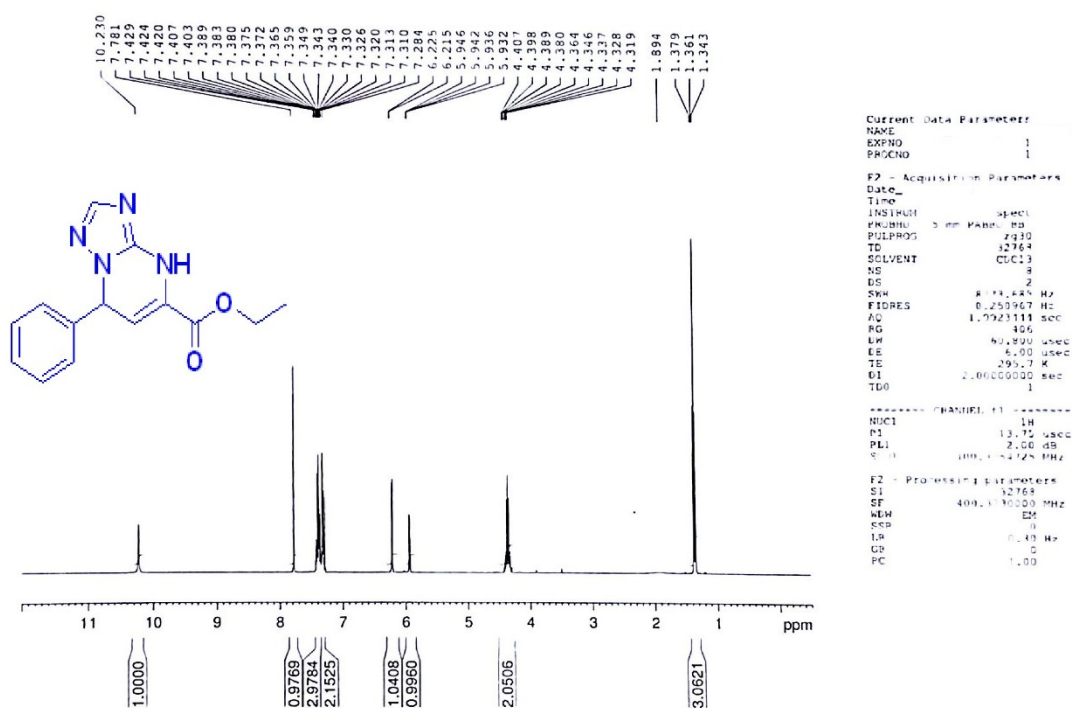

# <sup>13</sup>C NMR for compound 4a

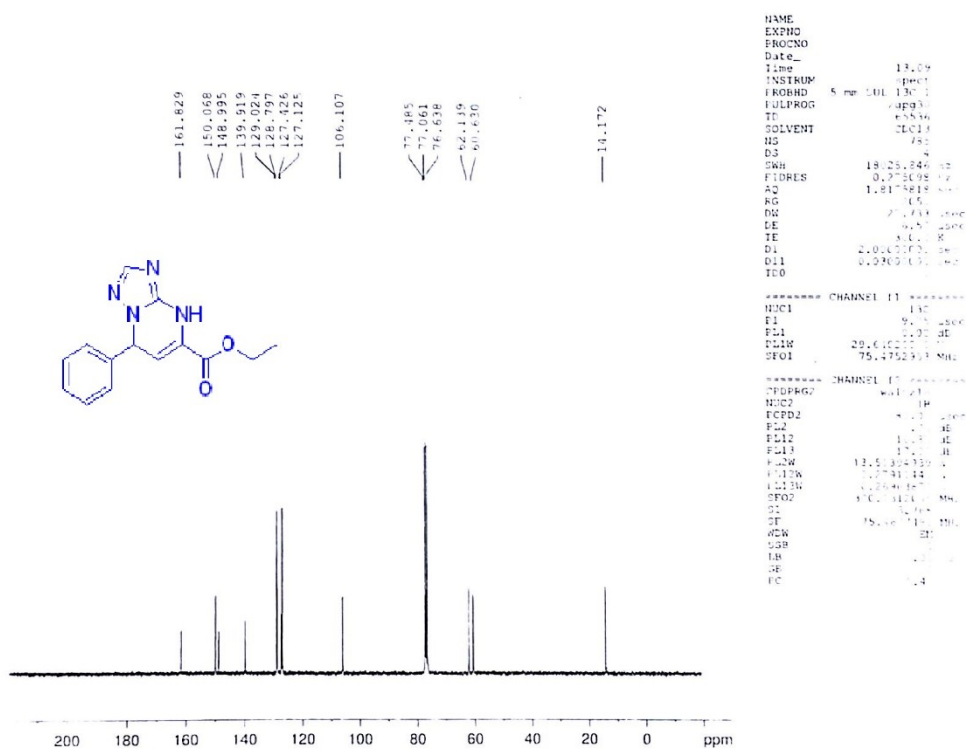

# <sup>1</sup>H NMR for compound 4b

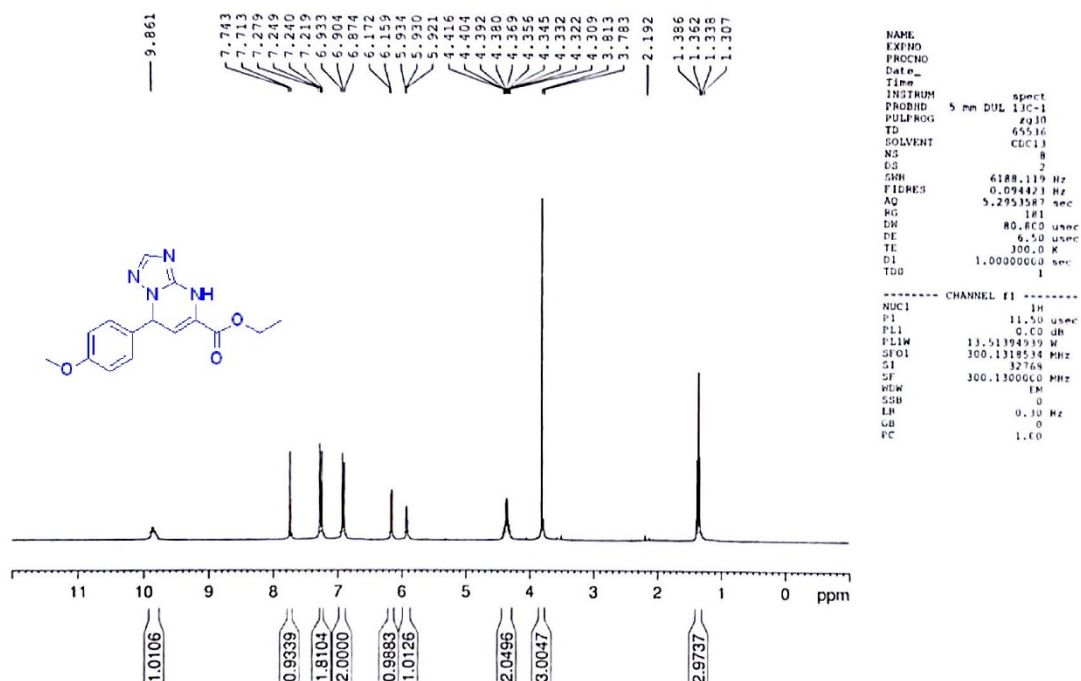

# <sup>13</sup>C NMR for compound 4b

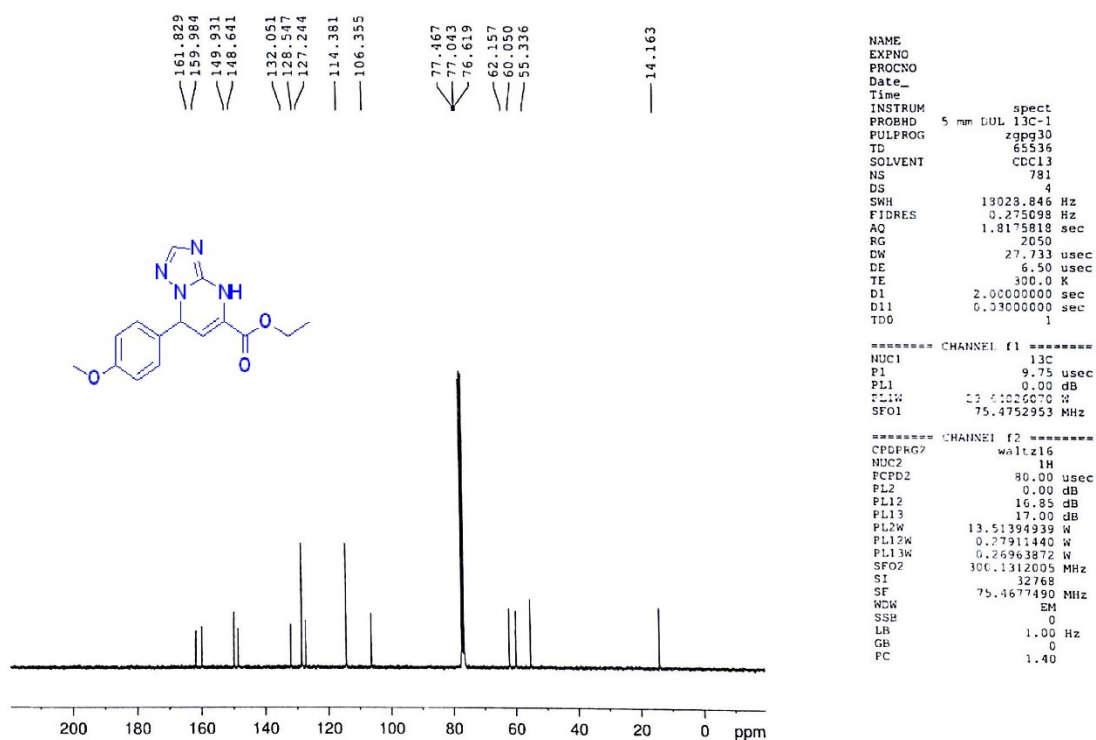

# <sup>1</sup>H NMR compound 4c

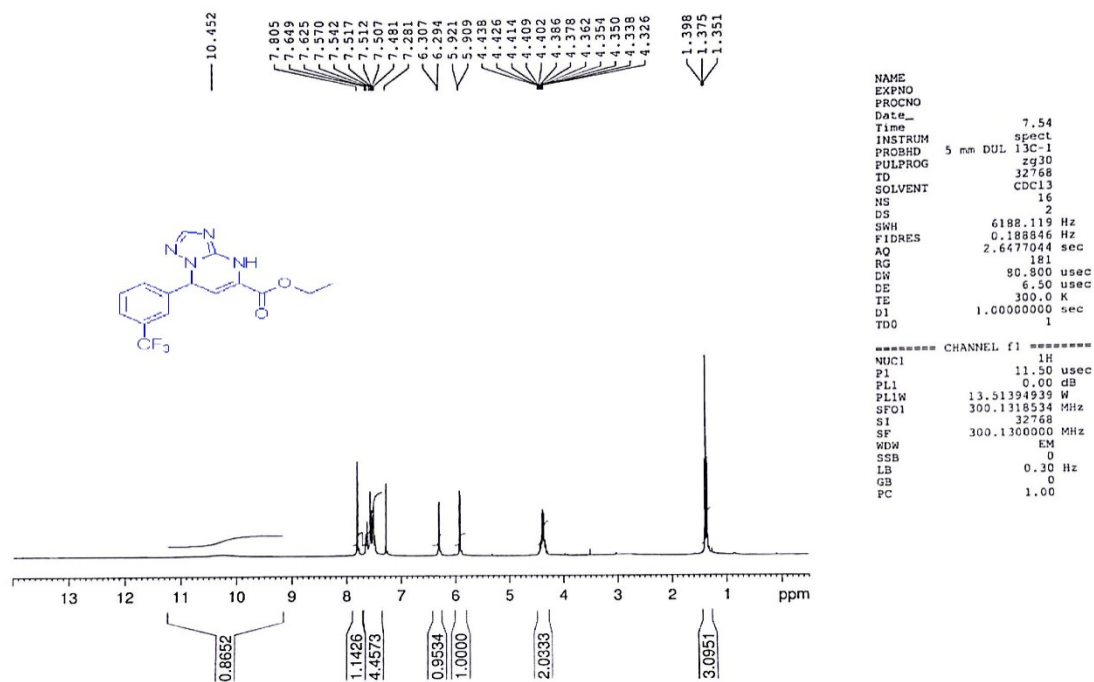

# <sup>13</sup>C NMR for compound 4c

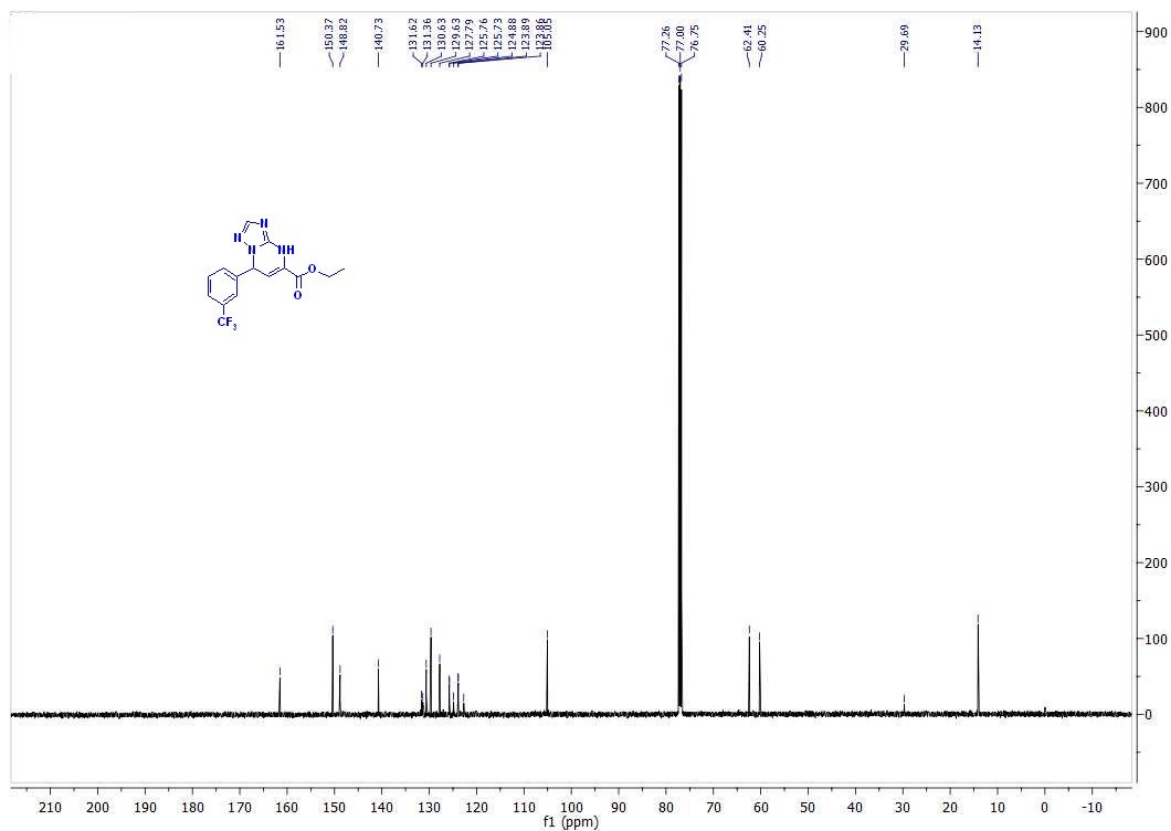

# <sup>1</sup>H NMR for compound 4d

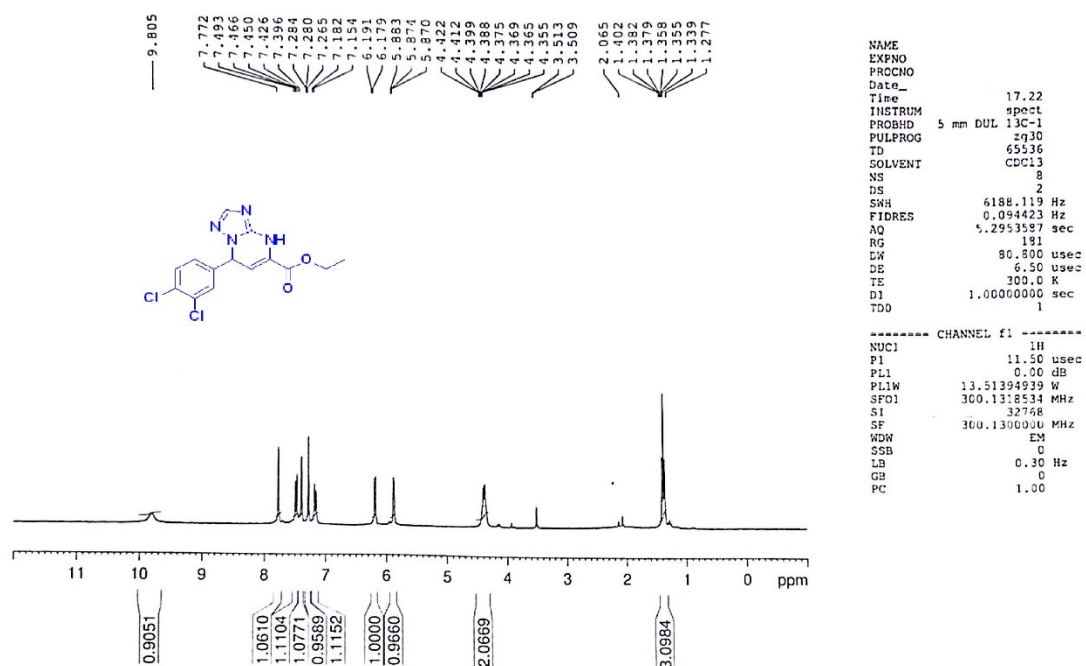

# <sup>13</sup>C NMR for compound 4d

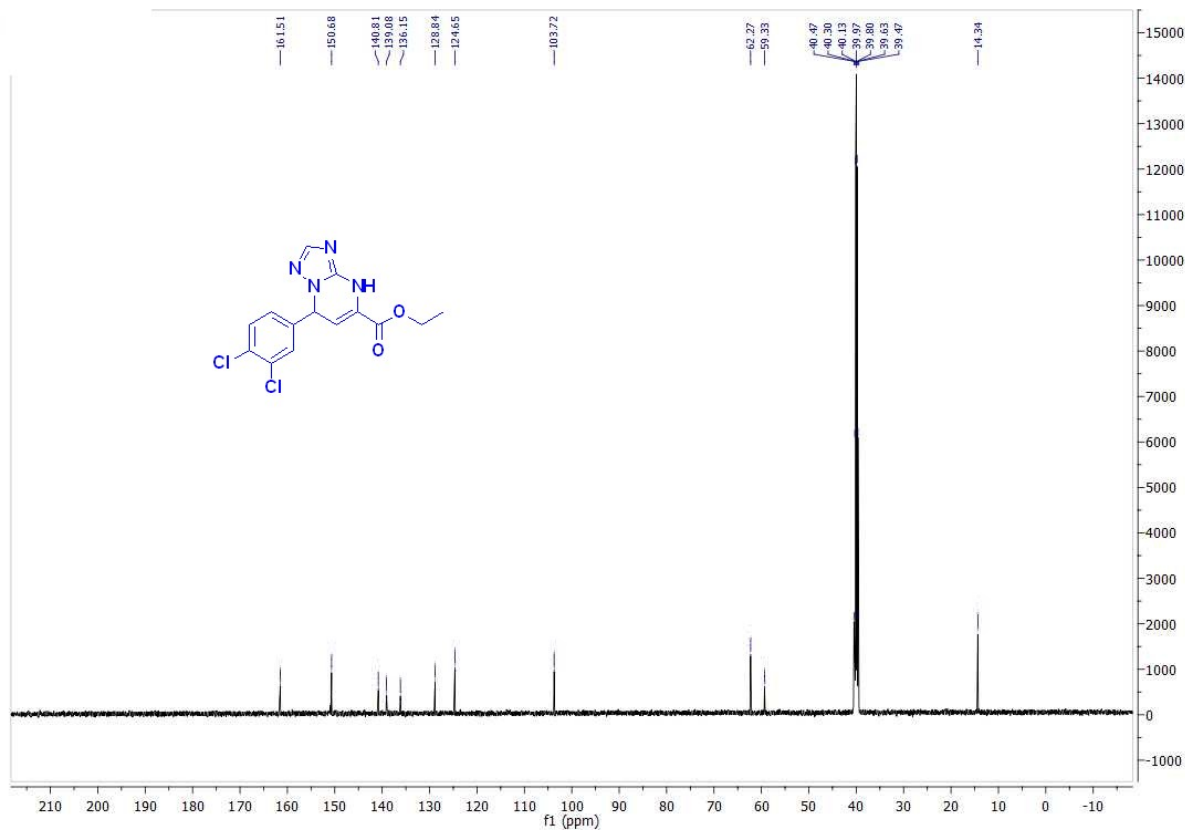

# <sup>1</sup>H NMR for compound 4e

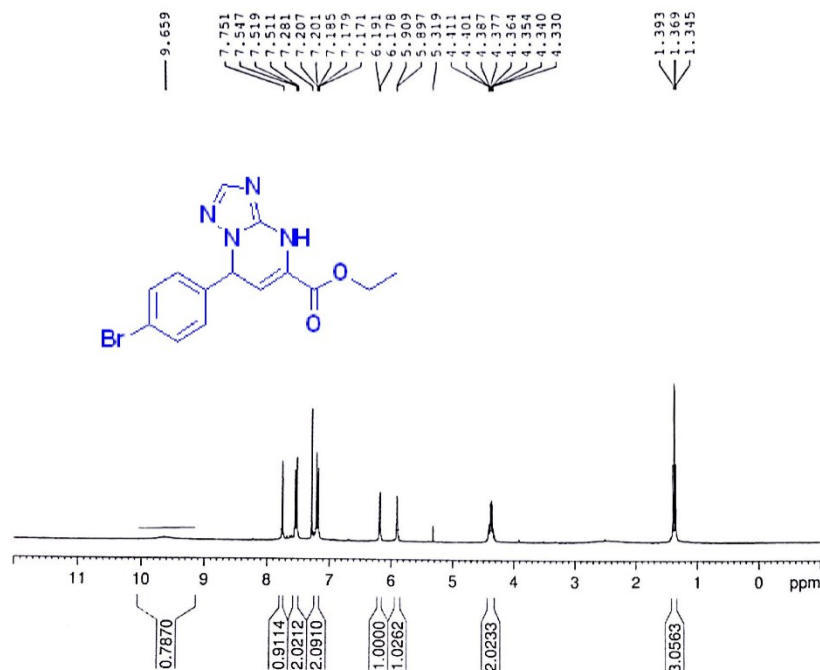

```

NAME
EXPNO
PROCNO
Date_
Time_
INSTRUM
PROBHD 5 mm DUL 13C-1
PULPROG zg30
TD 65536
SOLVENT CDCl3
NS 8
DS 2
SWH 6188.119 Hz
FIDRES 0.094423 Hz
AQ 5.2953587 sec
RG 181
DW 80.800 usec
DE 6.50 usec
TE 300.0 K
D1 1.00000000 sec
TD0 1

```

```

----- CHANNEL f1 -----
NUC1 1H
P1 11.50 usec
PL1 0.00 dB
PL1W 13.5139433 W
SFO1 300.1318534 MHz
SI 32768
SF 300.1300000 MHz
WDW EM
SSB 0
LB 0.30 Hz
GB 0
PC 1.00

```

# <sup>13</sup>C NMR for compound 4e

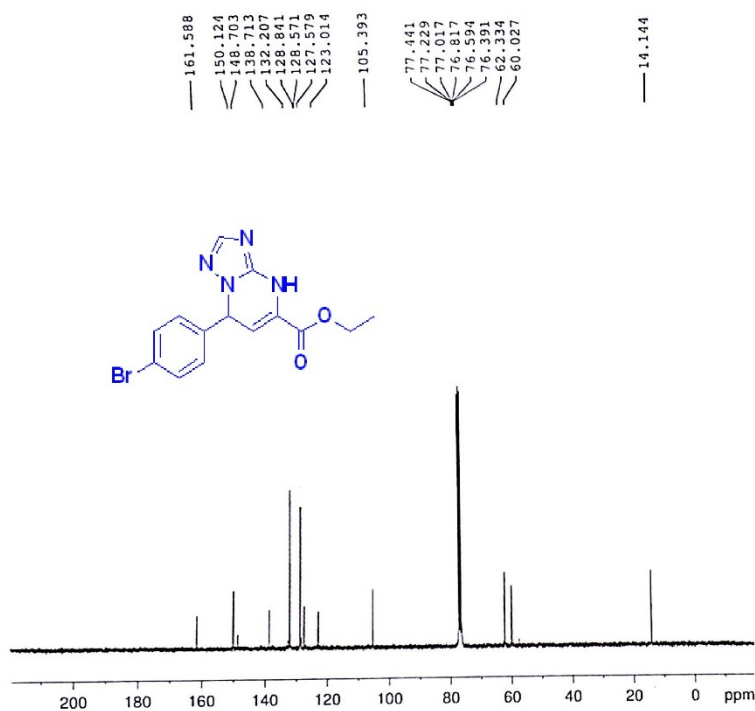

```

NAME
EXPNO
PROCNO
Date_
Time_
INSTRUM
PROBHD 5 mm DUL 13C-1
PULPROG zgpg30
TD 32768
SOLVENT CDCl3
NS 1500
DS 4
SWH 13028.846 Hz
FIDRES 0.550197 Hz
AQ 0.9088159 sec
RG 812
DW 27.733 usec
DE 6.50 usec
TE 300.0 K
D1 2.00000000 sec
D11 0.03000000 sec
TD0 1

```

```

----- CHANNEL f1 -----
NUC1 13C
P1 9.75 usec
PL1 0.00 dB
PL1W 29.64026070 W
SFO1 75.4752953 MHz

----- CHANNEL f2 -----
CPDPRG2 waltz16
NUC2 1H
PCPD2 80.00 usec
PL2 0.00 dB
PL12 16.85 dB
PL13 17.00 dB
PL2W 13.5139433 W
PL12W 0.27911440 W
PL13W 0.24463872 W
SFO2 300.1312005 MHz
SI 32768
SF 75.4677490 MHz
WDW EM
SSB 0
LB 1.00 Hz
GB 0
PC 1.40

```

# <sup>1</sup>H NMR for compound 4f

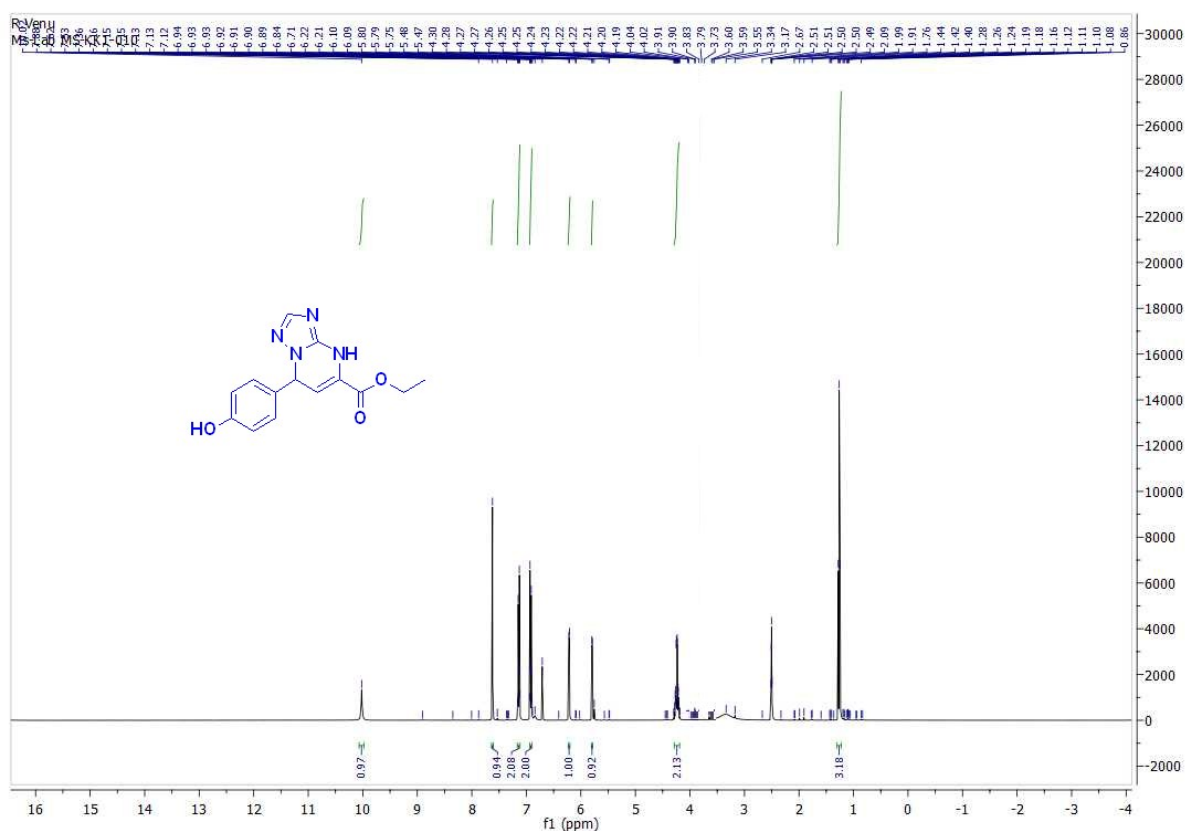

# <sup>13</sup>C NMR for compound 4f

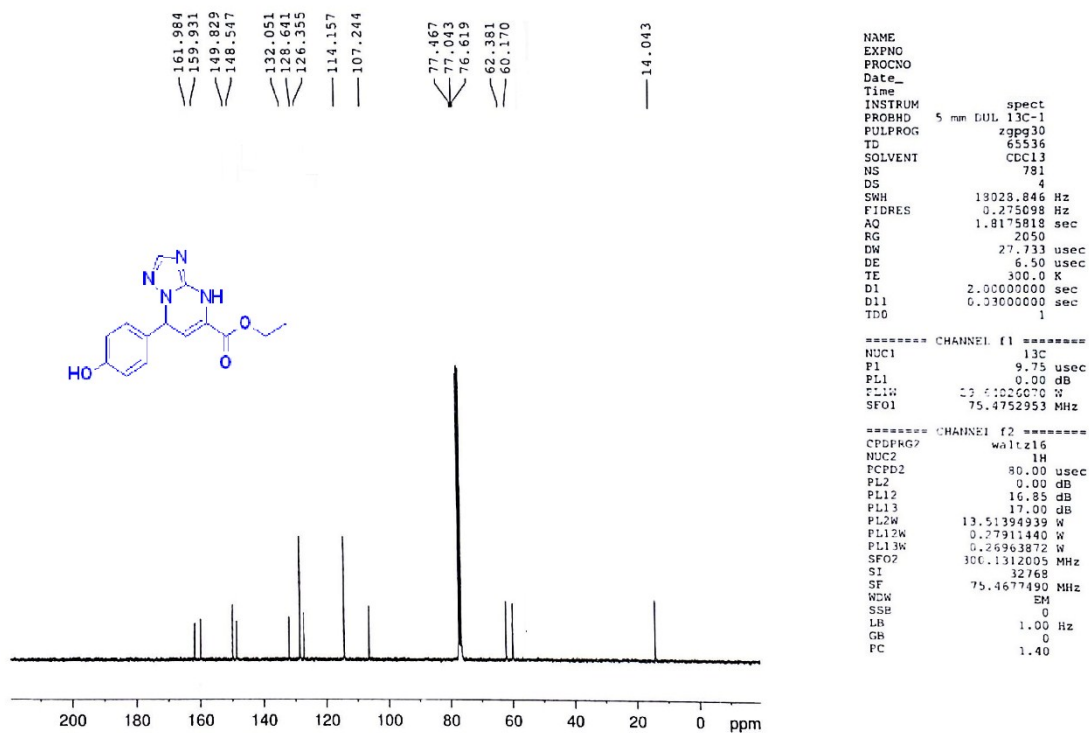

# <sup>1</sup>H NMR for compound 4g

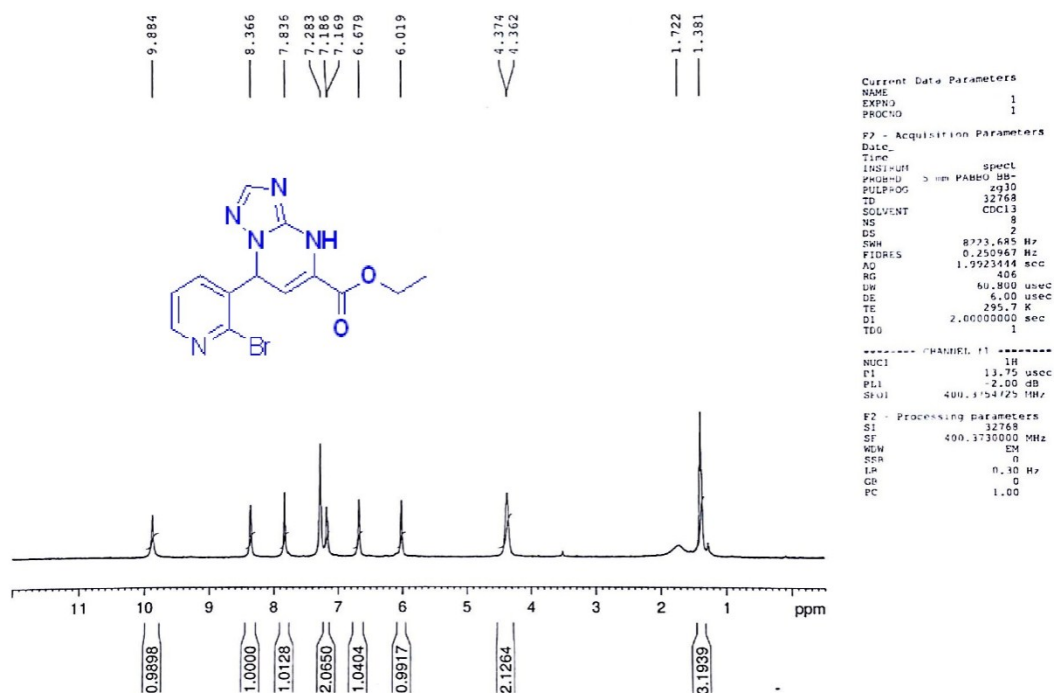

# <sup>13</sup>C NMR for compound 4g

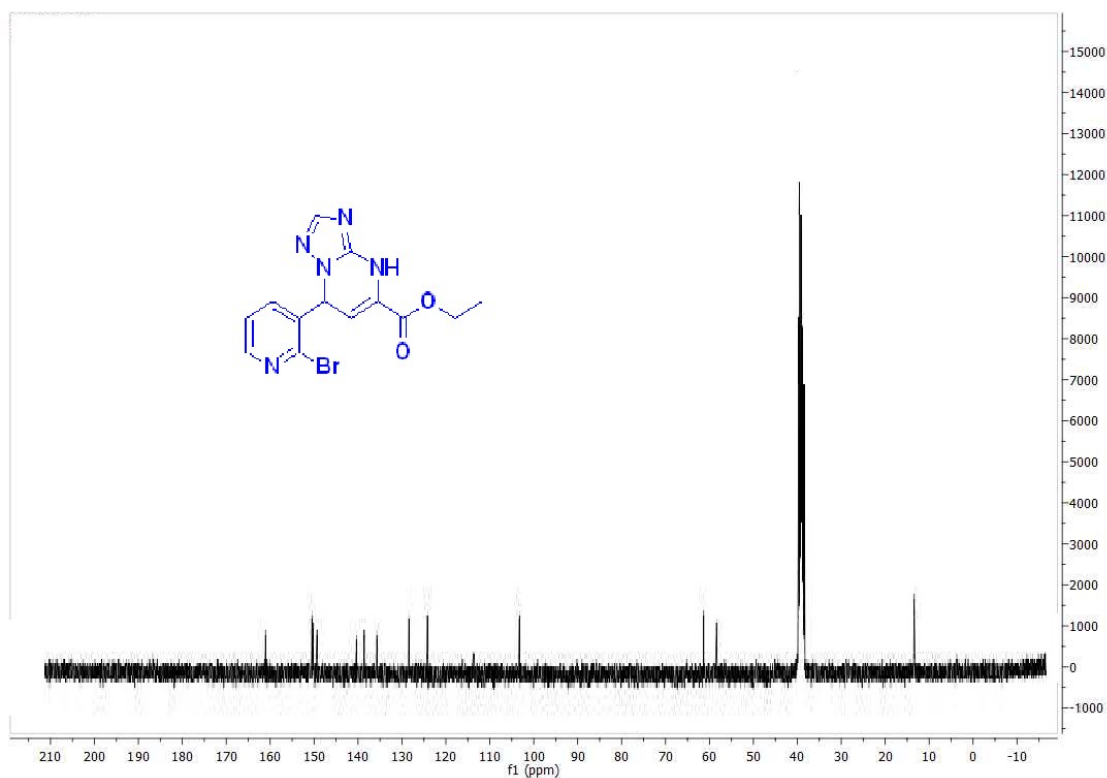

$^1\text{H}$  NMR for compound 4h

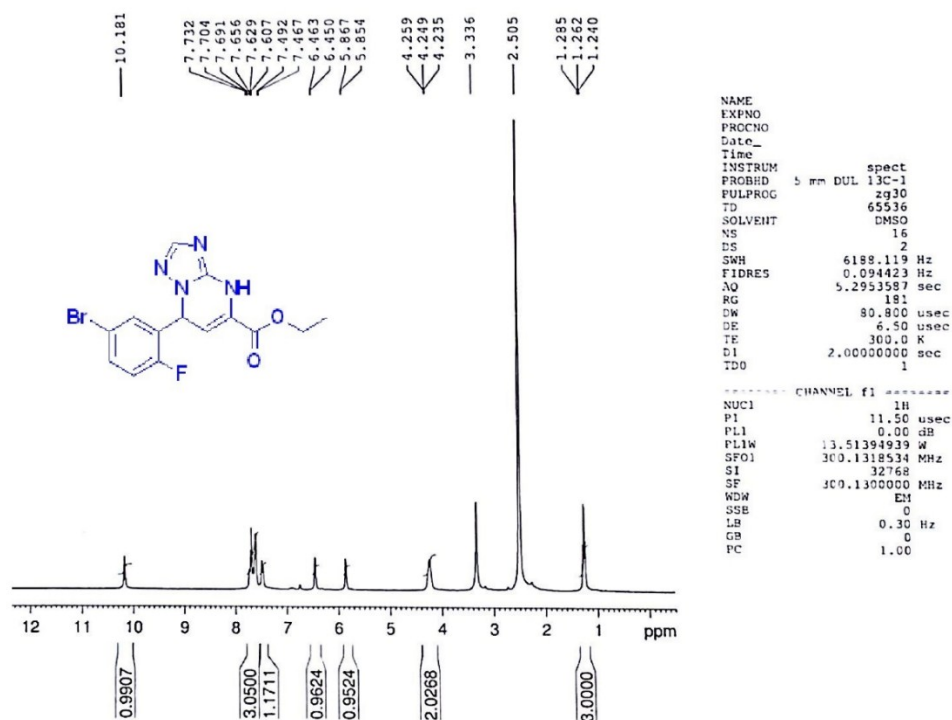

$^{13}\text{C}$  NMR for compound 4h (DMSO- $d_6$ )

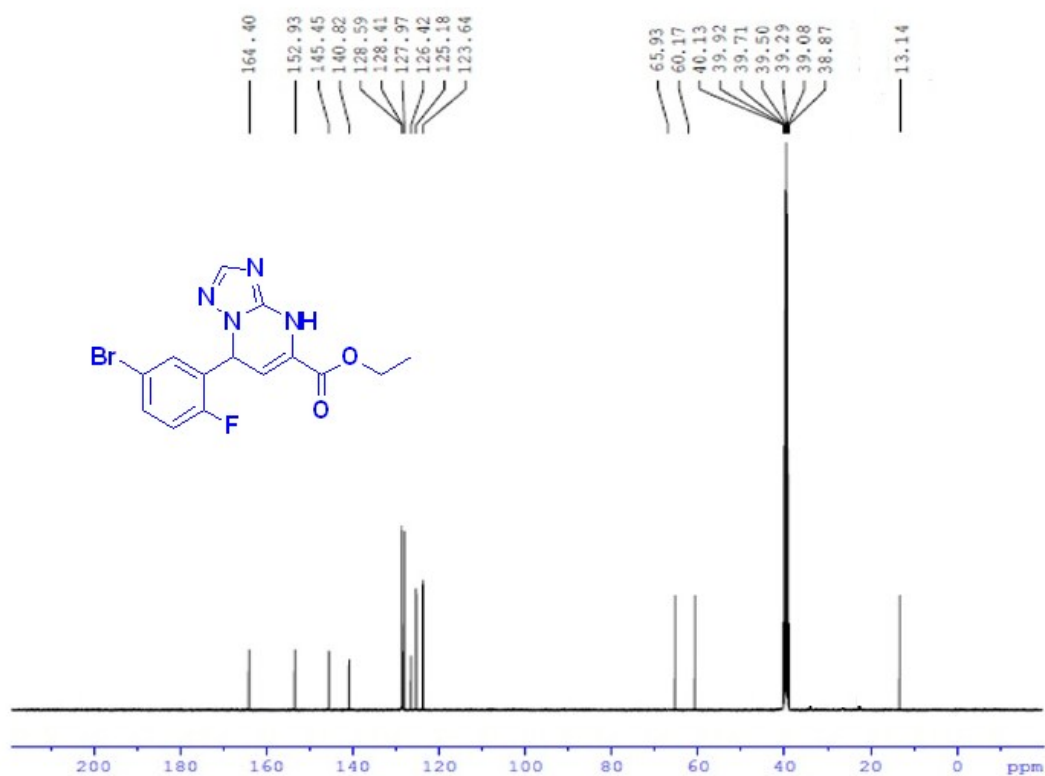

<sup>1</sup>H NMR for compound 5a

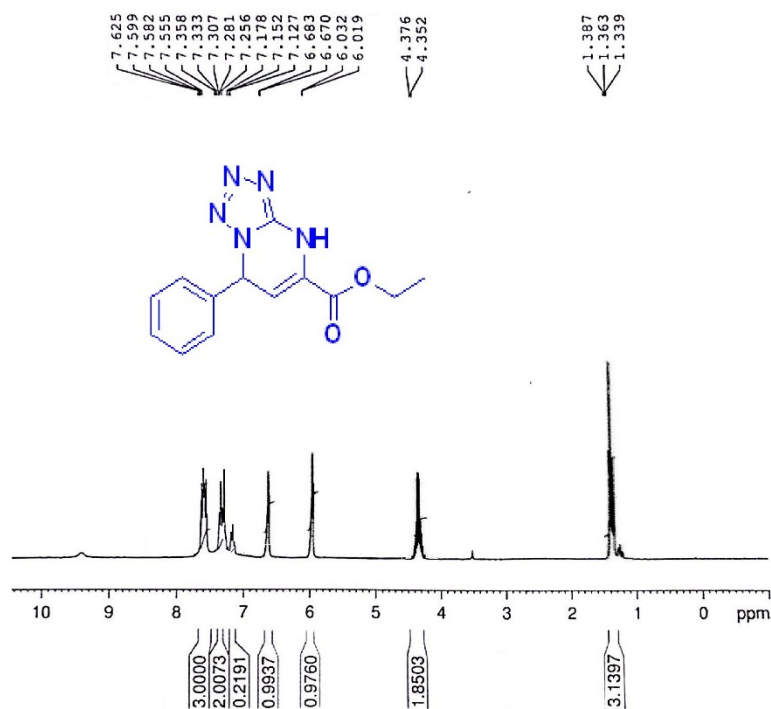

```

NAME
EXPNO
PROCNO
Date_
Time 12.42
INSTRUM spect
PROBHD 5 mm DUL 13C-1
PULPROG zg30
TD 65536
SOLVENT CDCl3
NS 8
DS 2
SWH 6188.119 Hz
FIDRES 0.094423 Hz
AQ 5.2953587 sec
RG 181
DE 80.800 usec
TE 300.0 K
D1 1.00000000 sec
TD0 1
  
```

```

----- CHANNEL f1 -----
NUC1 1H
P1 11.50 usec
PL1 0.00 dB
PL1W 13.51394939 W
SFO1 300.1318534 MHz
SI 32768
SF 300.1300000 MHz
WDW EM
SSB 0
LB 0.30 Hz
GB 0
PC 1.00
  
```

<sup>1</sup>H NMR for compound 5b

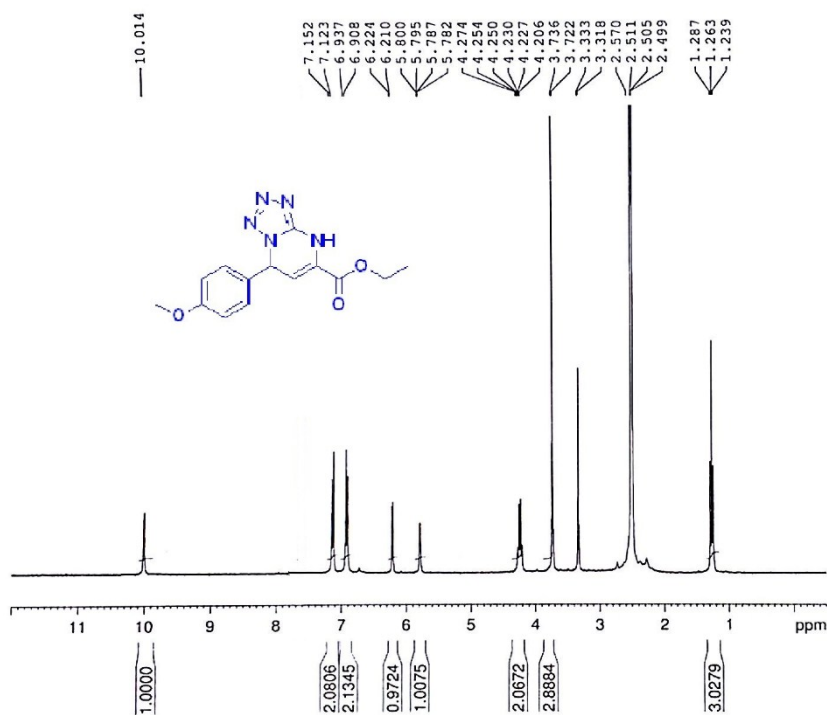

```

NAME
EXPNO
PROCNO
Date_
Time
INSTRUM spect
PROBHD 5 mm DUL 13C-1
PULPROG zg30
TD 65536
SOLVENT DMSO
NS 8
DS 2
SWH 6188.119 Hz
FIDRES 0.094423 Hz
AQ 5.2953587 sec
RG 181
DE 80.800 usec
TE 300.0 K
D1 2.00000000 sec
TD0 1
  
```

```

----- CHANNEL f1 -----
NUC1 1H
P1 11.50 usec
PL1 0.00 dB
PL1W 13.51394939 W
SFO1 300.1318534 MHz
SI 32768
SF 300.1300000 MHz
WDW EM
SSB 0
LB 0.30 Hz
GB 0
PC 1.00
  
```
